# Supplementary material
Source: publisher figshare collection journal article supplement (https://sage.figshare.com/ndownloader/files/16752302)
Supplement: Supplementary file 1 [file 16752302]

Fault1,rowitz and ewing (1996) Education Law Reporter,110, p. 517. ,59, 542; Davies, On this point, UK, s 12 2; (1999) ALD, p. 625. ,, C.J.,Scopus,,R,"Duplicate, incomplete, or retracted",Unclassified,,,,,,,N/A,,N/A,,,,,,
Fault2,azaki, M., Wire electro-chemical discharge machining of glasses and ceramics (1985) Bulletin of the Japan Society of Precision Engineering, Turning of titanium alloy with TiB2-coated carbides under cryogenic cooling (2003) Proceedings of the Institution of Mechanical Engineers Part B-Journal of Engineering Manufacture, 19 (1), Raleigh, USA; Venugopal, K.A., 217 (12),, W.,Scopus,,R,"Duplicate, incomplete, or retracted",Unclassified,,,,,,,N/A,,N/A,,,,,,
Fault3, On the Benefits of Concurrent Lending and Underwriting,, at 152In re Credit Suisse-AOL Sec. Litig., Investment Banker Directors and Affiliated Analysts' Forecasts, 3 J. INV. MOMT. 4, securities sales,, 465 F. Supp. 2d 34 (D. Mass. 2006)See Jacob et al, supra note 118,2003, 41 J. FIN. & QUANTITATIVE ANALYSIS 139,Scopus, 141 (2006)See Carl R. Chen et al.,R,"Duplicate, incomplete, or retracted",Unclassified,,,,,,,N/A,,N/A,,,,,,
Fault4,Annu. Rev. Med.,63, pp. 199-215; Koyanagi,66, K., H.J., D.S., Association of circulating tumor cells with serum tumor-related methylated DNA in peripheral blood of melanoma patients (2006) Cancer Res., pp. 6111-6117; Hoon,, Spugnardi,Scopus,,R,"Duplicate, incomplete, or retracted",Unclassified,,,,,,,N/A,,N/A,,,,,,
Fault5, M.T.,, Mesquita VP (2001) Effects of chlorine on cells of Vibrio cholerae Food Microbiology, R.S., Effects of temperature on ultraviolet light disinfection (1983) Environmental Science and Technology, T.R.,,18, pp. 355-359. , doi:10.1016/S0166-445X(97)00087-8; Stewart, W.,Scopus, Treatment of residual ballast water in the NOBOB ship using heat (2004) Second International Symposium On Ballast Water Treatment,R,"Duplicate, incomplete, or retracted",Unclassified,,,,,,,N/A,,N/A,,,,,,
Fault6, European Science Foundation Strasbourg,, S.C., J.J., Waxman,75,, (1992) The Evolution of Life Histories, ,87, B.O.,Scopus, Nielsen,R,"Duplicate, incomplete, or retracted",Unclassified,,,,,,,N/A,,N/A,,,,,,
Fault7, Holmström,, PRO1/P1030/05, Experimental Study and Analytical Methods for Particle Bed Dryout with Heterogeneous Particles and Pressure Variation, ICONE-22420 Proceedings of ICONE 10 10th International Conference on Nuclear Engineering, J.,, 28.2; (2003) ISP47-Phase-A-Mistra Experimental Results, p. 161. , p. 25. , France,Scopus, 14-16 November 2005,R,"Duplicate, incomplete, or retracted",Unclassified,,,,,,,N/A,,N/A,,,,,,
Fault9,mic abnormalities in traumatic brain injury (2010) J Neuropsychiatry Clin Neurosci,22, pp. 173-181; Wang, J., S., M.A., C., Spence, Assessing spatial relationships between axonal integrity regional brain volumes and neuropsychological outcomes after traumatic axonal injury (2010) J Neurotrauma,, pp. 2121-2130; Warner,Scopus,,R,"Duplicate, incomplete, or retracted",Unclassified,,,,,,,N/A,,N/A,,,,,,
2-s2.0-13844267646,"Beynnon B.D., Webb G., Huber B.M., Pappas C.N., Renström P., Haugh L.D.",Radiographic measurement of anterior talar translation in the ankle: Determination of the most reliable method,2005,"Background. Although most would agree that stress radiography is an important research tool to evaluate the integrity of the ankle ligaments in studies of chronic ankle instability, there is little agreement with regard to the best technique to make these measurements. The primary objective of this study was to establish the most reliable method for measuring anterior displacement of the talus relative to the tibia using stress radiographs of the ankle. This information is necessary to standardize radiographic evaluation of injured ankles and for biomechanical studies of the ankle joint, but has never been investigated. Methods. This study examined the reliability of four available methods by measuring the intra-observer repeatability and inter-observer reproducibility of three different investigators. Lateral radiographs were obtained while the ankle was supported in the Telos device with the joint unloaded, and then with a 150 N anterior directed load applied to the calcaneus. At two separate time intervals, the radiographs were read by three different observers using four measurement techniques. For each technique, the measurement of the unloaded ankle was subtracted from the loaded ankle to obtain anterior talar translation. Findings. The method that measured the shortest distance between the posterior lip of the distal tibia and the talar dome (designated Method I in the current series) was significantly more reproducible between readers and within readers across repeated measurements than the other methods tested. Interpretation. Based on the findings from this study, it can be concluded that measurement of the distance between the posterior lip of the distal tibia and the talar dome is the method of choice to characterize the position of the talus relative to the tibia in stress radiography. In order to standardize the radiographic evaluation of ankle injuries, this method should be the one employed to measure anterior talar translation. © 2004 Elsevier Ltd. All rights reserved.",Clinical Biomechanics,10.1016/j.clinbiomech.2004.11.011,"Dept. of Orthopaedics and Rehab., McClure Musculoskel. Research Center, University of Vermont, Burlington, Burlington, VT 05405, United States; Mansfield Orthopaedics, Stowe-Morrisville, VT, United States; Department of Radiology, Fletcher Allen Health Care, Burlington, VT, United States; Department of Orthopaedics, Sports Medicine and Arthroscopy, Karolinska Hospital, Stockholm, Sweden; Dept. of Mathematics and Statistics, University of Vermont, Burlington, VT, United States","Beynnon, B.D., Dept. of Orthopaedics and Rehab., McClure Musculoskel. Research Center, University of Vermont, Burlington, Burlington, VT 05405, United States; Webb, G., Dept. of Orthopaedics and Rehab., McClure Musculoskel. Research Center, University of Vermont, Burlington, Burlington, VT 05405, United States; Huber, B.M., Mansfield Orthopaedics, Stowe-Morrisville, VT, United States; Pappas, C.N., Department of Radiology, Fletcher Allen Health Care, Burlington, VT, United States; Renström, P., Department of Orthopaedics, Sports Medicine and Arthroscopy, Karolinska Hospital, Stockholm, Sweden; Haugh, L.D., Dept. of Mathematics and Statistics, University of Vermont, Burlington, VT, United States",Ankle; Anterior talar translation; Reliability,"Biomechanics; Bone; Ligaments; Radiography; Stress analysis; Ankle ligaments; Chronic ankle instability; Radiographs; Stress radiography; Joints (anatomy); ankle; article; calcaneus; controlled study; human; intermethod comparison; joint function; observer variation; priority journal; radiography; reliability; reproducibility; statistical significance; tibia; Ankle Injuries; Ankle Joint; Humans; Joint Instability; Observer Variation; Physical Examination; Physical Stimulation; Radiographic Image Enhancement; Radiographic Image Interpretation, Computer-Assisted; Reproducibility of Results; Sensitivity and Specificity; Sprains and Strains; Talus; Tibia",Article,Scopus,,R,Scope irrelevant,Unclassified,,,,,,,N/A,,N/A,,,,,,
2-s2.0-13844306537,"Field M.J., Behrman R.E.",Responsible research involving children,2005,[No abstract available],Ambulatory Pediatrics,10.1367/1539-4409(2005)5<47:RRIC>2.0.CO;2,"Institute of Medicine, National Academy of Sciences, 500 Fifth St. NW, Washington, DC 20001, United States; Education Steering Committee, Federation of Pediatric Organization, United States","Field, M.J., Institute of Medicine, National Academy of Sciences, 500 Fifth St. NW, Washington, DC 20001, United States; Behrman, R.E., Education Steering Committee, Federation of Pediatric Organization, United States",,"article; child; child health care; clinical research; decision making; government; health care policy; health care quality; human; informed consent; law; medical ethics; protection; quality of life; reimbursement; responsibility; risk assessment; Biomedical and Behavioral Research; economics; human experiment; legal aspect; pediatrics; professional standard; research ethics; social behavior; United States; Biomedical and Behavioral Research; Child; Ethics, Research; Humans; Informed Consent; Pediatrics; Professional Role; Social Responsibility; Therapeutic Human Experimentation; United States",Article,Scopus,,R,"Research ethics, bioethics, clinical ethics, or ethical role of universities in society",Unclassified,,,,,,,N/A,,N/A,,,,,,
2-s2.0-13844320609,"Etzel R.A., Szilagyi P.G., Cooper W., Dreyer B.P., Forrest C.B., McCormick D.P., Serwint J., Simpson L., Wood D., Darden P.M., Farrell M.H., McHenry C., Needleman H.L., Sharpe V.A.",Ambulatory Pediatric Association policy statement: Ensuring integrity for research with children,2005,"Conflicts of interest (both financial and nonfinancial) have eroded public trust in medical research. There is now overwhelming evidence for systematic bias due to conflicts of interest associated with financial links between researchers and their institutions to commercial entities. To help manage and eliminate conflicts of interest and to regain public trust, the Ambulatory Pediatric Association developed a code of ethics for research in general pediatrics. While researchers in general pediatrics encounter many of the same ethical challenges as other medical researchers, many issues apply uniquely to the study of children's health because children may not be able to protect their own interests. Copyright © 2005 by Ambulatory Pediatric Association.",Ambulatory Pediatrics,10.1367/1539-4409(2005)5<3:APAPSE>2.0.CO;2,"Dept. of Environmental/Occup. Health, George Washington Sch. Public Health, Washington, DC, United States; Ambulatory Pediatric Association, McLean, VA, United States; 4320 Diplomacy Dr., Anchorage, AK 99508, United States","Etzel, R.A., Dept. of Environmental/Occup. Health, George Washington Sch. Public Health, Washington, DC, United States, Ambulatory Pediatric Association, McLean, VA, United States, 4320 Diplomacy Dr., Anchorage, AK 99508, United States; Szilagyi, P.G.; Cooper, W.; Dreyer, B.P.; Forrest, C.B.; McCormick, D.P.; Serwint, J.; Simpson, L.; Wood, D.; Darden, P.M.; Farrell, M.H.; McHenry, C.; Needleman, H.L.; Sharpe, V.A.",,"article; child health care; confidentiality; financial management; health care organization; health care policy; justice; medical ethics; medical research; medical society; methodology; pediatrics; privacy; workshop; Biomedical and Behavioral Research; human; medical ethics; pediatrics; research ethics; standard; United States; Biomedical and Behavioral Research; Codes of Ethics; Ethics, Research; Humans; Pediatrics; Societies, Medical; United States",Article,Scopus,,R,"Research ethics, bioethics, clinical ethics, or ethical role of universities in society",Unclassified,,,,,,,N/A,,N/A,,,,,,
2-s2.0-14644436344,Ashing-Giwa K.T.,Can a culturally responsive model for research design bring us closer to addressing participation disparities? Lessons learned from cancer survivorship studies,2005,"Introduction: Health disparities research demands the inclusion of traditionally excluded peoples. Additional complex issues weigh into health disparities or multicultural research including sociopolitical context, cultural context, network or community context, and micro-level or personal dimensions. Conceptual Framework: This paper will present a work in progress based on psycho-oncology research: A Culturally Responsive Model for Research Design. The manuscript will describe the model's governing principles and practices employed to address these study components: 1) purpose of the research; 2) utilization of modified or new conceptual framework and operationalization; 3) methods and procedures; 4) participant and data safety and monitoring; 5) reliable and valid instrumentation; 6) drawing valid conclusions; 7) dissemination of findings; and 8) staff training. This paper will define these issues and present the guiding principles modeled to conduct culturally responsive research and increase research integrity. Discussion: Cancer control research is an important part of the stated commitment to reduce cancer incidence, morbidity, and mortality and to increase health-related quality of life. Ethnic minorities are overrepresented in cancer burden, yet underrepresented in research. This paper is part of a movement to articulate practical models for designing culturally responsive, multicultural research. The model may have implications for increasing ethnic minority participation in research.",Ethnicity and Disease,,"UCLA Dept. Psychiat./Biobehav. Sci., California Sch. of Prof. Psychology, Alliant International University, 760 Westwood Plaza, Los Angeles, CA 90095, United States","Ashing-Giwa, K.T., UCLA Dept. Psychiat./Biobehav. Sci., California Sch. of Prof. Psychology, Alliant International University, 760 Westwood Plaza, Los Angeles, CA 90095, United States",Cancer; Culture; Ethnic minority; Health disparities; Multicultural research; Recruitment; Research design,"article; cancer control; cancer incidence; cancer mortality; cancer research; cancer survival; cultural factor; demography; ethnic group; health behavior; health care system; human; information dissemination; information processing; methodology; minority group; morbidity; patient information; patient selection; process model; psychological aspect; quality of life; reliability; research ethics; research subject; safety; sampling; social aspect; staff training; United States; Cultural Diversity; Ethnic Groups; Humans; Models, Theoretical; Neoplasms; Research Design",Article,Scopus,,R,"Research ethics, bioethics, clinical ethics, or ethical role of universities in society",Unclassified,,,,,,,N/A,,N/A,,,,,,
2-s2.0-14944350336,Sontag D.,Abuses endangered veterans in cancer drug experiments.,2005,[No abstract available],The New York times,,,"Sontag, D.",,"administrative personnel; article; Biomedical and Behavioral Research; financial management; forgery; government; human; human experiment; industry; legal aspect; medical record; neoplasm; patient selection; personnel; Popular Approach/Source; practice guideline; public hospital; research subject; scientific misconduct; United States; Biomedical and Behavioral Research; Popular Approach/Source; Administrative Personnel; Fraud; Guideline Adherence; Hospitals, Veterans; Human Experimentation; Humans; Industry; Medical Records; Neoplasms; New York; Patient Selection; Research Personnel; Research Subjects; Research Support; Scientific Misconduct; United States; United States Department of Veterans Affairs",Article,Scopus,English,R,"Research ethics, bioethics, clinical ethics, or ethical role of universities in society",Unclassified,,,,,,,N/A,,N/A,,,,,,
2-s2.0-14944357730,Weiss R.,"U.S., researchers reach deal in '99 gene therapy case.",2005,[No abstract available],"Washington post (Washington, D.C. : 1974)",,,"Weiss, R.",,"article; Biomedical and Behavioral Research; Children's National Medical Center (Washington, DC); clinical trial; conflict of interest; economics; gene therapy; Genetics and Reproduction; hospital; human; industry; Legal Approach; legal aspect; legal liability; personnel; Popular Approach/Source; research subject; scientific misconduct; university; University of Pennsylvania; Biomedical and Behavioral Research; Children's National Medical Center (Washington, DC); Genetics and Reproduction; Legal Approach; Popular Approach/Source; University of Pennsylvania; Clinical Trials; Conflict of Interest; Gene Therapy; Hospitals; Humans; Industry; Liability, Legal; Research Personnel; Research Subjects; Scientific Misconduct; Universities",Article,Scopus,English,R,"Research ethics, bioethics, clinical ethics, or ethical role of universities in society",Unclassified,,,,,,,N/A,,N/A,,,,,,
2-s2.0-15044356902,White C.,UK agency to combat research misconduct.,2005,[No abstract available],BMJ (Clinical research ed.),,,"White, C.",,article; Biomedical and Behavioral Research; government; human; scientific misconduct; United Kingdom; Biomedical and Behavioral Research; Government Agencies; Great Britain; Humans; Scientific Misconduct,Article,Scopus,,R,Article format or year,Unclassified,,,,,,,N/A,,N/A,,,,,,
2-s2.0-17144415226,"Whitmer K., Sweeney C., Slivjak A., Sumner C., Barsevick A.",Strategies for maintaining integrity of a behavioral intervention,2005,"The purpose of this article is to address issues in maintaining the integrity of a behavioral intervention. Examples are provided from a recently completed study on how to train research staff and monitor the integrity of the intervention. In this exemplar, the integrity of the behavioral intervention was addressed by the design of the study and research staff training. Throughout the study, the integrity of the behavioral intervention was monitored by delineating a checklist of topics that must be addressed, critiquing audiotapes of the intervention, and discussing incomplete or missing elements with the research staff. © 2005 Sage Publications.",Western Journal of Nursing Research,10.1177/0193945904270087,"Institute for Nursing Research, University of Cincinnati, United States; Radiation Oncology, Fox Chase Cancer Center, United States; Department of Nursing, Fox Chase Cancer Center, United States; Fox Chase Cancer Center, United States","Whitmer, K., Institute for Nursing Research, University of Cincinnati, United States; Sweeney, C., Radiation Oncology, Fox Chase Cancer Center, United States; Slivjak, A., Department of Nursing, Fox Chase Cancer Center, United States; Sumner, C., Fox Chase Cancer Center, United States; Barsevick, A., Fox Chase Cancer Center, United States",Behavioral intervention; Intervention integrity; Research training,article; behavior; medical research; methodology; monitoring; training; validation process; Clinical Nursing Research; Fatigue; Humans; Intervention Studies; Neoplasms; Nursing Staff; Quality Control; Reproducibility of Results,Article,Scopus,,R,Scope irrelevant,Unclassified,,,,,,,N/A,,N/A,,,,,,
2-s2.0-17444376840,Kong W.M.,Legitimate requests and indecent proposals: Matters of justice in the ethical assessment of phase I trials involving competent patients,2005,"The death of Jesse Gelsinger in 1999 during a gene therapy trial raised many questions about the ethical review of medical research. Here, the author argues that the principle of justice is interpreted too narrowly and receives insufficient emphasis and that what we permit in terms of bodily invasion affects the value we place on individuals. Medical research is a societally supported activity. As such, the author contends that justice requires that invasive medical research demonstrates sufficiently compelling societal benefit. Many consider this societal benefit to be self evident. However, medical research is a complex activity; it yields new treatments but also creates financial rewards and affects health resource allocation. As research evolves into a multibillion pound, multinational enterprise, justice requires a much broader analysis of societal benefit. Without such evaluation we risk undermining the value of bodily integrity and of research participants.",Journal of Medical Ethics,10.1136/jme.2003.006684,"Department of Endocrinology, Faculty of Medicine, Imperial College, Du Cane Road, London W12 0NN, United Kingdom","Kong, W.M., Department of Endocrinology, Faculty of Medicine, Imperial College, Du Cane Road, London W12 0NN, United Kingdom",,"article; beneficence; clinical trial; competence; financial management; human; justice; medical decision making; medical ethics; medical research; medicolegal aspect; patient care; patient right; resource allocation; responsibility; risk benefit analysis; social aspect; volunteer; Analytical Approach; Biomedical and Behavioral Research; Altruism; Clinical Trials, Phase I; Ethics, Clinical; Humans; Informed Consent; Personal Autonomy; Value of Life",Article,Scopus,,R,"Research ethics, bioethics, clinical ethics, or ethical role of universities in society",Unclassified,,,,,,,N/A,,N/A,,,,,,
2-s2.0-17444380082,"Thompson Jr. D.E., Strganac T.W.",Nonlinear analysis of store-induced limit cycle oscillations,2005,"Flight tests of modern high-performance fighter aircraft reveal the presence of limit cycle oscillation (LCO) responses for aircraft with certain external store configurations. Conventional linear aeroelastic analysis predicts flutter for conditions well beyond the operational envelope, yet these store-induced LCO responses occur at flight conditions within the flight envelope. Several nonlinear sources may be present, including aerodynamic effects such as flow separation and shock-boundary layer interaction and structural effects such as stiffening, damping, and system kinematics. No complete theory has been forwarded to accurately explain the mechanisms responsible. This research examines a two degree-of-freedom aeroelastic system which possesses kinematic nonlinearities and a strong nonlinearity in pitch stiffness. Nonlinear analysis techniques are used to gain insight into the characteristics of the behavior of the system. Numerical simulation is used to verify and validate the analysis. It is found that when system damping is low, the system clearly exhibits nonlinear interaction between aeroelastic modes. It is also shown that although certain applied forcing conditions may appear negligible, these same forces produce large amplitude LCOs under specific realizable circumstances. © Springer 2005.",Nonlinear Dynamics,10.1007/s11071-005-1924-y,"Department of Aerospace Engineering, Texas AandM University, College Station, TX 77843-3141, United States; Lockheed Martin Missiles Fire Contr., MP-915, Orlando, FL 32819-8907, United States","Thompson Jr., D.E., Department of Aerospace Engineering, Texas AandM University, College Station, TX 77843-3141, United States, Lockheed Martin Missiles Fire Contr., MP-915, Orlando, FL 32819-8907, United States; Strganac, T.W., Department of Aerospace Engineering, Texas AandM University, College Station, TX 77843-3141, United States",Aeroelasticity; Autoparametric resonance; Forced aeroelastic response; Internal resonance,Aerodynamics; Boundary value problems; Computer simulation; Degrees of freedom (mechanics); Kinematics; Oscillators (mechanical); Resonance; Autoparametric resonance; Forced aeroelastic response; Freestream velocity; Internal resonance; Nonlinear systems,Article,Scopus,,R,Scope irrelevant,Unclassified,,,,,,,N/A,,N/A,,,,,,
2-s2.0-17644376904,"Caruso J., Hamill J., Yamauchi M., Mercado D., Cook T., Higginson B., O'Meara S., Elias J., Siconolfi S.",Albuterol aids resistance exercise in reducing unloading-induced ankle extensor strength losses,2005,"While resistance exercise (REX) reduces ankle extensor (AE) mass and strength deficits during short-term unloading; additional treatments, concurrently administered with REX, are required to attenuate the greater losses seen with longer unloading periods. Subjects performed left leg REX, which otherwise refrained from ambulatory and weight-bearing activity for 40 days, while randomized to a capsule (placebo, albuterol) dosing regimen with no crossover to note whether albuterol helps REX mitigate unloading-induced AE losses. A third group of subjects served as unloaded controls. On days 0, 20, and 40, the following data were collected from the left leg: calf cross-sectional area and AE strength measures. Cross-sectional area was estimated using anthropometric methodology, whereas AE strength data were obtained from eight unilateral calf-press repetitions on an inertial-based REX device. Repeated-measures mixed-factorial 3 X 3 analyses of covariance, with day 0 values as a covariate, revealed group X time interactions for the strength variables eccentric total work (ETW) and average power (EAP). Tukey's honestly significant difference shows REX-placebo subjects incurred significant ETW and EAP losses by day 40, whereas the REX-albuterol treatment evoked strength gains to those same variables without concurrent muscle accretion. Corresponding concentric variables did not display similar changes. Day 40 control data significantly declined for many variables; relative to the REX-albuterol treatment, some losses were significant after 20 days. ETW and EAP gains to unloaded AE may be due to one or more mechanisms. Continued research identifying mechanisms responsible for such changes, as well as the safety of REX-albuterol administration in other models, is warranted. Copyright © 2005 the American Physiological Society.",Journal of Applied Physiology,10.1152/japplphysiol.01015.2004,"Exercise Physiology Laboratory, University of Nevada, Reno, NV, United States; Movement Science Laboratory, Montana State University, Bozeman, MT, United States; Healthcare Research Associates, Orlando, FL, United States; Sch. of Hlth. Serv. and Hum. Perf., Ithaca College, Ithaca, NY, United States; 312 CH, Univ. of Tulsa, 600 S. College Ave., Tulsa, OK 74104, United States","Caruso, J., Exercise Physiology Laboratory, University of Nevada, Reno, NV, United States, Movement Science Laboratory, Montana State University, Bozeman, MT, United States, Healthcare Research Associates, Orlando, FL, United States, 312 CH, Univ. of Tulsa, 600 S. College Ave., Tulsa, OK 74104, United States; Hamill, J., Exercise Physiology Laboratory, University of Nevada, Reno, NV, United States; Yamauchi, M., Exercise Physiology Laboratory, University of Nevada, Reno, NV, United States; Mercado, D., Movement Science Laboratory, Montana State University, Bozeman, MT, United States; Cook, T., Movement Science Laboratory, Montana State University, Bozeman, MT, United States; Higginson, B., Movement Science Laboratory, Montana State University, Bozeman, MT, United States; O'Meara, S., Movement Science Laboratory, Montana State University, Bozeman, MT, United States; Elias, J., Exercise Physiology Laboratory, University of Nevada, Reno, NV, United States; Siconolfi, S., Sch. of Hlth. Serv. and Hum. Perf., Ithaca College, Ithaca, NY, United States",Salbutamol; Simulated space-flight; Triceps surae; Unilateral limb suspension,"placebo; salbutamol; analysis of variance; ankle; anthropometry; article; blood pressure; controlled study; crossover procedure; drug dose regimen; exercise; extensor muscle; female; gastrocnemius muscle; heart rate; human; leg exercise; male; mobilization; muscle mass; muscle strength; muscle weakness; normal human; priority journal; weight bearing; Albuterol; Ankle; Double-Blind Method; Exertion; Muscle Contraction; Muscle, Skeletal; Weight Lifting; Weight-Bearing",Article,Scopus,,R,Scope irrelevant,Unclassified,,,,,,,N/A,,N/A,,,,,,
2-s2.0-17844403785,"Polaha J., Cooper S.L., Meadows T., Kratochvil C.J.","The assessment of attention-deficit/hyperactivity disorder in rural primary care: The portability of the American Academy of Pediatrics guidelines to the ""real world""",2005,"Objective. To examine the implementation of a protocol for the assessment of attention-deficit/hyperactivity disorder (ADHD) in rural pediatric practices. The protocol was designed to provide an efficient means for pediatricians to learn and use the ADHD guidelines put forth by the American Academy of Pediatrics (AAP). Methods. Primary care staff (physicians, nurses, etc) from 2 rural pediatric practices were trained to use the ADHD-assessment protocol. Medical records for 101 patients were reviewed from 1 to 2 years before the introduction of the protocol and for 86 patients during the subsequent 2 to 3 years to assess compliance with the AAP guidelines. In addition, 34% of the scales scored by the staff were rescored to check for scoring accuracy. Results. Before the availability of the AAP guidelines and the implementation of the assessment protocol, neither primary care site was consistently collecting the comprehensive information that is now recommended for an ADHD assessment. Parent and/or teacher rating scales were collected for only 0% to 21% of assessments across sites. When provided with brief training and supporting materials, medical records reflected significant improvement in the ascertainment of clinically necessary ADHD information, with parent and teacher rating scales present 88% to 100% of the time. Staff demonstrated an ability to score rating scales with a high degree of accuracy. The integrity of protocol collection and management was maintained 2 to 3 years after training. Conclusions. An efficient system for conducting ADHD assessments according to AAP guidelines in rural pediatrics clinics can be initiated and maintained with integrity. Additional research is needed to determine if this system improves diagnostic decision-making and patient outcomes. Copyright © 2005 by the American Academy of Pediatrics.",Pediatrics,10.1542/peds.2004-1521,"Department of Psychology, Munroe-Meyer Institute, United States; Department of Psychiatry, University of Nebraska Medical Center, Omaha, NE, United States; Department of Psychology, University of Nebraska, 985450 Nebraska Medical Center, Omaha, NE 68105, United States","Polaha, J., Department of Psychology, Munroe-Meyer Institute, United States, Department of Psychology, University of Nebraska, 985450 Nebraska Medical Center, Omaha, NE 68105, United States; Cooper, S.L., Department of Psychology, Munroe-Meyer Institute, United States; Meadows, T., Department of Psychology, Munroe-Meyer Institute, United States; Kratochvil, C.J., Department of Psychiatry, University of Nebraska Medical Center, Omaha, NE, United States",Assessment; Attention-deficit/hyperactivity disorder; Guidelines; Pediatric,"article; attention deficit disorder; child; controlled study; diagnostic accuracy; female; human; major clinical study; male; medical record; nurse; parent; patient assessment; physician; practice guideline; primary medical care; priority journal; rating scale; rural area; teacher; education; evaluation; manpower; medical education; medical society; pediatrics; personnel management; primary health care; rural health care; United States; Attention Deficit Disorder with Hyperactivity; Child; Education, Medical, Continuing; Guideline Adherence; Humans; Nebraska; Pediatrics; Practice Guidelines; Primary Health Care; Rural Health Services; Societies, Medical; Staff Development; United States",Article,Scopus,,R,Scope irrelevant,Unclassified,,,,,,,N/A,,N/A,,,,,,
2-s2.0-19644368505,[No author name available],Special report: taking on the cheats.,2005,[No abstract available],Nature,,,,,"algorithm; article; Biomedical and Behavioral Research; computer program; factual database; Internet; legal aspect; publication; publishing; scientific misconduct; standard; statistics; writing; Biomedical and Behavioral Research; Algorithms; Authorship; Databases, Factual; Duplicate Publication; Internet; Periodicals; Plagiarism; Publishing; Scientific Misconduct; Software",Article,Scopus,English,R,Article format or year,Unclassified,,,,,,,N/A,,N/A,,,,,,
2-s2.0-20444482507,"Breen L., Maassen M.",Reducing the incidence of plagiarism in an undergraduate course: The role of education,2005,"Plagiarism by students is an increasing problem at higher education institutions. However, the development of academic misconduct policies has done little to reduce the incidence of plagiarism as many incidents result from ignorance and poor skill development rather than intentional misconduct Our purpose in embarking on this research project was twofold: first, to investigate student perceptions of plagiarism and its avoidance, and second, to develop learning materials that would educate students to be better able to avoid plagiarism in their work. The study consisted of two phases. Phase one consisted of four focus groups with undergraduate psychology students in order to determine their understanding of plagiarism, difficulties with avoiding plagiarism, and the process of learning to write without plagiarising. Phase two concerned the development and evaluation of learning materials, which consisted of three tutorials and a 'tip sheet'. The learning materials are flexible to different disciplines and learning modes, require minimal changes to units and assessment and need little ongoing staff commitment Thus, the proposed learning materials have a number of advantages over alternate methods of plagiarism reduction.",Issues in Educational Research,,"Edith Cowan University, Australia","Breen, L., Edith Cowan University, Australia; Maassen, M., Edith Cowan University, Australia",,,Article,Scopus,,R,Cheating (exclusively),Unclassified,,,,,,,N/A,,N/A,,,,,,
2-s2.0-20644449671,Maloney D.M.,"University uses ""implied informed consent"".",2005,[No abstract available],Human research report,,"The Deem Corporation, P.O. Box 44069, Omaha, NE 68144, USA.","Maloney, D.M., The Deem Corporation, P.O. Box 44069, Omaha, NE 68144, USA.",,"article; Biomedical and Behavioral Research; family; human; human experiment; informed consent; Legal Approach; legal aspect; Office for Protection from Research Risks; practice guideline; privacy; professional standard; public health service; questionnaire; research subject; twins; United States; university; Biomedical and Behavioral Research; Legal Approach; Office for Protection from Research Risks; Consent Forms; Ethics Committees, Research; Family; Guideline Adherence; Human Experimentation; Humans; Informed Consent; Privacy; Questionnaires; Research Subjects; Twins; United States; United States Office of Research Integrity; Universities",Article,Scopus,,R,Accessibility and language,Unclassified,,,,,,,N/A,,N/A,,,,,,
2-s2.0-20644450584,Gibson L.,Adverse reaction reports may be vulnerable to manipulation.,2005,[No abstract available],BMJ (Clinical research ed.),,,"Gibson, L.",,"generic drug; article; Biomedical and Behavioral Research; drug industry; drug surveillance program; Health Care and Public Health; postmarketing surveillance; scientific misconduct; statistical analysis; Biomedical and Behavioral Research; Health Care and Public Health; Adverse Drug Reaction Reporting Systems; Data Interpretation, Statistical; Drug Industry; Drugs, Generic; Product Surveillance, Postmarketing; Scientific Misconduct",Article,Scopus,English,R,Article format or year,Unclassified,,,,,,,N/A,,N/A,,,,,,
2-s2.0-20644459458,Maloney D.M.,"IRB opts for ""user friendly"" letter rather than an informed consent form.",2005,[No abstract available],Human research report,,"The Deem Corporation, P.O. Box 44069, Omaha, NE 68144, USA.","Maloney, D.M., The Deem Corporation, P.O. Box 44069, Omaha, NE 68144, USA.",,"article; Biomedical and Behavioral Research; ethics; family; human; human experiment; informed consent; legal aspect; Office for Protection from Research Risks; professional standard; public health service; questionnaire; research subject; twins; United States; Biomedical and Behavioral Research; Office for Protection from Research Risks; Consent Forms; Ethics Committees, Research; Family; Human Experimentation; Humans; Informed Consent; Questionnaires; Research Subjects; Twins; United States; United States Office of Research Integrity",Article,Scopus,,R,Accessibility and language,Unclassified,,,,,,,N/A,,N/A,,,,,,
2-s2.0-21744433713,Maloney D.M.,Protection of human subjects and coded private information.,2005,[No abstract available],Human research report,,"The Deem Corporation, P.O. Box 44069, Omaha, NE 68144, USA.","Maloney, D.M., The Deem Corporation, P.O. Box 44069, Omaha, NE 68144, USA.",,"article; Biomedical and Behavioral Research; financial management; health care organization; human; human experiment; laboratory diagnosis; Legal Approach; legal aspect; medical research; Office for Human Research Protection; organization and management; privacy; public health service; United States; Biomedical and Behavioral Research; Legal Approach; Office for Human Research Protection; Biomedical Research; Financing, Government; Human Experimentation; Humans; National Institutes of Health (U.S.); Privacy; Research Support; Specimen Handling; United States; United States Office of Research Integrity",Article,Scopus,,R,Accessibility and language,Unclassified,,,,,,,N/A,,N/A,,,,,,
2-s2.0-21744436128,Check E.,Retracted papers damage work on DNA repair.,2005,[No abstract available],Nature,,,"Check, E.",,BRCA1 protein; article; Cockayne syndrome; DNA repair; genetics; human; interpersonal communication; legal aspect; metabolism; oxidative stress; publishing; research; scientific misconduct; standard; United States; university; BRCA1 Protein; Cockayne Syndrome; DNA Repair; Humans; North Carolina; Oxidative Stress; Research; Retraction of Publication; Scientific Misconduct; Truth Disclosure; Universities,Article,Scopus,English,R,Article format or year,Unclassified,,,,,,,N/A,,N/A,,,,,,
2-s2.0-22844448585,Weiss R.,Many scientists admit to misconduct: degrees of deception vary in poll; researchers say findings could hurt the field.,2005,[No abstract available],"Washington post (Washington, D.C. : 1974)",,,"Weiss, R.",,article; Biomedical and Behavioral Research; Empirical Approach; ethics; human; medical research; personnel; Popular Approach/Source; questionnaire; scientific misconduct; statistics; United States; Biomedical and Behavioral Research; Empirical Approach; Popular Approach/Source; Biomedical Research; Humans; Questionnaires; Research Personnel; Scientific Misconduct; United States,Article,Scopus,English,R,Article format or year,Unclassified,,,,,,,N/A,,N/A,,,,,,
2-s2.0-23244445505,Dean C.,"Mundane misdeeds skew findings, researchers say.",2005,[No abstract available],The New York times,,,"Dean, C.",,article; Biomedical and Behavioral Research; classification; Empirical Approach; ethics; human; medical research; methodology; personnel; Popular Approach/Source; questionnaire; scientific misconduct; statistics; United States; writing; Biomedical and Behavioral Research; Empirical Approach; Popular Approach/Source; Authorship; Biomedical Research; Humans; Questionnaires; Research Design; Research Personnel; Scientific Misconduct; United States,Article,Scopus,English,R,Article format or year,Unclassified,,,,,,,N/A,,N/A,,,,,,
2-s2.0-23944516272,Bernasconi A.,"University entrepreneurship in a developing country: The case of the P. Universidad Católica de Chile, 1985-2000",2005,"Privatization in higher education is usually understood either as the surge of private institutions or as universities' growing reliance on private sources of funding or otherwise operating more like firms. Joining the growing literature on university entrepreneurship, this is a case study on the less examined problem of entrepreneurial universities in developing countries. In a period of roughly 15∈years, the Pontificia Universidad Católica of Chile, founded in 1888, turned itself from a mostly teaching institution to a research-oriented university, responsible for one-fourth of the Chile's mainstream scientific output and 40% of all Ph.D.s awarded nationally. Yet, public funding represents today only 17% of its revenues, down from almost 90% in 1972. How such academic development could have occurred as the State withdrew and the market took hold of Chilean higher education after the reforms introduced by the military rule of Augusto Pinochet (1973-1990) is the theme of this work. Universidad Católica's policies and strategies are described, and the factors contributing to its success, together with their limitations, identified. The case suggests that orientation to the market can be more a means for survival and growth under the pressure of privatization, than a result of a 'Triple Helix' strategy of universities, government and industry to generate innovation out of academic knowledge. Secondly, while in the industrialized world, higher education entrepreneurship is associated with knowledge production for economic development ('Mode 2'), entrepreneurial universities in the context of developing countries may just be finding their way to the academic, disciplinary mode of research. © Springer 2005.",Higher Education,10.1007/s10734-004-6353-1,"School of Law, Universidad de Talca, P.O. Box 747, Talca, Chile","Bernasconi, A., School of Law, Universidad de Talca, P.O. Box 747, Talca, Chile",Entrepreneurial University; Higher education Chile; Higher education Latin America; Mode 2 knowledge production; Organizational change; Private higher education; Privatization of higher education; Second academic revolution; Triple Helix,,Article,Scopus,,R,"Research ethics, bioethics, clinical ethics, or ethical role of universities in society",Unclassified,,,,,,,N/A,,N/A,,,,,,
2-s2.0-24144446392,"Suárez H., González D., Royero G., Hoyer M., Wildermann E.",Analyses and evaluation of the georectification process of IKONOS images of petroleum exploration and production areas [Análisis y evaluación del proceso de georrectificación de imágenes IKONOS de áreas de exploración y producción petrolera],2005,"A digital image's raw format contains geometric distortions originated at their acquisition. They can not be used directly as a map, but require of a process known as georectification, which needs ground control points (GCP) recognized both in the image and in the corresponding terrain position. This allows to obtain an image with the geometric integrity of a map. The research considered analysis and evaluation of several mathematical models for the georectification process. Three panchromatic digital images of the IKONOS platform, property of Petróleos de Venezuela S.A. (PDVSA) were used. The images cover a surface of 330km2 of the operative area of OleoLUZ (a subsidiary of PDVSA), located at the north of Maracaibo city. GCPs used for georectification were obtained by GPS measurement. The georectification of images were done with PCI Geomatics V.8.2.1 software. Tests performed showed that 3rd order polynomials were the most adequate mathematical models, obtaining georectificated images with residuals of less than ± 1 m.",Interciencia,,"Escuela de Ingeniería Geodésica, LUZ, Apartado Postal 4011, Maracaibo, Venezuela; LGFS, LUZ, Venezuela; Jefe del Laboratorio de Fotogrametría y Sensores Remotos, LUZ, Venezuela; Jefe del LGFS, LUZ, Venezuela; Jefe del Deparatamento de Geodesia Superior, LUZ, Venezuela","Suárez, H., Escuela de Ingeniería Geodésica, LUZ, Apartado Postal 4011, Maracaibo, Venezuela; González, D., LGFS, LUZ, Venezuela; Royero, G., Jefe del Laboratorio de Fotogrametría y Sensores Remotos, LUZ, Venezuela; Hoyer, M., Jefe del LGFS, LUZ, Venezuela; Wildermann, E., Jefe del Deparatamento de Geodesia Superior, LUZ, Venezuela",,,Article,Scopus,,R,Scope irrelevant,Unclassified,,,,,,,N/A,,N/A,,,,,,
2-s2.0-24144473054,Swazo N.K.,Research integrity and rights of indigenous peoples: Appropriating Foucault's critique of knowledge/power,2005,"In this paper I appropriate the philosophical critique of Michel Foucault as it applies to the engagement of Western science and indigenous peoples in the context of biomedical research. The science of population genetics, specifically as pursued in the Human Genome Diversity Project, is the obvious example to illustrate (a) the contraposition of modern science and 'indigenous science', (b) the tendency to depreciate and marginalize indigenous knowledge systems, and (c) the subsumption of indigenous moral preferences in the juridical armature of international human rights law. I suggest that international bioethicists may learn from Foucault's critique, specifically of the need for vigilance about the knowledge/power relation expressed by the contraposition of modern science and 'indigeneity'. © 2005 Elsevier Ltd. All rights reserved.",Studies in History and Philosophy of Science Part C :Studies in History and Philosophy of Biological and Biomedical Sciences,10.1016/j.shpsc.2005.07.006,"Department of Philosophy and Humanities, University of Alaska, Fairbanks, Fairbanks, AK 99775-5740, United States","Swazo, N.K., Department of Philosophy and Humanities, University of Alaska, Fairbanks, Fairbanks, AK 99775-5740, United States",Bioethics; Human rights; Indigenous aboriginal peoples; Michel Foucault,"article; behavior; cultural anthropology; ethics; ethnic and racial groups; history; human; human rights; knowledge; medical research; philosophy; population genetics; research ethics; standard; Biomedical Research; Ethics, Research; Genetics, Population; History, 20th Century; History, 21st Century; Human Rights; Humans; Knowledge; Philosophy; Population Groups; Power (Psychology); Western World",Article,Scopus,,R,"Research ethics, bioethics, clinical ethics, or ethical role of universities in society",Unclassified,,,,,,,N/A,,N/A,,,,,,
2-s2.0-24144487124,"Hudson R., Wehrell R.",Socially responsible investors and the microentrepreneur: A Canadian case,2005,"Socially responsible investors buy financial securities with two goals: to make a market-based return, and to make companies act in a more socially responsible way. Most research on socially responsible investment deals with investing in stocks traded on major exchanges. We add the case of loaning small amounts of funds to microentrepreneurs through a discussion of a particular case. The case is that of Calmeadow which, in conjunction with the Royal Bank of Canada, set up a microlending project in rural Nova Scotia (Canada). Using Hirschman's analysis of ""exit"" and ""voice"", we show that while socially responsible investors may make market-based returns for their investments in stocks traded on major exchanges, they have no effect on corporate behaviour because their action consists of exit, and they are easily replaced by other investors. They attain their first goal but not their second. On the other hand, in the Calmeadow/Royal Bank of Canada case, we see that those who lend money to microenterprises can more easily use voice. The relative power difference between the lender and the microentrepreneur enables the lender to make the microentrepreneur act in a more socially responsible way, although only marginally. But because of the market imperfections existing in this case (the very high transactions costs associated with administering small loans), the lender concluded it could not attain a market rate of return. In this case, then, the lender attained its second goal but not its first. © Springer 2005.",Journal of Business Ethics,10.1007/s10551-005-0135-2,"Department of Commerce, Mount Allison University, 144 Main Street, Sackville, NB E4L 1A7, Canada; Extension Programme, Saint Francis Xavier University, Antigonish, NS, Canada","Hudson, R., Department of Commerce, Mount Allison University, 144 Main Street, Sackville, NB E4L 1A7, Canada; Wehrell, R., Extension Programme, Saint Francis Xavier University, Antigonish, NS, Canada",,,Article,Scopus,,R,"Research ethics, bioethics, clinical ethics, or ethical role of universities in society",Unclassified,,,,,,,N/A,,N/A,,,,,,
2-s2.0-24644444221,"Angwin A.J., Chenery H.J., Copland D.A., Murdoch B.E., Silburn P.A.",Summation of semantic priming and complex sentence comprehension in Parkinson's disease,2005,"Research has suggested that the integrity of semantic processing may be compromised in Parkinson's disease (PD), which may account for difficulties in complex sentence comprehension. In order to investigate the time course and integrity of semantic activation in PD, 20 patients with PD and 23 healthy controls performed a lexical decision task based on the multi-priming paradigm. Semantic priming effects were measured across stimulus onset asynchronies of 250 ms, 600 ms, and 1200 ms. Further, PD participants performed an auditory comprehension task. The results revealed significantly different patterns of semantic priming for the PD group at the 250-ms and 1200-ms SOAs. In addition, a delayed time course of semantic activation was evident for PD patients with poor comprehension of complex sentences. These results provide further support to suggest that both automatic and controlled aspects of semantic activation may be compromised in PD. Furthermore, the results also suggest that some sentence comprehension deficits in PD may be related to a reduction in information processing speed. © 2005 Elsevier B.V. All rights reserved.",Cognitive Brain Research,10.1016/j.cogbrainres.2005.04.008,"Centre for Research in Language Processing and Linguistics, Division of Speech Pathology, University of Queensland, Brisbane, QLD 4072, Australia; Department of Neurosciences, Princess Alexandra Hospital, Brisbane, QLD, Australia","Angwin, A.J., Centre for Research in Language Processing and Linguistics, Division of Speech Pathology, University of Queensland, Brisbane, QLD 4072, Australia; Chenery, H.J., Centre for Research in Language Processing and Linguistics, Division of Speech Pathology, University of Queensland, Brisbane, QLD 4072, Australia; Copland, D.A., Centre for Research in Language Processing and Linguistics, Division of Speech Pathology, University of Queensland, Brisbane, QLD 4072, Australia; Murdoch, B.E., Centre for Research in Language Processing and Linguistics, Division of Speech Pathology, University of Queensland, Brisbane, QLD 4072, Australia; Silburn, P.A., Centre for Research in Language Processing and Linguistics, Division of Speech Pathology, University of Queensland, Brisbane, QLD 4072, Australia, Department of Neurosciences, Princess Alexandra Hospital, Brisbane, QLD, Australia",Levodopa; Parkinson's disease; Semantic priming; Sentence processing; Signal-to-noise ratio,adult; article; auditory discrimination; clinical article; comprehension; controlled study; decision making; discriminative stimulus; female; human; information processing; male; Parkinson disease; priority journal; semantics; task performance; word recognition; Acoustic Stimulation; Aged; Comprehension; Decision Making; Demography; Female; Humans; Male; Middle Aged; Neuropsychological Tests; Parkinson Disease; Photic Stimulation; Reaction Time; Semantics; Time Factors,Article,Scopus,,R,Scope irrelevant,Unclassified,,,,,,,N/A,,N/A,,,,,,
2-s2.0-25144439619,"Held J., Manser T.",A PDA-based system for online recording and analysis of concurrent events in complex behavioral processes,2005,"This article outlines how a Palm- or Newton-based PDA (personal digital assistant) system for online event recording was used to record and analyze concurrent events. We describe the features of this PDA-based system, called the FIT-System (flexible interface technique), and its application to the analysis of concurrent events in complex behavioral processes-in this case, anesthesia work processes. The patented FTT-System has a unique user interface design allowing the user to design an interface template with a pencil and paper or using a transparency film. The template usually consists of a drawing or sketch that includes icons or symbols that depict the observer's representation of the situation to be observed. In this study, the FTT-System allowed us to create a design for fast, intuitive online recording of concurrent events using a set of 41 observation codes. An analysis of concurrent events leads to a description of action density, and our results revealed a characteristic distribution of action density during the administration of anesthesia in the operating room. This distribution indicated the central role of the overlapping operations in the action sequences of medical professionals as they deal with the varying requirements of this complex task. We believe that the FTT-System for online recording of concurrent events in complex behavioral processes has the potential to be useful across a broad spectrum of research areas. Copyright 2005 Psychonomic Society, Inc.",Behavior Research Methods,,"Swiss Federal Institute of Technology (ETH), Zurich, Switzerland; Swiss Federal Institute of Technology, Clausiusstrasse 25, CH-8092 Zurich, Switzerland","Held, J., Swiss Federal Institute of Technology (ETH), Zurich, Switzerland, Swiss Federal Institute of Technology, Clausiusstrasse 25, CH-8092 Zurich, Switzerland; Manser, T., Swiss Federal Institute of Technology (ETH), Zurich, Switzerland",,"3,4 methylenedioxymethamphetamine; addiction; adult; article; behaviorism; female; human; information processing; instrumentation; Internet; male; mathematical computing; memory; microcomputer; psychometry; reproducibility; scientific misconduct; statistical analysis; statistics; Adult; Behaviorism; Computers, Handheld; Data Collection; Data Interpretation, Statistical; Female; Humans; Internet; Male; Mathematical Computing; Memory; N-Methyl-3,4-methylenedioxyamphetamine; Psychometrics; Reproducibility of Results; Scientific Misconduct; Substance-Related Disorders",Article,Scopus,English,R,Scope irrelevant,Unclassified,,,,,,,N/A,,N/A,,,,,,
2-s2.0-25444490101,Hamzaee R.G.,A survey and a theoretical model of distance education programs,2005,"In search of a distance education program's crucial success factors, this research was conducted through a designed survey and evaluation instrument, for a predominantly doctoral program at DE University (DEU, an adopted name). Also, the survey has identified some challenging factors along with students' most crucial reasons for adopting distance education programs. The author has presented a Testable theoretical model of distance education programs. The top four success factors were revealed to be program quality, general recognition and academic integrity, students' satisfaction, and students' progress toward the ultimate goal of graduation. Lack of time and worries about the degree recognition by prospective academic and nonacademic employers were the most crucial challenging factors. © International Atlantic Economic Society 2005.",International Advances in Economic Research,10.1007/s11294-005-3017-6,"Missouri Western State College, St. Louis, MO, United States; Walden University, Minneapolis, MN, United States","Hamzaee, R.G., Missouri Western State College, St. Louis, MO, United States, Walden University, Minneapolis, MN, United States",,,Article,Scopus,,R,Scope irrelevant,Unclassified,,,,,,,N/A,,N/A,,,,,,
2-s2.0-25444516853,"Hsieh S.-J., Crane R., Sathish S.","Understanding and predicting electronic vibration stress using ultrasound excitation, thermal profiling, and neural network modeling",2005,"Vibration stress is a major source for failure of electronics components. In this study, we used an ultrasonic/infrared system to generate vertical vibration of a microprocessor on a printed circuit board, in order to study the impact of short burst high load vibration stress on component integrity. The objectives of this research were to (1) understand the impact of vibration on electronic components under ultrasound excitation; (2) model the thermal profile presented under vibration stress; and (3) predict stress level given a thermal profile of an electronic component. Research tasks included: (1) retrofit of current ultrasonic/infrared nondestructive testing system with sensory devices for temperature readings; (2) design of software tool to process images acquired from the ultrasonic/infrared system; (3) developing hypotheses and conducting experiments; and (4) modeling and evaluation of electronic vibration stress levels using a neural network model. Results suggest that (1) an ultrasonic/infrared system can be used to mimic short burst high vibration loads for electronics components; (2) temperature readings for electronic components under vibration stress are consistent and repeatable; (3) as stress load and excitation time increase, temperature differences also increase; (4) components that are subjected to a relatively high prestress load, followed by a normal operating load, have a higher heating rate and lower cooling rate. These findings are based on grayscale changes in images captured during experimentation. Discriminating variables and a neural network model were designed to predict stress levels given temperature and/or grayscale readings. Results suggest a 15.3% error when using grayscale change rate and 12.8% error when using average heating rate within the neural network model. Data were obtained from a high stress point (the corner) of the chip. © 2005 Taylor & Francis.",Nondestructive Testing and Evaluation,10.1080/10589750500149149,"Texas AandM University, 3367 TAMU, College Station, TX 77843, United States; Air Force Research Laboratory, AFRL/MLLP, Wright-Patterson AFB, OH 45433, United States; University of Dayton Research Institute, 300 College Park, Dayton, OH 45469, United States","Hsieh, S.-J., Texas AandM University, 3367 TAMU, College Station, TX 77843, United States; Crane, R., Air Force Research Laboratory, AFRL/MLLP, Wright-Patterson AFB, OH 45433, United States; Sathish, S., University of Dayton Research Institute, 300 College Park, Dayton, OH 45469, United States",Electronics; Infrared; Neural networks; Thermal profiles; Ultrasonic; Vibration stress,Infrared devices; Mathematical models; Microprocessor chips; Neural networks; Nondestructive examination; Printed circuit boards; Temperature measurement; Ultrasonic devices; Electronic components; Excitation time; Thermal profiles; Vibration stress; Vibrations (mechanical),Article,Scopus,,R,Scope irrelevant,Unclassified,,,,,,,N/A,,N/A,,,,,,
2-s2.0-25844453461,"Bilderback T.E., Warren S.L., Owen Jr. J.S., Albano J.P.",Healthy substrates need physicals too!,2005,"Many research studies have evaluated potential organic and mineral container substrate components for use in commercial potting substrates. Most studies report results of plant growth over a single production season and only a few include physical properties of the substrates tested. Furthermore, substrates containing predominantly organic components decompose during crop production cycles producing changes in air and water ratios. In the commercial nursery industry, crops frequently remain in containers for longer periods than one growing season (18 to 24 months). Changes in air and water retention characteristics over extended periods can have significant effect on the health and vigor of crops held in containers for 1 year or more. Decomposition of organic components can create an overabundance of small particles that hold excessive amounts of water, thus creating limited air porosity. Mineral aggregates such as perlite, pumice, coarse sand, and calcined clays do not decompose, or breakdown slowly, when used in potting substrates. Blending aggregates with organic components can decrease changes in physical properties over time by dilution of organic components and preserving large pore spaces, thus helping to maintain structural integrity. Research is needed to evaluate changes in container substrates from initial physical properties to changes in air and water characteristics after a production cycle.",HortTechnology,,"USDA-ARS, U.S. Horticulture Research Laboratory, Ft. Pierce, FL, United States","Bilderback, T.E., USDA-ARS, U.S. Horticulture Research Laboratory, Ft. Pierce, FL, United States; Warren, S.L., USDA-ARS, U.S. Horticulture Research Laboratory, Ft. Pierce, FL, United States; Owen Jr., J.S., USDA-ARS, U.S. Horticulture Research Laboratory, Ft. Pierce, FL, United States; Albano, J.P., USDA-ARS, U.S. Horticulture Research Laboratory, Ft. Pierce, FL, United States",Arcillite; Container media; Physical properties; Pine bark; Sand; Sphagnum peat moss,Bryophyta; Sphagnum,Article,Scopus,,R,Scope irrelevant,Unclassified,,,,,,,N/A,,N/A,,,,,,
2-s2.0-26044473433,Kondro W.,Universite de Montréal in the dark about fraud.,2005,[No abstract available],CMAJ : Canadian Medical Association journal = journal de l'Association medicale canadienne,,,"Kondro, W.",,"article; Canada; education; employment; ethics; financial management; human; legal liability; manpower; menopause; nutrition; personnel management; privacy; publishing; scientific misconduct; standard; university; Employment; Financing, Government; Humans; Liability, Legal; Menopause; Nutrition Physiology; Personnel Selection; Privacy; Quebec; Retraction of Publication; Scientific Misconduct; Universities",Article,Scopus,English,R,Article format or year,Unclassified,,,,,,,N/A,,N/A,,,,,,
2-s2.0-27744493143,Begley S.,"Fluoridation, cancer: did researchers ask the right questions?",2005,[No abstract available],Wall Street journal (Eastern ed.),,,"Begley, S.",,adolescent; article; Biomedical and Behavioral Research; chemically induced disorder; child; fluoridation; Health Care and Public Health; human; male; methodology; osteosarcoma; personnel; Popular Approach/Source; risk assessment; scientific misconduct; Biomedical and Behavioral Research; Health Care and Public Health; Popular Approach/Source; Adolescent; Child; Fluoridation; Humans; Male; Osteosarcoma; Research Design; Research Personnel; Risk Assessment; Scientific Misconduct,Article,Scopus,English,R,Scope irrelevant,Unclassified,,,,,,,N/A,,N/A,,,,,,
2-s2.0-27744530515,"Rettinger D.A., Jordan A.E.","The relations among religion, motivation, and college cheating: A natural experiment",2005,"A natural experiment was conducted studying the relations among student cheating, motivation, religiosity, and attitudes toward cheating. Students enrolled in a dual religious/college curriculum were surveyed regarding their cheating behavior, attitudes toward cheating, religiosity, and learning/grade motivations toward classes. Business and liberal arts college students were represented. Results strongly support the following conclusions. First, grade orientation is associated with increases in self-reported cheating. Second, among these religious students, more religiosity correlates with reduced reports of cheating in all courses. This result appears to be due to the unique effect of religion on self-reported cheating rates and, depending on course content, on a reduction of grade orientation in religious students. Third, business students report more cheating than their liberal arts counterparts, even when taking the same courses. They have less critical attitudes toward cheating and greater grade orientation, both of which statistically contribute to this difference, but other factors are involved as well. Copyright © 2005, Lawrence Erlbaum Associates, Inc.",Ethics and Behavior,10.1207/s15327019eb1502_2,"Department of Psychology, Yeshiva University, New York, NY, United States; Department of Psychology, Middlebury College, United States; Yeshiva College, Yeshiva University, 500 W. 185th Street, New York, NY 10033, United States","Rettinger, D.A., Department of Psychology, Yeshiva University, New York, NY, United States, Yeshiva College, Yeshiva University, 500 W. 185th Street, New York, NY 10033, United States; Jordan, A.E., Department of Psychology, Middlebury College, United States",Academic integrity; Cheating; Motivation; Religiosity,,Article,Scopus,,R,Cheating (exclusively),Unclassified,,,,,,,N/A,,N/A,,,,,,
2-s2.0-27844556015,"Hao Q., Xu Y., Li W., Zhao X., Liu W.",Laser capture microdissection combined with RNA in vitro Linear amplification detecting the relevant genes of bladder cancer,2005,"Objective: Laser capture microdisection has become indispensable to the analysis of the difference of gene expression between human bladder transitional cell and bladder transitional cell carcinoma(BTCC). However, to obtain sufficient RNA from laser-capture microdissected cells is quite difficult. The study was designed to determine a feasible technical routine to isolate transitional cells from bladder membrane, separate carcinoma cells from stromal cells and to amplify the RNA isolated from laser-capturemicrodissected cells. Methods: Bladder transitional cell were obtained from frozen sections of bladder membrane applying LCM, by the same token, BTCC cells from frozen sections of BTCC tissue. Then RNA was extracted and linearly amplified in vitro. The expression levels of β-actin in primary total RNA and amplified RNA were detected using RT-PCR. Results: That RNA integrity was good after LCM was confirmed by control experiment I; By control experiment II, the correlation between the number of LCM shooting and RNA quantity under arranged conditions was preliminarily confirmed. About 0.5-2.5 kb RNA fragments were obtained after RNA amplification and β-actin levels were integral. Conclusion: Laser capture microdissection combined with RNA linear amplification in vitro can be successfully applied to obtain pure objective cells for research. The integrity of the amplified RNA is good and can be employed in further research. © Springer-Verlag Berlin Heidelberg 2005.",Chinese-German Journal of Clinical Oncology,10.1007/s10330-005-0380-y,"Pelvis Department, Tianjin Cancer Hospital, Tianjin Medical University, Tianjin 300060, China; Department of Urology, Second Hospital, Tianjin Medical University, Tianjin 300211, China; Medical Research Center, Xi'an Jiaotong University, Xi'an 710061, China","Hao, Q., Pelvis Department, Tianjin Cancer Hospital, Tianjin Medical University, Tianjin 300060, China; Xu, Y., Department of Urology, Second Hospital, Tianjin Medical University, Tianjin 300211, China; Li, W., Pelvis Department, Tianjin Cancer Hospital, Tianjin Medical University, Tianjin 300060, China; Zhao, X., Medical Research Center, Xi'an Jiaotong University, Xi'an 710061, China; Liu, W., Pelvis Department, Tianjin Cancer Hospital, Tianjin Medical University, Tianjin 300060, China",Aser capture microdissection; Bladder transitional cell; Bladder transitional cell carcinoma; RNA linear amplification in vitro; RT-PCR,,Article,Scopus,,R,Scope irrelevant,Unclassified,,,,,,,N/A,,N/A,,,,,,
2-s2.0-27844576744,"Crossgrove J., Scheer S.D., Conklin N.L., Jones J.M., Safrit R.D.",Organizational values perceived as evident among Ohio State University Extension personnel,2005,"The study reported here sought to determine the perceived evidence of organizational values and compare the perceived organizational values of Ohio State University Extension personnel. It investigated the organizational values according to the levels of perceived ""extremely evident"" and ""extremely valued."" The top five values perceived as ""extremely evident"" were: ""unbiased delivery of information,"" ""research-based programs,"" ""honesty/integrity in our work,"" ""an emphasis on excellence in educational programming,"" and ""helping people help themselves"" (range: 46.4% - 50.4%). The findings provide direction for OSU Extension to develop strong organizational values and target values not being expressed in the work environment. Copyright © by Extension Journal, Inc.",Journal of Extension,,"Ohio State University, Columbus, OH, United States; North Carolina State University, Raleigh, NC, United States","Crossgrove, J., Ohio State University, Columbus, OH, United States; Scheer, S.D., Ohio State University, Columbus, OH, United States; Conklin, N.L., Ohio State University, Columbus, OH, United States; Jones, J.M., Ohio State University, Columbus, OH, United States; Safrit, R.D., North Carolina State University, Raleigh, NC, United States",,,Article,Scopus,,R,Scope irrelevant,Unclassified,,,,,,,N/A,,N/A,,,,,,
2-s2.0-28244448508,"Zong Z., Wang S.-F.",Design of output feedback controller with robust integrity based on LMI approach,2005,"Integrity is an important research orientation of fault-tolerant control, and the study of robust integrity of systems with parameter uncertainties is of great significance in practice. In this paper, sufficient conditions for output feedback systems with robust integrity based on a [0, σ] model of failure and LMI approach are proposed. Dynamic output feedback controllers, which maintain the quadratic stability of closed-loop systems with parameter uncertainties and sensor failures, can be obtained by solving two matrix inequalities. The effectiveness of this method is demonstrated with a numerical example.",Kongzhi Lilun Yu Yingyong/Control Theory and Applications,,"Department of Automation, Tsinghua University, Beijing 100084, China","Zong, Z., Department of Automation, Tsinghua University, Beijing 100084, China; Wang, S.-F., Department of Automation, Tsinghua University, Beijing 100084, China",Fault-tolerant control; LMI (linear matrix inequality); Output feedback; Robust integrity,Fault-tolerant control; Linear matrix inequality; Output feedback; Robust integrity; Closed loop control systems; Control system analysis; Feedback control; Sensors; Uncertain systems,Article,Scopus,,R,Scope irrelevant,Unclassified,,,,,,,N/A,,N/A,,,,,,
2-s2.0-28444491480,"Sivakumar S.C., Robertson W., Artimy M., Aslam N.",A web-based remote interactive laboratory for internetworking education,2005,"A Web-based remote interactive laboratory (RIL) developed to deliver Internetworking laboratory experience to geographically remote graduate students is presented in this paper. The onsite Internetworking program employs hands-on laboratories in a group setting that correlates with the constructivist and collaborative pedagogical approach. This paper discusses the pedagogical and technical considerations that influence the design and implementation of the remote laboratory environment given the constraints of the special hardware and learning outcomes of the program. For wide-ranging usability, the remote Internetworking (INWK) laboratory uses de facto networking standards and commercial and broad-band Internet connectivity to ensure real-time secure interaction with equipment. A four-tier role architecture consisting of faculty, local facilitators, remote facilitators, and students has been determined appropriate to maintain academic integrity and ensure good quality of interaction with the remote laboratory. A survey employing a five-point scale has been devised to measure the usability of the remote access INWK laboratory. © 2005 IEEE.",IEEE Transactions on Education,10.1109/TE.2005.858393,"Department of Finance Information Systems and Management Science, Sobey School of Business, Saint Mary's University, Halifax, NS B3H 3C3, Canada; Internetworking Program, Dalhousie University, Halifax, NS B3J 1L1, Canada","Sivakumar, S.C., Department of Finance Information Systems and Management Science, Sobey School of Business, Saint Mary's University, Halifax, NS B3H 3C3, Canada; Robertson, W., Internetworking Program, Dalhousie University, Halifax, NS B3J 1L1, Canada; Artimy, M., Internetworking Program, Dalhousie University, Halifax, NS B3J 1L1, Canada; Aslam, N., Internetworking Program, Dalhousie University, Halifax, NS B3J 1L1, Canada",Online laboratory learning methods; Online networking education; Remote interactive laboratory (RIL); Remote laboratory facilitation,Distance education; Engineering education; Interactive computer systems; Internet; Online systems; Real time systems; World Wide Web; Online laboratory learning methods; Online networking education; Remote interactive laboratory; Remote laboratory facilitation; Computer aided instruction,Article,Scopus,,R,Scope irrelevant,Unclassified,,,,,,,N/A,,N/A,,,,,,
2-s2.0-28844505144,"Ouyang X., Liu J., Liu B., Jiang J., Bai Y., Huang L., Wang C., Zhang W.",The research of digital delay signal integrity in laser targeting,2005,"In order to solve the problem of signal integrity displayed in the design high-speeding digital circuit, a delay distribution method of high-speeding digital circuit was discussed in this paper. The maximum matching length of termination trace based on the transportation theory was set up, which was helpful to decrease the termination reflection in PCB designing. The crosstalk model and the termination means based on the electronics theory were also discussed, which was used to eliminate the crosstalk. Analyzing the composite disturbance of noise current In and transient load current IL, some restrain methods were taken, which ensured the delay signal integrity.",Guangzi Xuebao/Acta Photonica Sinica,,"State key laboratory of Transient optics Technology, Xi'an Institute of Optics and Precision Mechanics, Chinese Academy of Science, Xi'an 710068, China; Department of communication Engineering, Xian Institute of Posts and Telecoms, Xi'an 710061, China","Ouyang, X., State key laboratory of Transient optics Technology, Xi'an Institute of Optics and Precision Mechanics, Chinese Academy of Science, Xi'an 710068, China; Liu, J., State key laboratory of Transient optics Technology, Xi'an Institute of Optics and Precision Mechanics, Chinese Academy of Science, Xi'an 710068, China; Liu, B., State key laboratory of Transient optics Technology, Xi'an Institute of Optics and Precision Mechanics, Chinese Academy of Science, Xi'an 710068, China; Jiang, J., Department of communication Engineering, Xian Institute of Posts and Telecoms, Xi'an 710061, China; Bai, Y., State key laboratory of Transient optics Technology, Xi'an Institute of Optics and Precision Mechanics, Chinese Academy of Science, Xi'an 710068, China; Huang, L., State key laboratory of Transient optics Technology, Xi'an Institute of Optics and Precision Mechanics, Chinese Academy of Science, Xi'an 710068, China; Wang, C., State key laboratory of Transient optics Technology, Xi'an Institute of Optics and Precision Mechanics, Chinese Academy of Science, Xi'an 710068, China; Zhang, W., State key laboratory of Transient optics Technology, Xi'an Institute of Optics and Precision Mechanics, Chinese Academy of Science, Xi'an 710068, China",Composite disturbance; Delay distribution; Limitation means of 1max; Signal integrity,,Article,Scopus,,R,Scope irrelevant,Unclassified,,,,,,,N/A,,N/A,,,,,,
2-s2.0-29144443948,"Panofsky R., Moir M.",Halted by the archive: The impact of excessive archival restrictions on scholars,2005,"This article, written from the dual perspectives of a scholar and an archivist, considers the impact of excessive archival restrictions on scholars who seek access to primary material in order to ensure the integrity and accuracy of their research. Ruth Panofsky's view is that of a literary scholar whose work is informed by archival research. Michael Moir's view is that of a university archivist who has facilitated scholarly access to York University's archival holdings. Together, they argue for access to fonds held in public archives and the need for archival institutions to provide and lobby for such access. In this article, author Panofsky draws on her recent work with the Adele Wiseman fonds, held in the Clara Thomas Archives, Scott Library, York University. Since that research was undertaken with great difficulty, the narrative that follows may dishearten some scholars. The eventual overcoming of the barrier of restricted access to archival material, which, for a number of years, hindered the progress of the Wiseman project, was due largely to dogged determination - her own, and that of the archival staff of York University. As this article shows, when scholars and archivists alike recognize 'the archival home' as a site 'of constant discovery and excitement,' the viable outcome is research that is both vivid and sound.",Journal of Scholarly Publishing,,"English Department, Ryerson University, Toronto, Ont., Canada; Department of Archives and Special Collections, York University, Toronto, Ont., Canada; University of Toronto, Faculty of Information Studies, Toronto, Ont., Canada; Champaign Society, Toronto, Ont., Canada","Panofsky, R., English Department, Ryerson University, Toronto, Ont., Canada; Moir, M., Department of Archives and Special Collections, York University, Toronto, Ont., Canada, University of Toronto, Faculty of Information Studies, Toronto, Ont., Canada, Champaign Society, Toronto, Ont., Canada",,,Article,Scopus,,R,Scope irrelevant,Unclassified,,,,,,,N/A,,N/A,,,,,,
2-s2.0-29144493766,"Grayson J.P., Myles R.",How research ethics boards are undermining survey research on Canadian university students,2005,"In Canada, all research conducted by individuals associated with universities must be subjected to review by research ethics boards (REB). Unfortunately, decisions reached by REBs may seriously compromise the integrity of university-based research. In this paper attention will focus on how requirements of REBs and a legal department in four Canadian universities affected response rates to a survey of domestic and international students. It will be shown that in universities in which students were sent a legalistic cover letter to a mail survey, or were required to sign a consent form, lower response rates were achieved than in universities in which students were sent a relatively friendly letter. In turn, lower response rates resulted in: sample characteristics that deviated from population characteristics; a reduction in the possibility of testing research hypotheses; and increased survey costs. As a consequence, it is argued that the unreasonable demands of REBs are seriously compromising the quality of research that can be carried out on Canadian university students. © Springer 2005.",Journal of Academic Ethics,10.1007/s10805-005-9005-x,"School of Social Science, Atkinson Faculty of Liberal and Professional Studies, York University, Toronto, Canada; Institute for Social Research, York University, Toronto, Canada","Grayson, J.P., School of Social Science, Atkinson Faculty of Liberal and Professional Studies, York University, Toronto, Canada; Myles, R., Institute for Social Research, York University, Toronto, Canada",Research ethics; Response rates; Students; Surveys,,Article,Scopus,,R,"Research ethics, bioethics, clinical ethics, or ethical role of universities in society",Unclassified,,,,,,,N/A,,N/A,,,,,,
2-s2.0-29244452652,"Helgesson G., Johnsson L.",The right to withdraw consent to research on biobank samples,2005,"Ethical guidelines commonly state that research subjects should have a right to withdraw consent to participate. According to the guidelines we have studied, this right applies also to research on biological samples. However, research conducted on human subjects themselves differs in important respects from research on biological samples. It is therefore not obvious that the same rights should be granted research participants in the two cases. This paper investigates arguments for and against granting a right to withdraw consent to research on biobank samples. We conclude that (1) there are no explicit arguments for such a right in the guidelines we have studied, (2) the arguments against such a right are inconclusive, (3) considerations of autonomy, privacy, personal integrity, and trust in medical research provide sufficient reasons for granting a right to withdraw consent to research on biobank samples, (4) in certain cases, research participants should be allowed to waive this right. © Springer 2005.","Medicine, Health Care and Philosophy",10.1007/s11019-005-0397-6,"Centre of Bioethics at Karolinska Institutet, Uppsala University, Department of Public Health and Caring Sciences, Uppsala Science Park, SE-751 85 Uppsala, Sweden","Helgesson, G., Centre of Bioethics at Karolinska Institutet, Uppsala University, Department of Public Health and Caring Sciences, Uppsala Science Park, SE-751 85 Uppsala, Sweden; Johnsson, L., Centre of Bioethics at Karolinska Institutet, Uppsala University, Department of Public Health and Caring Sciences, Uppsala Science Park, SE-751 85 Uppsala, Sweden",Autonomy; Biobank research; Biological samples; Consent; Personal integrity; Privacy; Trust; Withdrawal,"Analytical Approach; article; Biomedical and Behavioral Research; ethics; genetics; Genetics and Reproduction; health care facility; human; human relation; human rights; informed consent; organization and management; personal autonomy; privacy; refusal to participate; research ethics; research subject; Analytical Approach; Biomedical and Behavioral Research; Genetics and Reproduction; Biological Specimen Banks; Ethics, Research; Genetic Research; Human Rights; Humans; Informed Consent; Personal Autonomy; Privacy; Refusal to Participate; Research Subjects; Researcher-Subject Relations",Article,Scopus,,R,"Research ethics, bioethics, clinical ethics, or ethical role of universities in society",Unclassified,,,,,,,N/A,,N/A,,,,,,
2-s2.0-31144447637,Pate J.,The changing contours of the psychological contract: Unpacking context and circumstances of breach,2006,"Purpose - The purpose of this paper is to propose a processual framework of psychological contract breach, which maps holistically the interactions among concepts drawn from the trust and justice literature. However, the price of a holistic picture is frequently a lack of depth of analysis of any single variable, and consequently the second part of the paper seeks to unpack a central variable, circumstances of breach. Design/ methodological approach - Draws on findings from a four-year qualitative study and investigates the psychological contract in situ. The issue of circumstances of breach was explored inductively by applying in-depth employee case histories using theory-based sampling. Findings - Key findings indicate that breach may occur as a result of direct or indirect organisational actions. Further the degree of reaction may differ according to the type of trigger (i.e. a distributive, procedural or interactional justice issue) and also the extent to which the organisation is held responsible. Research limitations/Implications - Based on an in-depth study of one organisation over time; further research is required to ascertain the generalisability of the key findings. Practical implications - The implications for the practice of management surround the issue of unanticipated results of actions. Changes to substantive, distributive justice issues are likely to result in psychological contract violation or rupture unless handled with care. The repercussions of relationship fracture include diminished employees attitude and, perhaps more importantly for the organisation, negative behaviour. Originality/value - The key contribution of the paper is that it presents a new model of psychological contract and elucidates a key aspect of the holistic model using empirical data. © Emerald Group Publishing Limited.",Journal of European Industrial Training,10.1108/03090590610643860,"School of Business and Management, University of Glasgow, Glasgow, United Kingdom; University of Glasgow, United Kingdom","Pate, J., School of Business and Management, University of Glasgow, Glasgow, United Kingdom, University of Glasgow, United Kingdom",Conditions of employment; Psychological contracts; Work psychology,,Article,Scopus,,R,Scope irrelevant,Unclassified,,,,,,,N/A,,N/A,,,,,,
2-s2.0-31344481485,"Mastrangelo D., Loré C.","The growth of a lie and the end of ""conventional"" medicine",2005,"Throughout its over 200-year history, homeopathy has been proven effective in treating diseases for which conventional medicine has little to offer. However, given its low cost, homeopathy has always represented a serious challenge and a constant threat to the profits of drug companies. Moreover, since drug companies represent the most relevant source of funding for biomedical research worldwide, they are in a privileged position to finance detractive campaigns against homeopathy by manipulating the media as well as academic institutions and the medical establishment. The basic argument against homeopathy is that in some controlled clinical trials (CCTs), comparison with conventional treatments shows that its effects are not superior to those of placebo. Against this thesis we argue that a) CCT methodology cannot be applied to homeopathy, b) misconduct and fraud are common in CCTs, c) adverse drug reactions and side effects show that CCT methodology is deeply flawed, d) an accurate testing of homeopathic remedies requires more sophisticated techniques, e) the placebo effect is no more ""plausible"" than homeopathy, and its real nature is still unexplained, and f) the placebo effect is nevertheless a ""cure"" and, as such, worthy of further investigation and analysis. It is concluded that no arguments presently exist against homeopathy and that the recurrent campaigns against it represent the specific interests of the pharmaceutical industry which, in this way, strives to protect its profits from the ""threat"" of a safer, more effective, and much less expensive treatment modality. © Med Sci Monit, 2005.",Medical Science Monitor,,"Department of Ophthalmology, University of Siena, Italy; Department of Forensic Medicine, University of Siena, ITA, Italy","Mastrangelo, D., Department of Ophthalmology, University of Siena, Italy; Loré, C., Department of Forensic Medicine, University of Siena, ITA, Italy",Clinical research; Controlled clinical trials; Homeopathic remedies; Homeopathy; Law of similars; Pharmaceutical industries; Pharmacogenetics; Placebo,placebo; allopathy; article; clinical trial; drug industry; food and drug administration; health care; health care organization; homeopathy; human; medical research; methodology; nonhuman; Controlled Clinical Trials; Homeopathy; Humans; Placebo Effect; Scientific Misconduct,Article,Scopus,English,R,"Research ethics, bioethics, clinical ethics, or ethical role of universities in society",Unclassified,,,,,,,N/A,,N/A,,,,,,
2-s2.0-31544473462,Leinhos M.,The US national bioethics advisory commission as a boudary organization,2005,"Public bioethics advisory bodies have been a staple of US public policy for addressing public biotechnology-related controversies, in spite of the limited impact these bodies have had on policy-making. These advisory bodies serve an important tacit function as boundary organizations that stabilize the border between science and politics, preserving the autonomy of science from incursion by other societal stakeholders. In this paper the boundary work of the US National Bioethics Advisory Commission is examined at the border of science and ethics, in its deliberations on embryonic stem cell research. The coupling of scientific and ethical uncertainty, and that of research productivity and integrity assurance in the Commission's deliberations is described. It is argued that the Commission's boundary work reinforced the authority of science and marginalized conflicting civic-sector concerns. © Beech Tree Publishing 2005.",Science and Public Policy,10.3152/147154305781779308,"Center for the Study of Higher Education, University of Arizona, Tucson, AZ, United States; 273 9th St NE 2, Atlanta, GA 30309, United States","Leinhos, M., Center for the Study of Higher Education, University of Arizona, Tucson, AZ, United States, 273 9th St NE 2, Atlanta, GA 30309, United States",,biotechnology; ethics; organizational framework,Article,Scopus,,R,"Research ethics, bioethics, clinical ethics, or ethical role of universities in society",Unclassified,,,,,,,N/A,,N/A,,,,,,
2-s2.0-32944458359,Couzin J.,Scientific misconduct. MIT terminates researcher over data fabrication.,2005,[No abstract available],Science.,,,"Couzin, J.",,article; financial management; publication; publishing; RNA interference; scientific misconduct; United States; university; Massachusetts; Periodicals; Publishing; Research Support; RNA Interference; Scientific Misconduct; Universities,Article,Scopus,,R,Article format or year,Unclassified,,,,,,,N/A,,N/A,,,,,,
2-s2.0-32944476213,Travis J.,Scientific publishing. Retracted papers spur million-dollar lawsuit.,2005,[No abstract available],Science.,,,"Travis, J.",,article; enzymology; jurisprudence; plant; publishing; scientific misconduct; United States; writing; Authorship; Jurisprudence; Plants; Publishing; Retraction of Publication; Scientific Misconduct; United States,Article,Scopus,English,R,Article format or year,Unclassified,,,,,,,N/A,,N/A,,,,,,
2-s2.0-33644669629,Maloney D.M.,Privacy of researchers versus public's right to know their names.,2005,[No abstract available],Human research report,,"The Deem Corporation, P.O. Box 44069, Omaha, NE 68144, USA.","Maloney, D.M., The Deem Corporation, P.O. Box 44069, Omaha, NE 68144, USA.",,access to information; article; Biomedical and Behavioral Research; government; human; legal aspect; personnel; privacy; scientific misconduct; United States; whistleblowing; Biomedical and Behavioral Research; Access to Information; Humans; Privacy; Research Personnel; Scientific Misconduct; United States; United States Dept. of Health and Human Services; Whistleblowing,Article,Scopus,English,R,Scope irrelevant,Unclassified,,,,,,,N/A,,N/A,,,,,,
2-s2.0-33644749328,Klein G.,A denial with catastrophic consequences [En förnekelse med katastrofala konsekvenser.],2005,[No abstract available],Läkartidningen.,,"Mikrobiologiskt och tumörbiologiskt centrum, Karolinska institutet, Stockholm.","Klein, G., Mikrobiologiskt och tumörbiologiskt centrum, Karolinska institutet, Stockholm.",,"acquired immune deficiency syndrome; art; article; denial; epidemic; health care policy; history; human; Human immunodeficiency virus infection; medical research; public opinion; public relations; scientific misconduct; South Africa; United States; Acquired Immunodeficiency Syndrome; Biomedical Research; Denial (Psychology); Disease Outbreaks; Health Policy; History, 20th Century; HIV Infections; Humans; Interprofessional Relations; Portraits; Public Opinion; Scientific Misconduct; South Africa; United States",Article,Scopus,Swedish,R,Accessibility and language,Unclassified,,,,,,,N/A,,N/A,,,,,,
2-s2.0-33644809772,Maloney D.M.,New federal guidance adds duties for institutional review boards (IRBs).,2005,[No abstract available],Human research report,,"The Deem Corporation, P.O. Box 44069, Omaha, NE 68144, USA.","Maloney, D.M., The Deem Corporation, P.O. Box 44069, Omaha, NE 68144, USA.",,"article; Biomedical and Behavioral Research; clinical trial; confidentiality; ethics; government regulation; human; human experiment; informed consent; Internet; Legal Approach; legal aspect; practice guideline; professional standard; public health service; standard; United States; Biomedical and Behavioral Research; Legal Approach; Clinical Trials; Confidentiality; Ethical Review; Ethics Committees, Research; Government Regulation; Guidelines; Human Experimentation; Humans; Informed Consent; Internet; United States; United States Office of Research Integrity",Article,Scopus,,R,Accessibility and language,Unclassified,,,,,,,N/A,,N/A,,,,,,
2-s2.0-33644815783,Maloney D.M.,"IRBs, human subjects, and reporting adverse events.",2005,[No abstract available],Human research report,,"The Deem Corporation, P.O. Box 44069, Omaha, NE 68144, USA.","Maloney, D.M., The Deem Corporation, P.O. Box 44069, Omaha, NE 68144, USA.",,"article; Biomedical and Behavioral Research; clinical trial; government regulation; human; human experiment; Legal Approach; legal aspect; mandatory reporting; practice guideline; professional standard; public health service; research subject; United States; Biomedical and Behavioral Research; Legal Approach; Clinical Trials; Ethics Committees, Research; Government Regulation; Guidelines; Human Experimentation; Humans; Mandatory Reporting; Research Subjects; United States; United States Office of Research Integrity",Article,Scopus,,R,Accessibility and language,Unclassified,,,,,,,N/A,,N/A,,,,,,
2-s2.0-33644818049,Eaton L.,Norwegian researcher admits that his data were faked.,2006,[No abstract available],BMJ (Clinical research ed.),,,"Eaton, L.",,"nonsteroid antiinflammatory agent; article; Biomedical and Behavioral Research; data base; information processing; mouth tumor; Norway; scientific misconduct; Biomedical and Behavioral Research; Anti-Inflammatory Agents, Non-Steroidal; Data Collection; Databases; Mouth Neoplasms; Norway; Scientific Misconduct",Article,Scopus,English,R,Article format or year,Unclassified,,,,,,,N/A,,N/A,,,,,,
2-s2.0-33644820137,Maloney D.M.,Both accused researchers and whistle-blowers stay anonymous when no misconduct is found.,2005,[No abstract available],Human research report,,"The Deem Corporation, P.O. Box 44069, Omaha, NE 68144, USA.","Maloney, D.M., The Deem Corporation, P.O. Box 44069, Omaha, NE 68144, USA.",,article; Biomedical and Behavioral Research; human; interpersonal communication; Legal Approach; legal aspect; personnel; privacy; public health service; scientific misconduct; United States; whistleblowing; Biomedical and Behavioral Research; Legal Approach; Disclosure; Humans; Privacy; Research Personnel; Scientific Misconduct; United States; United States Office of Research Integrity; Whistleblowing,Article,Scopus,,R,Accessibility and language,Unclassified,,,,,,,N/A,,N/A,,,,,,
2-s2.0-33644820819,Parry J.,Cloning pioneer denies intentionally falsifying results.,2006,[No abstract available],BMJ (Clinical research ed.),,,"Parry, J.",,article; embryo research; Korea; scientific misconduct; stem cell; Embryo Research; Korea; Scientific Misconduct; Stem Cells,Article,Scopus,English,R,Article format or year,Unclassified,,,,,,,N/A,,N/A,,,,,,
2-s2.0-33644822782,"Couzin J., Holden C., Chong S.",Scientific publishing. Hwang aftereffects reverberate at journals.,2006,[No abstract available],Science.,,,"Couzin, J.; Holden, C.; Chong, S.",,"animal; article; cloning; cytology; embryo; human; publication; publishing; scientific misconduct; stem cell; Animals; Cloning, Organism; Editorial Policies; Embryo; Humans; Periodicals; Publishing; Scientific Misconduct; Stem Cells",Article,Scopus,English,R,Article format or year,Unclassified,,,,,,,N/A,,N/A,,,,,,
2-s2.0-33644831073,Maloney D.M.,New guidance on when and how to report human research problems.,2005,[No abstract available],Human research report,,"The Deem Corporation, P.O. Box 44069, Omaha, NE 68144, USA.","Maloney, D.M., The Deem Corporation, P.O. Box 44069, Omaha, NE 68144, USA.",,"article; Biomedical and Behavioral Research; decision support system; government regulation; human; human experiment; Legal Approach; legal aspect; mandatory reporting; organization and management; practice guideline; professional standard; public health service; research subject; risk; risk management; United States; Biomedical and Behavioral Research; Legal Approach; Decision Support Techniques; Ethics Committees, Research; Government Regulation; Guideline Adherence; Guidelines; Human Experimentation; Humans; Mandatory Reporting; Research Subjects; Risk; Risk Management; United States; United States Office of Research Integrity",Article,Scopus,,R,Accessibility and language,Unclassified,,,,,,,N/A,,N/A,,,,,,
2-s2.0-33644842579,Wade N.,"Cancer study was made up, journal says.",2006,[No abstract available],The New York times,,,"Wade, N.",,article; Biomedical and Behavioral Research; financial management; health care organization; human; mouth tumor; Norway; personnel; Popular Approach/Source; scientific misconduct; United States; Biomedical and Behavioral Research; Popular Approach/Source; Humans; Mouth Neoplasms; National Institutes of Health (U.S.); Norway; Research Personnel; Research Support; Scientific Misconduct; United States,Article,Scopus,English,R,Article format or year,Unclassified,,,,,,,N/A,,N/A,,,,,,
2-s2.0-33644845998,Normile D.,Scientific conduct. Panel discredits findings of Tokyo university team.,2006,[No abstract available],Science,10.1126/science.311.5761.595,,"Normile, D.",,"RNA; article; health care organization; Japan; medical research; publishing; scientific misconduct; standard; writing; Authorship; Biomedical Research; Publishing; RNA; Scientific Misconduct; Societies, Scientific; Tokyo",Article,Scopus,English,R,Article format or year,Unclassified,,,,,,,N/A,,N/A,,,,,,
2-s2.0-33644846253,Taube A.,Putting a P for fraud [Att sätta P för fusk],2006,[No abstract available],Lakartidningen,,"Institutionen För Informationsvetenskap, Uppsala Universitet, Sweden","Taube, A., Institutionen För Informationsvetenskap, Uppsala Universitet, Sweden",,"article; forgery; human; probability; scientific misconduct; statistical analysis; Data Interpretation, Statistical; Fraud; Humans; Probability; Scientific Misconduct",Article,Scopus,Swedish,R,Accessibility and language,Unclassified,,,,,,,N/A,,N/A,,,,,,
2-s2.0-33644855965,Pearson H.,Forensic software traces tweaks to images.,2006,[No abstract available],Nature.,,,"Pearson, H.",,algorithm; article; computer program; forensic science; image enhancement; methodology; publication; publishing; scientific misconduct; standard; Algorithms; Forensic Sciences; Image Enhancement; Periodicals; Publishing; Scientific Misconduct; Software,Article,Scopus,English,R,Article format or year,Unclassified,,,,,,,N/A,,N/A,,,,,,
2-s2.0-33644869712,Parry J.,University clears scientist of misconduct but says his conduct was misbehaviour.,2006,[No abstract available],BMJ (Clinical research ed.),,,"Parry, J.",,article; legal aspect; medical research; scientific misconduct; stem cell; United States; Biomedical Research; Pennsylvania; Scientific Misconduct; Stem Cells,Article,Scopus,English,R,Article format or year,Unclassified,,,,,,,N/A,,N/A,,,,,,
2-s2.0-33644871925,Holden C.,Korean stem cell scandal. Schatten: Pitt panel finds 'misbehavior' but not misconduct.,2006,[No abstract available],Science,10.1126/science.311.5763.928,,"Holden, C.",,"article; Biomedical and Behavioral Research; cytology; embryo; ethics; history; human; Korea; medical research; scientific misconduct; standard; stem cell; United States; university; writing; Biomedical and Behavioral Research; Authorship; Biomedical Research; Embryo; History, 21st Century; Humans; Korea; Pennsylvania; Scientific Misconduct; Stem Cells; Universities",Article,Scopus,English,R,Article format or year,Unclassified,,,,,,,N/A,,N/A,,,,,,
2-s2.0-33644880915,Mathews A.W.,"Ghost story: at medical journals, writers paid by industry play big role.",2005,[No abstract available],Wall Street journal (Eastern ed.),,,"Mathews, A.W.",,"article; Biomedical and Behavioral Research; drug industry; economics; ethics; financial management; forgery; human; interpersonal communication; medical research; personnel; Popular Approach/Source; publication; publishing; recumbency; scientific misconduct; standard; writing; Biomedical and Behavioral Research; Popular Approach/Source; Authorship; Biomedical Research; Deception; Disclosure; Drug Industry; Editorial Policies; Fraud; Humans; Journalism, Medical; Periodicals; Research Personnel; Research Support; Scientific Misconduct; Writing",Article,Scopus,English,R,Article format or year,Unclassified,,,,,,,N/A,,N/A,,,,,,
2-s2.0-33644946981,Vastag B.,"Cancer fraud case stuns research community, prompts reflection on peer review process.",2006,[No abstract available],Journal of the National Cancer Institute.,,,"Vastag, B.",,"article; economics; financial management; health care organization; human; medical research; mouth tumor; Norway; peer group; peer review; publication; publishing; Scandinavia; scientific misconduct; standard; United States; Biomedical Research; Financing, Organized; Humans; Journalism, Medical; Mouth Neoplasms; National Institutes of Health (U.S.); Norway; Peer Group; Peer Review; Periodicals; Research Support; Scandinavia; Scientific Misconduct; United States",Article,Scopus,English,R,Article format or year,Unclassified,,,,,,,N/A,,N/A,,,,,,
2-s2.0-33644950289,"Wade N., Sang-Hun C.","Human cloning was all faked, Koreans report.",2006,[No abstract available],The New York times,,,"Wade, N.; Sang-Hun, C.",,"article; Biomedical and Behavioral Research; cell line; cloning; cytology; embryo; embryo research; financial management; Genetics and Reproduction; human; Korea; personnel; Popular Approach/Source; publication; scientific misconduct; stem cell; university; Biomedical and Behavioral Research; Genetics and Reproduction; Popular Approach/Source; Cell Line; Cloning, Organism; Embryo; Embryo Research; Financing, Government; Humans; Korea; Periodicals; Research Personnel; Scientific Misconduct; Stem Cells; Universities",Article,Scopus,English,R,Article format or year,Unclassified,,,,,,,N/A,,N/A,,,,,,
2-s2.0-33644956891,"Sang-Hun C., Wade N.",Korean cloning scientist quits over report he faked research; backers of stem cell work fear larger setback.,2005,[No abstract available],The New York times,,,"Sang-Hun, C.; Wade, N.",,"article; Biomedical and Behavioral Research; cloning; cytology; embryo; embryo research; Genetics and Reproduction; human; Korea; personnel; Popular Approach/Source; publishing; scientific misconduct; stem cell; university; Biomedical and Behavioral Research; Genetics and Reproduction; Popular Approach/Source; Cloning, Organism; Embryo; Embryo Research; Humans; Korea; Research Personnel; Retraction of Publication; Scientific Misconduct; Stem Cells; Universities",Article,Scopus,English,R,Article format or year,Unclassified,,,,,,,N/A,,N/A,,,,,,
2-s2.0-33644958580,Krugman P.,"Drugs, devices and doctors.",2005,[No abstract available],The New York times,,,"Krugman, P.",,"drug; apparatus, equipment and supplies; article; Biomedical and Behavioral Research; Cleveland Clinic; commercial phenomena; conflict of interest; economics; ethics; financial management; Health Care and Public Health; health care cost; hospital; human; industry; personnel; physician; Popular Approach/Source; public relations; scientific misconduct; United States; Biomedical and Behavioral Research; Cleveland Clinic; Health Care and Public Health; Popular Approach/Source; Conflict of Interest; Entrepreneurship; Equipment and Supplies; Financial Support; Health Care Sector; Hospitals; Humans; Industry; Interprofessional Relations; Pharmaceutical Preparations; Physicians; Research Personnel; Scientific Misconduct; United States",Article,Scopus,English,R,Article format or year,Unclassified,,,,,,,N/A,,N/A,,,,,,
2-s2.0-33644959143,Brooke J.,Korean leaves cloning center in ethics furor; admits lying on source of donated eggs.,2005,[No abstract available],The New York times,,,"Brooke, J.",,"article; Biomedical and Behavioral Research; cloning; cytology; economics; embryo; embryo research; ethics; female; Genetics and Reproduction; history; human; Korea; oocyte donation; personnel; Popular Approach/Source; scientific misconduct; stem cell; Biomedical and Behavioral Research; Genetics and Reproduction; Popular Approach/Source; Cloning, Organism; Embryo; Embryo Research; Female; History, 21st Century; Humans; Korea; Oocyte Donation; Research Personnel; Scientific Misconduct; Stem Cells",Article,Scopus,English,R,Article format or year,Unclassified,,,,,,,N/A,,N/A,,,,,,
2-s2.0-33644959839,Wade N.,Korean scientist said to admit fabrication in a cloning study.,2005,[No abstract available],The New York times,,,"Wade, N.",,"article; Biomedical and Behavioral Research; cell line; cloning; embryo research; embryology; ethics; Genetics and Reproduction; human; Korea; personnel; Popular Approach/Source; scientific misconduct; stem cell; Biomedical and Behavioral Research; Genetics and Reproduction; Popular Approach/Source; Cell Line; Cloning, Organism; Embryo Research; Embryology; Humans; Korea; Research Personnel; Scientific Misconduct; Stem Cells",Article,Scopus,English,R,Article format or year,Unclassified,,,,,,,N/A,,N/A,,,,,,
2-s2.0-33644961406,Wade N.,Clone scientist relied on peers and Korean pride.,2005,[No abstract available],The New York times,,,"Wade, N.",,"article; Biomedical and Behavioral Research; cell line; cloning; cytology; embryo; embryo research; financial management; Genetics and Reproduction; human; Korea; laboratory; organization and management; personnel; Popular Approach/Source; publication; scientific misconduct; stem cell; university; whistleblowing; Biomedical and Behavioral Research; Genetics and Reproduction; Popular Approach/Source; Cell Line; Cloning, Organism; Embryo; Embryo Research; Financing, Government; Humans; Korea; Laboratories; Periodicals; Research Personnel; Scientific Misconduct; Stem Cells; Universities; Whistleblowing",Article,Scopus,English,R,Article format or year,Unclassified,,,,,,,N/A,,N/A,,,,,,
2-s2.0-33644962311,Kolata G.,"Clone scandal: ""a tragic turn"" for science.",2005,[No abstract available],The New York times,,,"Kolata, G.",,"article; attitude; Biomedical and Behavioral Research; cloning; cytology; embryo; embryo research; ethicist; ethics; Genetics and Reproduction; human; Korea; personnel; Popular Approach/Source; scientific misconduct; stem cell; Biomedical and Behavioral Research; Genetics and Reproduction; Popular Approach/Source; Attitude; Cloning, Organism; Embryo; Embryo Research; Ethicists; Humans; Korea; Research Personnel; Scientific Misconduct; Stem Cells",Article,Scopus,English,R,Article format or year,Unclassified,,,,,,,N/A,,N/A,,,,,,
2-s2.0-33644964700,Berenson A.,Medical journal criticizes Merck over Vioxx data.,2005,[No abstract available],The New York times,,,"Berenson, A.",,cyclooxygenase 2 inhibitor; lactone; rofecoxib; sulfone; article; Biomedical and Behavioral Research; clinical trial; drug industry; ethics; human; Merck Inc.; New England Journal of Medicine; personnel; Popular Approach/Source; publication; scientific misconduct; United States; Biomedical and Behavioral Research; Merck Inc.; New England Journal of Medicine; Popular Approach/Source; Clinical Trials; Cyclooxygenase 2 Inhibitors; Drug Industry; Humans; Lactones; Periodicals; Research Personnel; Scientific Misconduct; Sulfones; United States,Article,Scopus,English,R,Article format or year,Unclassified,,,,,,,N/A,,N/A,,,,,,
2-s2.0-33644964892,Rosenthal E.,Under a microscope: high-profile cases bring new scrutiny to science's superstars.,2005,[No abstract available],The New York times,,,"Rosenthal, E.",,"article; Biomedical and Behavioral Research; cloning; competitive behavior; ethics; face; France; human; Korea; mass medium; motivation; personnel; physician; Popular Approach/Source; professional misconduct; psychological aspect; public figure; scientific misconduct; transplantation; Biomedical and Behavioral Research; Popular Approach/Source; Cloning, Organism; Competitive Behavior; Face; Famous Persons; France; Humans; Korea; Mass Media; Motivation; Physicians; Professional Misconduct; Research Personnel; Scientific Misconduct; Transplantation",Article,Scopus,English,R,Article format or year,Unclassified,,,,,,,N/A,,N/A,,,,,,
2-s2.0-33644966176,"Altman L., Broad W.J.","Global trend: more science, more fraud.",2005,[No abstract available],The New York times,,,"Altman, L.; Broad, W.J.",,"article; Biomedical and Behavioral Research; cloning; forgery; government; government regulation; human; international cooperation; Korea; medical research; Popular Approach/Source; publication; publishing; research ethics; scientific misconduct; social control; statistics; United States; university; Biomedical and Behavioral Research; Popular Approach/Source; Biomedical Research; Cloning, Organism; Editorial Policies; Ethics, Research; Federal Government; Fraud; Government Regulation; Humans; Internationality; Korea; Periodicals; Scientific Misconduct; Social Control, Informal; United States; Universities",Article,Scopus,English,R,Article format or year,Unclassified,,,,,,,N/A,,N/A,,,,,,
2-s2.0-33644972574,[No author name available],Con men in lab coats.,2006,[No abstract available],Scientific American.,,,,,"article; cloning; cytology; embryo; human; scientific misconduct; stem cell; Cloning, Organism; Embryo; Humans; Scientific Misconduct; Stem Cells",Article,Scopus,English,R,Article format or year,Unclassified,,,,,,,N/A,,N/A,,,,,,
2-s2.0-33644987231,Beardsley S.,Down in flames.,2006,[No abstract available],Scientific American.,,,"Beardsley, S.",,"article; cloning; cytology; embryo; ethics; human; public opinion; research ethics; scientific misconduct; stem cell; Cloning, Organism; Embryo; Ethics, Research; Humans; Public Opinion; Scientific Misconduct; Stem Cells",Article,Scopus,English,R,Article format or year,Unclassified,,,,,,,N/A,,N/A,,,,,,
2-s2.0-33645032387,"Alpert J.E., Biggs M.M., Davis L., Shores-Wilson K., Harlan W.R., Schneider G.W., Ford A.L., Farabaugh A., Stegman D., Ritz A.L., Husain M.M., MacLeod L., Wisniewski S.R., Rush A.J.",Enrolling research subjects from clinical practice: Ethical and procedural issues in the Sequenced Treatment Alternatives to Relieve Depression (STAR*D) trial,2006,"The Sequenced Treatment Alternatives to Relieve Depression (STAR*D) trial is a multi-site effectiveness study funded by the National Institute of Mental Health (NIMH) with the aim of identifying successful, acceptable and cost-effective treatment strategies for outpatients with unremitted depression. With enrollment of 4041 adults with major depressive disorder (MDD), it is the largest controlled psychiatric treatment study ever undertaken. In the course of developing procedures to ensure that ambitious enrollment goals were met, a number of ethical and practical issues became apparent that underscore the conflicts between effectiveness research and human subject protections. These are delineated as they relate to study design; eligibility criteria; incentives to subjects; investigators and clinical sites; the complementary roles of clinical research coordinators (CRCs) and study clinicians; and recruitment and consent procedures. The STAR*D trial exemplifies the interplay and tension between those strategies that integrate research and clinical aims and roles in the service of enhancing external validity, site participation, and recruitment and retention versus those strategies that differentiate research and clinical treatment in the service of research integrity and human subject protections. We hope that a discussion of these key challenges and dilemmas and how they have been addressed will help inform future discussions concerning design and conduct of ethical effectiveness trials designed to optimize care in real world clinical settings. © 2005 Elsevier Ireland Ltd. All rights reserved.",Psychiatry Research,10.1016/j.psychres.2005.04.007,"Massachusetts General Hospital, Depression Clinical and Research Program, 50 Staniford Street, Boston, MA 02114, United States; Department of Psychiatry, University of Texas Southwestern Medical Center, 5323 Harry Hines Boulevard, Dallas, TX 75390-9086, United States; Veterans Administration Medical Center, Department of Research, 3701 Loop Road East, Tuscaloosa, AL 35404, United States; University of Alabama at Birmingham, 700 19th St. South, Birmingham, AL 35233, United States; National Institute of Mental Health, MSC 9633, 6001 Executive Boulevard, Bethesda, MD 20892-MSC, United States; University of North Carolina at Chapel Hill, CB #7160, Medical School Wing B, Chapel Hill, NC 27599-7160, United States; Epidemiology Data Coordinating Center, University of Pittsburgh, 127 Parran Hall, 130 DeSoto Street, Pittsburgh, PA 15261, United States","Alpert, J.E., Massachusetts General Hospital, Depression Clinical and Research Program, 50 Staniford Street, Boston, MA 02114, United States; Biggs, M.M., Department of Psychiatry, University of Texas Southwestern Medical Center, 5323 Harry Hines Boulevard, Dallas, TX 75390-9086, United States; Davis, L., Veterans Administration Medical Center, Department of Research, 3701 Loop Road East, Tuscaloosa, AL 35404, United States, University of Alabama at Birmingham, 700 19th St. South, Birmingham, AL 35233, United States; Shores-Wilson, K., Department of Psychiatry, University of Texas Southwestern Medical Center, 5323 Harry Hines Boulevard, Dallas, TX 75390-9086, United States; Harlan, W.R., National Institute of Mental Health, MSC 9633, 6001 Executive Boulevard, Bethesda, MD 20892-MSC, United States; Schneider, G.W., Department of Psychiatry, University of Texas Southwestern Medical Center, 5323 Harry Hines Boulevard, Dallas, TX 75390-9086, United States; Ford, A.L., University of North Carolina at Chapel Hill, CB #7160, Medical School Wing B, Chapel Hill, NC 27599-7160, United States; Farabaugh, A., Massachusetts General Hospital, Depression Clinical and Research Program, 50 Staniford Street, Boston, MA 02114, United States; Stegman, D., Department of Psychiatry, University of Texas Southwestern Medical Center, 5323 Harry Hines Boulevard, Dallas, TX 75390-9086, United States; Ritz, A.L., National Institute of Mental Health, MSC 9633, 6001 Executive Boulevard, Bethesda, MD 20892-MSC, United States; Husain, M.M., Department of Psychiatry, University of Texas Southwestern Medical Center, 5323 Harry Hines Boulevard, Dallas, TX 75390-9086, United States; MacLeod, L., Department of Psychiatry, University of Texas Southwestern Medical Center, 5323 Harry Hines Boulevard, Dallas, TX 75390-9086, United States; Wisniewski, S.R., Epidemiology Data Coordinating Center, University of Pittsburgh, 127 Parran Hall, 130 DeSoto Street, Pittsburgh, PA 15261, United States; Rush, A.J., Department of Psychiatry, University of Texas Southwestern Medical Center, 5323 Harry Hines Boulevard, Dallas, TX 75390-9086, United States",Major depressive disorder; Randomized clinical trial; Recruitment,"antidepressant agent; adult; aged; article; clinical practice; cognitive therapy; controlled study; health care cost; human; major clinical study; major depression; mental health service; outpatient; priority journal; research ethics; research subject; validity; Adolescent; Adult; Aged; Antidepressive Agents; Cognitive Therapy; Combined Modality Therapy; Depressive Disorder, Major; Ethics, Clinical; Female; Humans; Male; Middle Aged",Article,Scopus,,R,Scope irrelevant,Unclassified,,,,,,,N/A,,N/A,,,,,,
2-s2.0-33645134013,"Valenza II J.J., Scherer G.W.",Mechanism for salt scaling,2006,"Over the past 60 years, concrete infrastructure in cold climates has deteriorated by ""salt scaling,"" which is superficial damage that occurs during freezing in the presence of saline water. It reduces mechanical integrity and necessitates expensive repair or replacement. The phenomenon can be demonstrated by pooling a solution on a block of concrete and subjecting it to freeze/thaw cycles. The most remarkable feature of salt scaling is that the damage is absent if the pool contains pure water, it becomes serious at concentrations of a few weight percent, and then stops at concentrations above about 6 wt%. In spite of a wealth of research, the mechanism responsible for this damage has only recently been identified. In this article, we show that salt scaling is a consequence of the fracture behavior of ice. The stress arises from thermal expansion mismatch between ice and concrete, which puts the ice in tension as the temperature drops. Considering the mechanical and viscoelastic properties of ice, it is shown that this mismatch will not cause pure ice to crack, but moderately concentrated solutions are expected to crack. Cracks in the brine ice penetrate into the substrate, resulting in superficial damage. At high concentrations, the ice does not form a rigid enough structure to result in significant stress, so no damage occurs. The morphology of cracking is predicted by fracture mechanics. © 2006 The American Ceramic Society.",Journal of the American Ceramic Society,10.1111/j.1551-2916.2006.00913.x,"Princeton Institute for the Science and Technology of Materials, Department of Civil and Environmental Engineering, Princeton, NJ 08540, United States; Department of Civil and Environmental Engineering, Princeton University, United States; Princeton Institute for the Science and Technology of Materials, United States; Virginia Tech Honors Society, United States; American Ceramic Society, United States; Materials Research Society, United States; American Society of Civil Engineers, United States; Princeton Institute for the Science and Technology of Materials, Department of Civil Engineering, Princeton University, United States","Valenza II, J.J., Princeton Institute for the Science and Technology of Materials, Department of Civil and Environmental Engineering, Princeton, NJ 08540, United States, Virginia Tech Honors Society, United States, American Ceramic Society, United States, Materials Research Society, United States, American Society of Civil Engineers, United States, Princeton Institute for the Science and Technology of Materials, Department of Civil Engineering, Princeton University, United States; Scherer, G.W., Princeton Institute for the Science and Technology of Materials, Department of Civil and Environmental Engineering, Princeton, NJ 08540, United States, Department of Civil and Environmental Engineering, Princeton University, United States, Princeton Institute for the Science and Technology of Materials, United States",,Salt scaling; Superficial damage; Thaw cycles; Cooling; Ice; Mechanical properties; Morphology; Saline water; Viscoelasticity; Concretes,Article,Scopus,,R,Scope irrelevant,Unclassified,,,,,,,N/A,,N/A,,,,,,
2-s2.0-33645216178,Day M.,Journals are not doing enough to protect themselves from fraud.,2006,[No abstract available],BMJ (Clinical research ed.),,,"Day, M.",,article; publication; scientific misconduct; Periodicals; Scientific Misconduct,Article,Scopus,English,R,Article format or year,Unclassified,,,,,,,N/A,,N/A,,,,,,
2-s2.0-33645303558,Giles J.,Panel clarifies stem-cell rules. **NAB Note: Title change to Rules tighten for stem-cell studies**,2006,[No abstract available],Nature.,,,"Giles, J.",,article; Biomedical and Behavioral Research; donor; embryo research; ethics; female; Genetics and Reproduction; human; international cooperation; Legal Approach; legal aspect; practice guideline; publishing; scientific misconduct; standard; stem cell; Biomedical and Behavioral Research; Genetics and Reproduction; Legal Approach; Embryo Research; Female; Guidelines; Humans; Internationality; Publishing; Scientific Misconduct; Stem Cells; Tissue Donors,Article,Scopus,English,R,Article format or year,Unclassified,,,,,,,N/A,,N/A,,,,,,
2-s2.0-33645519788,Wohn Y.,Research misconduct. Seoul National University dismisses Hwang.,2006,[No abstract available],Science.,,,"Wohn, Y.",,"article; cloning; cytology; embryo; employment; human; Korea; scientific misconduct; standard; stem cell; university; writing; Authorship; Cloning, Organism; Embryo; Employment; Faculty; Humans; Korea; Scientific Misconduct; Stem Cells; Universities",Article,Scopus,,R,Article format or year,Unclassified,,,,,,,N/A,,N/A,,,,,,
2-s2.0-33645656313,"Kivinen O., Poikus P.",Privileges of universitas magistrorum et scolarium and their justification in charters of foundation from the 13th to the 21st centuries,2006,"Analysing foundation charters, this article explores the various purposes universities have been said to serve at different periods of time, how the distinction between universities and other educational establishments has been made, and how the actions of the academic community have been justified. The data consist of 225 charters of foundation from the year 1224 to 1999. Granted by rulers, the charters depict universities as being suited to serve widely differing purposes, such as furthering the material and spiritual prosperity of the nation and the local community, strengthening the right faith and training public servants. Charters granted universities privileges such as the status of studium generale and ius ubique docendi, a universal teaching licence. These privileges created a foundation for all later principles generally applicable to the academic world. The universities originating in academic guilds founded for the protection of scholars have always been answerable to societal demands. A certain degree of loyalty by academic people to those in power has, in turn, secured the universities and the academic community their vital integrity and freedom of opinion, publication and research. © Springer 2006.",Higher Education,10.1007/s10734-004-2534-1,"Research Unit for the Sociology of Education (RUSE), Hämeenkatu 1, FIN-20014 Turku, Finland","Kivinen, O., Research Unit for the Sociology of Education (RUSE), Hämeenkatu 1, FIN-20014 Turku, Finland; Poikus, P., Research Unit for the Sociology of Education (RUSE), Hämeenkatu 1, FIN-20014 Turku, Finland",Academic community; Academic privileges and their justification in charters of foundation; Establishment of universities; Guilds; Status and functions of universities,,Article,Scopus,,R,"Research ethics, bioethics, clinical ethics, or ethical role of universities in society",Unclassified,,,,,,,N/A,,N/A,,,,,,
2-s2.0-33645749874,"Unger K., Couzin J.",Scientific misconduct. Even retracted papers endure.,2006,[No abstract available],Science,10.1126/science.312.5770.40,,"Unger, K.; Couzin, J.",,article; bibliometrics; publication; publishing; scientific misconduct; Bibliometrics; Periodicals; Publishing; Retraction of Publication; Scientific Misconduct,Article,Scopus,English,R,Article format or year,Unclassified,,,,,,,N/A,,N/A,,,,,,
2-s2.0-33645759501,Monastersky R.,Cell divisions,2006,[No abstract available],Chronicle of Higher Education,,,"Monastersky, R.",,"article; Biomedical and Behavioral Research; cell line; cloning; cytology; embryo; embryo research; ethics; Genetics and Reproduction; human; international cooperation; Korea; oocyte donation; personnel; scientific misconduct; stem cell; Biomedical and Behavioral Research; Genetics and Reproduction; Cell Line; Cloning, Organism; Embryo; Embryo Research; Humans; International Cooperation; Korea; Oocyte Donation; Research Personnel; Scientific Misconduct; Stem Cells",Article,Scopus,English,R,Article format or year,Unclassified,,,,,,,N/A,,N/A,,,,,,
2-s2.0-33645783996,Brender A.,A nation's pride turns to shame,2006,[No abstract available],Chronicle of Higher Education,,,"Brender, A.",,"article; Biomedical and Behavioral Research; cell line; cloning; embryo research; ethics; Genetics and Reproduction; human; Korea; oocyte donation; personnel; public opinion; scientific misconduct; stem cell; Biomedical and Behavioral Research; Genetics and Reproduction; Cell Line; Cloning, Organism; Embryo Research; Humans; Korea; Oocyte Donation; Public Opinion; Research Personnel; Scientific Misconduct; Stem Cells",Article,Scopus,English,R,Article format or year,Unclassified,,,,,,,N/A,,N/A,,,,,,
2-s2.0-33645813387,Regalado A.,Stem-cell rift shows difficulty obtaining eggs.,2005,[No abstract available],Wall Street journal (Eastern ed.),,,"Regalado, A.",,"article; Biomedical and Behavioral Research; cloning; cytology; economics; embryo; embryo research; ethics; female; financial management; Genetics and Reproduction; human; Korea; methodology; oocyte donation; organization and management; Popular Approach/Source; risk; scientific misconduct; stem cell; United States; Biomedical and Behavioral Research; Genetics and Reproduction; Popular Approach/Source; Cloning, Organism; Embryo; Embryo Research; Female; Humans; Korea; Oocyte Donation; Private Sector; Research Support; Risk; Scientific Misconduct; Stem Cells; United States",Article,Scopus,English,R,Article format or year,Unclassified,,,,,,,N/A,,N/A,,,,,,
2-s2.0-33645831973,"Mathews A.W., Wonacott P.","Playing detective: at medical journal, editor finds truth hard to track down; termite-eaten data plague Dr. Smith's 12-year probe of an Indian researcher.",2005,[No abstract available],Wall Street journal (Eastern ed.),,,"Mathews, A.W.; Wonacott, P.",,"article; Biomedical and Behavioral Research; BMJ (British Medical Journal); clinical trial; ethics; forgery; human; India; personnel; Popular Approach/Source; publication; publishing; scientific misconduct; standard; Biomedical and Behavioral Research; BMJ (British Medical Journal); Popular Approach/Source; Clinical Trials; Editorial Policies; Fraud; Humans; India; Journalism, Medical; Periodicals; Research Personnel; Scientific Misconduct",Article,Scopus,English,R,Article format or year,Unclassified,,,,,,,N/A,,N/A,,,,,,
2-s2.0-33645927631,Wade N.,University panel faults cloning co-author.,2006,[No abstract available],The New York times,,,"Wade, N.",,"article; Biomedical and Behavioral Research; cloning; embryo research; ethics; Genetics and Reproduction; human; Korea; personnel; Popular Approach/Source; scientific misconduct; United States; university; University of Pittsburgh; writing; Biomedical and Behavioral Research; Genetics and Reproduction; Popular Approach/Source; University of Pittsburgh; Authorship; Cloning, Organism; Embryo Research; Humans; Korea; Research Personnel; Scientific Misconduct; United States; Universities",Article,Scopus,English,R,Article format or year,Unclassified,,,,,,,N/A,,N/A,,,,,,
2-s2.0-33645958582,"Bradley N.M.E., Chow E., Tsao M.N., Danjoux C., Barnes E.A., Hayter C., Holden L., Yau V., Li K., Doyle M., Sinclair E.",Reasons for poor accrual in palliative radiation therapy research studies,2006,"Background: Patients with advanced-stage cancer commonly have multiple symptoms, poor performance status, and limited life expectancies. Despite the need for evidence-based practice and guidelines for palliative radiation therapy (RT), conducting clinical palliative research has proven to be a challenge in the past because of low accrual rates and high patient attrition. We explore the change in accrual rates, reasons for nonparticipation in palliative RT clinical research trials, and factors that contributed to the increase in accrual over a 3-year period. Patients and Methods: A record was kept for all patients seen at the Rapid Response Radiotherapy Program between 2002 and 2005, including information on patient demographics, disease characteristics, and whether patients were accrued into ≥ 1 palliative research study at the time of clinic visit. If a patient did not participate in a study, the reason for nonaccrual was recorded. Results: Despite previous difficulties, changes to the methods of conducting palliative research and study design have resulted in an increase in patient accrual, from 14% to an average of approximately 60%. The implementation of a full-time clinical research assistant and a simple study design with realistic eligibility criteria contributed to the increase in patient participation. Conclusion: Difficulties in conducting palliative clinical research trials were improved through changes in study design and research administration. Future clinics should use a dedicated clinical research assistant responsible for patient recruitment and study management. Studies should be designed specifically for the patient population receiving palliative care and should involve clearly defined and realistic eligibility criteria and brief assessments.",Supportive Cancer Therapy,10.3816/SCT.2006.n.007,"Department of Radiation Therapy, Toronto-Sunnybrook Regional Cancer Centre, 2075 Bayview Ave, Toronto, Ont. M4N 3M5, Canada; Rapid Response Radiotherapy Program, Toronto-Sunnybrook Regional Cancer Centre, University of Toronto, Ontario, Ont., Canada","Bradley, N.M.E., Rapid Response Radiotherapy Program, Toronto-Sunnybrook Regional Cancer Centre, University of Toronto, Ontario, Ont., Canada; Chow, E., Rapid Response Radiotherapy Program, Toronto-Sunnybrook Regional Cancer Centre, University of Toronto, Ontario, Ont., Canada; Tsao, M.N., Rapid Response Radiotherapy Program, Toronto-Sunnybrook Regional Cancer Centre, University of Toronto, Ontario, Ont., Canada; Danjoux, C., Rapid Response Radiotherapy Program, Toronto-Sunnybrook Regional Cancer Centre, University of Toronto, Ontario, Ont., Canada; Barnes, E.A., Rapid Response Radiotherapy Program, Toronto-Sunnybrook Regional Cancer Centre, University of Toronto, Ontario, Ont., Canada; Hayter, C., Rapid Response Radiotherapy Program, Toronto-Sunnybrook Regional Cancer Centre, University of Toronto, Ontario, Ont., Canada; Holden, L., Rapid Response Radiotherapy Program, Toronto-Sunnybrook Regional Cancer Centre, University of Toronto, Ontario, Ont., Canada; Yau, V., Rapid Response Radiotherapy Program, Toronto-Sunnybrook Regional Cancer Centre, University of Toronto, Ontario, Ont., Canada; Li, K., Rapid Response Radiotherapy Program, Toronto-Sunnybrook Regional Cancer Centre, University of Toronto, Ontario, Ont., Canada; Doyle, M., Rapid Response Radiotherapy Program, Toronto-Sunnybrook Regional Cancer Centre, University of Toronto, Ontario, Ont., Canada; Sinclair, E., Department of Radiation Therapy, Toronto-Sunnybrook Regional Cancer Centre, 2075 Bayview Ave, Toronto, Ont. M4N 3M5, Canada, Rapid Response Radiotherapy Program, Toronto-Sunnybrook Regional Cancer Centre, University of Toronto, Ontario, Ont., Canada",Attrition; Clinical trials; Data collection; Metastatic disease; Patient participation,adult; aged; article; clinical research; controlled study; demography; female; human; major clinical study; male; medical record; methodology; palliative therapy; patient participation,Article,Scopus,,R,Scope irrelevant,Unclassified,,,,,,,N/A,,N/A,,,,,,
2-s2.0-33645964676,Cole A.,UK launches panel to tackle research misconduct.,2006,[No abstract available],BMJ (Clinical research ed.),,,"Cole, A.",,article; medical research; scientific misconduct; United Kingdom; Biomedical Research; Great Britain; Scientific Misconduct,Article,Scopus,,R,Article format or year,Unclassified,,,,,,,N/A,,N/A,,,,,,
2-s2.0-33645967209,"Sekiyama E., Nakamura T., Cooper L.J., Kawasaki S., Hamuro J., Fullwood N.J., Kinoshita S.",Unique distribution of thrombospondin-1 in human ocular surface epithelium,2006,"PURPOSE. The study was conducted to elucidate the detailed expression pattern of angiogenesis-related factors in human ocular surface epithelium. The focus was factors with significantly higher gene expression in corneal epithelium (CE) than in conjunctival epithelium (CJE). METHODS. The relative gene expression of 36 angiogenesis-related factors was compared in human CE and CJE, by using the introduced amplified fragment-length polymorphism (iAFLP) method. Also examined were the expression patterns in the CE, limbal epithelium (LE), and CJE of factors with significantly higher expression in the CE, by using real-time PCR, in situ hybridization, immunohistochemistry, and immunoelectron microscopy. RESULTS. Only thrombospondin (TSP)-1 exhibited significantly higher expression in the CE. In situ hybridization and real-time PCR showed TSP-1 transcripts in the basal cells of the CE and LE. Compared with the CJE, they were significantly upregulated at those sites. Immunohistochemistry revealed that TSP-1 was strongly expressed in the basal region of the CE. Its expression was faint in LE and absent in CJE. Immunoelectron microscopy revealed that the CE and LE demonstrated TSP-1 labeling just below the epithelium, in the basal region of basal cells, and occasionally in the basal cell membrane. There was little or no labeling in the CJE. CONCLUSIONS. In the human ocular surface epithelium, basal cells of the CE and LE, but not of the CJE, synthesize TSP-1. High levels of TSP-1 are present only just below the CE. Its unique distribution may be related to corneal avascularity and integrity. Copyright © Association for Research in Vision and Ophthalmology.",Investigative Ophthalmology and Visual Science,10.1167/iovs.05-1305,"Department of Ophthalmology, Kyoto Prefectural University of Medicine, Kyoto, Japan; Research Center for Regenerative Medicine, Doshisha University, Kyoto, Japan; Institute of Environmental and Natural Sciences, Lancaster University, Lancaster, United Kingdom; Department of Ophthalmology, Kyoto Prefectural University of Medicine, Kawaramachi Hirokoji, Kamigyo-ku, Kyoto 602-0841, Japan","Sekiyama, E., Department of Ophthalmology, Kyoto Prefectural University of Medicine, Kyoto, Japan, Department of Ophthalmology, Kyoto Prefectural University of Medicine, Kawaramachi Hirokoji, Kamigyo-ku, Kyoto 602-0841, Japan; Nakamura, T., Department of Ophthalmology, Kyoto Prefectural University of Medicine, Kyoto, Japan, Research Center for Regenerative Medicine, Doshisha University, Kyoto, Japan; Cooper, L.J., Institute of Environmental and Natural Sciences, Lancaster University, Lancaster, United Kingdom; Kawasaki, S., Department of Ophthalmology, Kyoto Prefectural University of Medicine, Kyoto, Japan; Hamuro, J., Department of Ophthalmology, Kyoto Prefectural University of Medicine, Kyoto, Japan; Fullwood, N.J., Institute of Environmental and Natural Sciences, Lancaster University, Lancaster, United Kingdom; Kinoshita, S., Department of Ophthalmology, Kyoto Prefectural University of Medicine, Kyoto, Japan",,"thrombospondin 1; angiogenic protein; primer DNA; thrombospondin 1; amplified fragment length polymorphism; article; conjunctiva epithelium; controlled study; cornea epithelium; human; human cell; human tissue; immunoelectron microscopy; immunohistochemistry; in situ hybridization; priority journal; protein expression; protein localization; real time polymerase chain reaction; chemistry; comparative study; conjunctiva; cornea epithelium; epithelium; gene amplification; gene expression regulation; genetics; metabolism; middle aged; restriction fragment length polymorphism; reverse transcription polymerase chain reaction; ultrastructure; upregulation; Angiogenic Proteins; Conjunctiva; DNA Primers; Epithelium; Epithelium, Corneal; Gene Amplification; Gene Expression Regulation; Humans; Immunohistochemistry; In Situ Hybridization; Microscopy, Immunoelectron; Middle Aged; Polymorphism, Restriction Fragment Length; Reverse Transcriptase Polymerase Chain Reaction; Thrombospondin 1; Up-Regulation",Article,Scopus,,R,Scope irrelevant,Unclassified,,,,,,,N/A,,N/A,,,,,,
2-s2.0-33646125205,"Adighibe O., Micklem K., Campo L., Ferguson M., Harris A., Pozos R., Gatter K., Pezzella F.",Is nonangiogenesis a novel pathway for cancer progression? A study using 3-dimensional tumour reconstructions,2006,The nonangiogenic lung tumour is characterized by neoplastic cells co-opting the pre-existent vasculature and filling the alveoli space. 3-Dimensional reconstruction of the tumour reveals that this particular tumour progresses without neovascularization and there is no major destruction of the lung's architectural integrity. © 2006 Cancer Research.,British Journal of Cancer,10.1038/sj.bjc.6603039,"Laboratory of Neurogenetics, National Institute on Aging, National Institute of Health, 35 Convent Drive, Bethesda, MD 20892, United States; Nuffield Department of Clinical Laboratory Science, University of Oxford, John Radcliffe Hospital, Headington OX3 9DU, Oxford, United Kingdom; Cancer Research UK Medical Oncology Unit, Churchill Hospital, Old Road, OX3 7LJ, Oxford, United Kingdom; San Diego State University, 5250 Campanile Drive, San Diego, CA 92182-1931, United States; Division of International Training and Research, Fogarty International Center, National Institutes of Health, 31 Center Drive, Bethesda, MD 20892-2220, United States","Adighibe, O., Laboratory of Neurogenetics, National Institute on Aging, National Institute of Health, 35 Convent Drive, Bethesda, MD 20892, United States, Division of International Training and Research, Fogarty International Center, National Institutes of Health, 31 Center Drive, Bethesda, MD 20892-2220, United States; Micklem, K., Nuffield Department of Clinical Laboratory Science, University of Oxford, John Radcliffe Hospital, Headington OX3 9DU, Oxford, United Kingdom; Campo, L., Nuffield Department of Clinical Laboratory Science, University of Oxford, John Radcliffe Hospital, Headington OX3 9DU, Oxford, United Kingdom; Ferguson, M., Nuffield Department of Clinical Laboratory Science, University of Oxford, John Radcliffe Hospital, Headington OX3 9DU, Oxford, United Kingdom; Harris, A., Cancer Research UK Medical Oncology Unit, Churchill Hospital, Old Road, OX3 7LJ, Oxford, United Kingdom; Pozos, R., San Diego State University, 5250 Campanile Drive, San Diego, CA 92182-1931, United States; Gatter, K., Nuffield Department of Clinical Laboratory Science, University of Oxford, John Radcliffe Hospital, Headington OX3 9DU, Oxford, United Kingdom; Pezzella, F., Nuffield Department of Clinical Laboratory Science, University of Oxford, John Radcliffe Hospital, Headington OX3 9DU, Oxford, United Kingdom",3D reconstruction; Angiogenesis; Lung cancer,"CD34 antigen; cytokeratin; angiogenesis; antigen retrieval; article; cancer growth; controlled study; fluorescence; histopathology; human; human tissue; image processing; immunocytochemistry; lung cancer; lung non small cell cancer; pericyte; priority journal; three dimensional imaging; tissue section; Antigens, CD34; Carcinoma, Non-Small-Cell Lung; Disease Progression; Humans; Imaging, Three-Dimensional; Immunohistochemistry; Keratins; Lung Neoplasms; Neovascularization, Pathologic; Staining and Labeling",Article,Scopus,,R,Scope irrelevant,Unclassified,,,,,,,N/A,,N/A,,,,,,
2-s2.0-33646249366,Levi R.,"Misconduct, mistake, or something in between? [Forskningsfusk, felsteg eller något mittemellan?]",2006,"Rare cases of outright research fraud often receive extensive media coverage. These reports tend to draw our attention from less flagrant but far more common threats to the integrity of medical science. Such threats appear throughout the entire research process jeopardizing the validity of medical research. To address these issues effectively, an open debate and a broad, multi-faceted approach are urgently needed.",Lakartidningen,,,"Levi, R.",,"article; conflict of interest; ethics; financial management; human; mass communication; medical research; peer review; research ethics; scientific misconduct; standard; statistical analysis; Biomedical Research; Conflict of Interest; Data Interpretation, Statistical; Diffusion of Innovation; Ethics, Research; Humans; Peer Review, Research; Research Support; Scientific Misconduct",Article,Scopus,Swedish,R,Accessibility and language,Unclassified,,,,,,,N/A,,N/A,,,,,,
2-s2.0-33646370979,Bernstein M.,Ethical guideposts to clinical trials in oncology,2006,Clinical research with human subjects is an ethically challenging task requiring ultimate trust on the part of patients and ultimate respect for persons on the part of clinical researchers. The author provides a simple framework to help researchers ensure the ethical integrity of a clinical trial in oncology.,Current Oncology,,"Department of Surgery, University of Toronto, Toronto Western Hospital, 4W451-399 Bathurst Street, Toronto, Ont. M5T 2S8, Canada; Division of Neurosurgery, Toronto Western Hospital, University of Toronto, Toronto, Ont., Canada","Bernstein, M., Department of Surgery, University of Toronto, Toronto Western Hospital, 4W451-399 Bathurst Street, Toronto, Ont. M5T 2S8, Canada, Division of Neurosurgery, Toronto Western Hospital, University of Toronto, Toronto, Ont., Canada",Bioethics; Clinical trials; Conflict of interest; Ethics; Informed consent,article; cancer research; clinical research; human; informed consent; patient selection; practice guideline; publication; research ethics,Article,Scopus,,R,"Research ethics, bioethics, clinical ethics, or ethical role of universities in society",Unclassified,,,,,,,N/A,,N/A,,,,,,
2-s2.0-33646454167,Ley A.,"Medicine in concentration camps: Deliberate neglect, minimal care, medical crimes a permanent exhibition at the memorial site of Sachsenhausen [Medizin im Konzentrationslager: Gezielte Vernachlässigung, medizinische Minimalversorgung, ärztliche Verbrechen Dauerausstellung in der Gedenkstätte Sachsenhausen]",2006,"In November 2004, the exhibition ""Medicine and Crime"" was opened at the Memorial Site of Sachsenhausen near Berlin. The exhibition is located in barracks R I and R II, which have persisted in their original form. These barracks were part of the camp infirmary, which was extended repeatedly up to the end of the war. Its medical facilities included laboratories, operating theatres and wards. The infirmary was the place where ""racial research"" and numerous medical experiments were carried out on inmates. SS doctors performed compulsory sterilisations and castrations. Several thousand inmates were murdered in systematically planned programmes to dispose of the sick, such as ""Operation 14f 13"". As shown in the exhibition, the infirmary was also meant for providing minimal medical care for inmates to prevent the spread of contagious diseases and epidemics. In 1942, after setbacks in the war, attention was paid to restoring sick inmates' ability to work. Overcrowding, inhuman treatment and poor supply of medicines led to largely disastrous conditions in the infirmary. It is a special aspect of this exhibition that the events in the infirmary are told from the perspective of the inmates, i. e. the victims, not the perpetrators.",Medizinhistorisches Journal,,"Kuratorin der Ausstellung Medizin und Verbrechen, Gedenkstätte und Museum Sachsenhausen, Straße der Nationen 22, D-16515 Oranienburg, Germany","Ley, A., Kuratorin der Ausstellung Medizin und Verbrechen, Gedenkstätte und Museum Sachsenhausen, Straße der Nationen 22, D-16515 Oranienburg, Germany","""Racial research""; Camp infirmary; Compulsory castration; Compulsory sterilisation; Exhibition; Human experimentation; Medical killings; National Socialism; Sachsenhausen Concentration Camp","article; classification; crime; ethnic group; Germany; health care delivery; history; human; malpractice; medical ethics; prison; publication; race; scientific misconduct; social psychology; violence; war; Concentration Camps; Continental Population Groups; Delivery of Health Care; Ethics, Medical; Ethnic Groups; Exhibits; Germany; History, 20th Century; Humans; Malpractice; Prejudice; Scientific Misconduct; Violence; War Crimes; World War II",Article,Scopus,German,R,Accessibility and language,Unclassified,,,,,,,N/A,,N/A,,,,,,
2-s2.0-33646475443,Xin H.,Scientific community. University clears Chinese biophysicist of misconduct.,2006,[No abstract available],Science.,,,"Xin, H.",,antiinfective agent; peptide; article; China; patent; protein engineering; publishing; scientific misconduct; university; writing; Anti-Bacterial Agents; Authorship; China; Patents; Peptides; Protein Engineering; Publishing; Scientific Misconduct; Universities,Article,Scopus,English,R,Article format or year,Unclassified,,,,,,,N/A,,N/A,,,,,,
2-s2.0-33646494624,"Chen X.-Q., Wang J., Cai B.-G.",Research of GPS application in train Integrity monitoring,2006,This paper is devoted to the research of a method in GPS application in train integrity monitoring. The research results of this method shown in this paper are used to validate its efficiency and accuracy through field trial tests. The alarm threshold and methods also are discussed thoroughly.,Beijing Jiaotong Daxue Xuebao/Journal of Beijing Jiaotong University,,"School of Electronics and Information Engineering, Beijing Jiaotong University, Beijing 100044, China","Chen, X.-Q., School of Electronics and Information Engineering, Beijing Jiaotong University, Beijing 100044, China; Wang, J., School of Electronics and Information Engineering, Beijing Jiaotong University, Beijing 100044, China; Cai, B.-G., School of Electronics and Information Engineering, Beijing Jiaotong University, Beijing 100044, China",Global position system(GPS); Train integrity monitoring; Train tail device,,Article,Scopus,,R,Scope irrelevant,Unclassified,,,,,,,N/A,,N/A,,,,,,
2-s2.0-33646501000,Weber J.,Implementing an organizational ethics program in an academic environment: The challenges and opportunities for the Duquesne University schools of business,2006,"This paper acknowledges the paucity of attention regarding the development of ethics programs within an academic environment and describes in a case study how the Duquesne University schools of business attempted to introduce, integrate and promote its own ethics program. The paper traces the business school's attention to mission statements, curriculum development, ethics policy, program oversight and outcome assessment. Lessons learned are offered as suggestions for others seeking to develop and implement an ethics program in their school. © Springer 2006.",Journal of Business Ethics,10.1007/s10551-005-3970-2,"Department of Business and Ethics and Management, United States; Beard Center for Leadership in Ethics, Duquesne University, United States; Beard Center for Leadership and Ethics, Duquesne University, Rockwell Hall #813, 600 Forbes Avenue, Pittsburgh, PA 15282, United States","Weber, J., Department of Business and Ethics and Management, United States, Beard Center for Leadership in Ethics, Duquesne University, United States, Beard Center for Leadership and Ethics, Duquesne University, Rockwell Hall #813, 600 Forbes Avenue, Pittsburgh, PA 15282, United States",Academic integrity; Business schools; Case study; Code of ethics; Ethics course; Ethics programs; Honor code; Program assessment,,Article,Scopus,,R,Scope irrelevant,Unclassified,,,,,,,N/A,,N/A,,,,,,
2-s2.0-33646569140,Burton T.M.,Blood-substitute study is criticized by U.S. agency.,2006,[No abstract available],Wall Street journal (Eastern ed.),,,"Burton, T.M.",,blood substitute; article; Biomedical and Behavioral Research; blood transfusion; clinical trial; control group; controlled clinical trial; drug industry; ethics; food and drug administration; human; informed consent; injury; interpersonal communication; Popular Approach/Source; public health service; randomized controlled trial; research subject; treatment withdrawal; unconsciousness; United States; Biomedical and Behavioral Research; Popular Approach/Source; Blood Substitutes; Blood Transfusion; Control Groups; Disclosure; Drug Industry; Humans; Presumed Consent; Randomized Controlled Trials; Research Subjects; Unconsciousness; United States; United States Food and Drug Administration; United States Office of Research Integrity; Withholding Treatment; Wounds and Injuries,Article,Scopus,,R,Article format or year,Unclassified,,,,,,,N/A,,N/A,,,,,,
2-s2.0-33646569983,Tesoriero H.W.,Vioxx doctors wooed by Merck are now its foes.,2006,[No abstract available],Wall Street journal (Eastern ed.),,,"Tesoriero, H.W.",,"lactone; nonsteroid antiinflammatory agent; prostaglandin synthase inhibitor; sulfone; arthritis; article; drug industry; ethics; Health Care and Public Health; heart infarction; human; Legal Approach; legal aspect; legal liability; marketing; Merck Inc.; physician; Popular Approach/Source; recumbency; scientific misconduct; United States; Health Care and Public Health; Legal Approach; Merck Inc.; Popular Approach/Source; Anti-Inflammatory Agents, Non-Steroidal; Arthritis; Cyclooxygenase Inhibitors; Deception; Drug Industry; Humans; Lactones; Liability, Legal; Marketing; Myocardial Infarction; Physicians; Scientific Misconduct; Sulfones; United States",Article,Scopus,English,R,Article format or year,Unclassified,,,,,,,N/A,,N/A,,,,,,
2-s2.0-33646822935,Stephens J.,Panel faults Pfizer in '96 clinical trial in Nigeria.,2006,[No abstract available],"Washington post (Washington, D.C. : 1974)",,,"Stephens, J.",,"new drug; quinolone derivative; article; Biomedical and Behavioral Research; child; clinical trial; developing country; drug industry; ethics; food and drug administration; forgery; human; human experiment; infant; legal aspect; meningitis; Nigeria; Pfizer Ltd.; Popular Approach/Source; recumbency; scientific misconduct; United States; Biomedical and Behavioral Research; Pfizer Ltd.; Popular Approach/Source; Child; Clinical Trials; Deception; Developing Countries; Drug Industry; Drugs, Investigational; Fluoroquinolones; Fraud; Humans; Infant; Meningitis; Nigeria; Scientific Misconduct; Therapeutic Human Experimentation; United States; United States Food and Drug Administration",Article,Scopus,English,R,Article format or year,Unclassified,,,,,,,N/A,,N/A,,,,,,
2-s2.0-33646833750,"Singer P.A., Guyatt G.H.",Deeper lessons from the CMAJ debacle,2006,[No abstract available],Lancet,10.1016/S0140-6736(06)68667-4,"University of Toronto Joint Centre for Bioethics, Toronto, Ont. M5G 1L4, Canada; Clinical Epidemiology and Biostatistics and Medicine, McMaster University, Hamilton, Ont., Canada","Singer, P.A., University of Toronto Joint Centre for Bioethics, Toronto, Ont. M5G 1L4, Canada; Guyatt, G.H., Clinical Epidemiology and Biostatistics and Medicine, McMaster University, Hamilton, Ont., Canada",,article; conflict; human relation; independence; legal aspect; priority journal; publication; publishing; scientific misconduct; Canada; employment; human; Canada; Editorial Policies; Employment; Humans; Periodicals,Article,Scopus,English,R,"Research ethics, bioethics, clinical ethics, or ethical role of universities in society",Unclassified,,,,,,,N/A,,N/A,,,,,,
2-s2.0-33646847341,Bürger J.,Fraud scandal in biological sciences: there are no cloned human embryonic stem cells [Fälschungsskandal in den Biowissenschaften: Es gibt keine geklonten menschlichen embryonalen Stammzellen.],2006,[No abstract available],Versicherungsmedizin / herausgegeben von Verband der Lebensversicherungs-Unternehmen e.V. und Verband der Privaten Krankenversicherung e.V.,,"Kompetenzzentrum Biowissenschaften, Münchener Rückversicherung.","Bürger, J., Kompetenzzentrum Biowissenschaften, Münchener Rückversicherung.",,"article; biomedicine; cloning; human; Korea; scientific misconduct; totipotent stem cell; Biological Sciences; Cloning, Organism; Humans; Korea; Scientific Misconduct; Totipotent Stem Cells",Article,Scopus,German,R,Accessibility and language,Unclassified,,,,,,,N/A,,N/A,,,,,,
2-s2.0-33646910793,Powell K.,Misconduct mayhem.,2006,[No abstract available],Nature,10.1038/nj7089-122a,,"Powell, K.",,article; ethics; legal aspect; personnel; psychological aspect; scientific misconduct; standard; whistleblowing; Research Personnel; Scientific Misconduct; Whistleblowing,Article,Scopus,English,R,Article format or year,Unclassified,,,,,,,N/A,,N/A,,,,,,
2-s2.0-33744470362,"Wohn D.Y., Normile D.",Korean cloning scandal. Prosecutors allege elaborate deception and missing funds.,2006,[No abstract available],Science,10.1126/science.312.5776.980,,"Wohn, D.Y.; Normile, D.",,"animal; article; bioethics; blastocyst; cell line; cloning; cytology; economics; forgery; human; Korea; legal aspect; scientific misconduct; stem cell; Animals; Bioethical Issues; Blastocyst; Cell Line; Cloning, Organism; Fraud; Humans; Korea; Scientific Misconduct; Stem Cells",Article,Scopus,English,R,Article format or year,Unclassified,,,,,,,N/A,,N/A,,,,,,
2-s2.0-33744526791,Brehany J.,"Health charities, unethical research and organizational integrity.",2005,"Organizations, particularly Catholic hospitals, schools and social service agencies, should re-examine their relationships to health and medical charities promoting unethical research such as human embryonic stem cell research and therapeutic cloning. Part 6 of the Ethical and Religious Directives provides a helpful framework for ethical analysis and action.",Health care ethics USA : a publication of the Center for Health Care Ethics,,"Mercy Medical Center, Sioux City, IA, USA.","Brehany, J., Mercy Medical Center, Sioux City, IA, USA.",,"article; bioethics; Biomedical and Behavioral Research; cloning; complicity; embryo research; Ethical and Religious Directives for Catholic Health Care Services; ethics; Genetics and Reproduction; human; institutional ethics; organization and management; practice guideline; private hospital; public relations; religion; Religious Approach; social welfare; stem cell; Biomedical and Behavioral Research; Ethical and Religious Directives for Catholic Health Care Services; Genetics and Reproduction; Religious Approach; Bioethical Issues; Catholicism; Charities; Cloning, Organism; Complicity; Embryo Research; Ethics, Institutional; Guidelines; Hospitals, Religious; Humans; Interinstitutional Relations; Stem Cells",Article,Scopus,,R,"Research ethics, bioethics, clinical ethics, or ethical role of universities in society",Unclassified,,,,,,,N/A,,N/A,,,,,,
2-s2.0-33744778090,"Brimble M., Stevenson-Clarke P.",Perceptions of the prevalence and seriousness of academic dishonesty in Australian universities,2005,"Academic dishonesty is a fundamental issue for the academic integrity of higher education institutions, and one that has lately been gaining Increasing media attention. This study reports on a survey of 1206 students and 190 academic staff across four major Queensland universities in relation to student academic misconduct. The aim of the survey was to determine the prevalence of academic misconduct, and to Investigate the extent to which perceptions of dishonesty are shared between students and staff, as preliminary steps toward developing effective strategies to deal with the academic dishonesty/misconduct problem. Results indicate a higher tolerance for academic misconduct by students in comparison to staff, particularly with respect to falsification of research results and plagiarism, as well as considerable underestimation by staff of the prevalence of virtually all forms of student academic misconduct. Overall, the study's findings confirm the significance of the issue of academic dishonesty within the Australian tertiary sector, indicating considerable divergence between students and staff in terms of perceptions of the seriousness and prevalence of student academic misconduct. We suggest that university administrators need to examine this issue closely in order to develop mechanisms for managing and curtailing the level of academic misconduct, since a failure to do so may lead to a further undermining of the academic integrity of the Australian tertiary sector.",Australian Educational Researcher,,"Griffith University, Australia","Brimble, M., Griffith University, Australia; Stevenson-Clarke, P., Griffith University, Australia",,,Article,Scopus,,R,Cheating (exclusively),Unclassified,,,,,,,N/A,,N/A,,,,,,
2-s2.0-33744981120,Burton B.,"Judge slams BAT's shredding policy as part of ""a fraud"".",2006,[No abstract available],BMJ (Clinical research ed.),,,"Burton, B.",,article; Australia; interpersonal communication; legal aspect; scientific misconduct; tobacco industry; Disclosure; New South Wales; Scientific Misconduct; Tobacco Industry,Article,Scopus,English,R,Article format or year,Unclassified,,,,,,,N/A,,N/A,,,,,,
2-s2.0-33744989462,"Auray-Blais C., Patenaude J.",A biobank management model applicable to biomedical research,2006,"Background: The work of Research Ethics Boards (REBs), especially when involving genetics research and biobanks, has become more challenging with the growth of biotechnology and biomedical research. Some REBs have even rejected research projects where the use of a biobank with coded samples was an integral part of the study, the greatest fear being the lack of participant protection and uncontrolled use of biological samples or related genetic data. The risks of discrimination and stigmatization are a recurrent issue. In light of the increasing interest in biomedical research and the resulting benefits to the health of participants, it is imperative that practical solutions be found to the problems associated with the management of biobanks: namely, protecting the integrity of the research participants, as well as guaranteeing the security and confidentiality of the participant's information. Methods: We aimed to devise a practical and efficient model for the management of biobanks in biomedical research where a medical archivist plays the pivotal role as a data-protection officer. The model had to reduce the burden placed on REBs responsible for the evaluation of genetics projects and, at the same time, maximize the protection of research participants. Results: The proposed model includes the following: 1) a means of protecting the information in biobanks, 2) offers ways to provide follow-up information requested about the participants, 3) protects the participant's confidentiality and 4) adequately deals with the ethical issues at stake in biobanking. Conclusion: Until a governmental governance body is established in Quebec to guarantee the protection of research participants and establish harmonized guidelines for the management of biobanks in medical research, it is definitely up to REBs to find solutions that the present lack of guidelines poses. The model presented in this article offers a practical solution on a day-to-day basis for REBs, as well as researchers by promoting an archivist to a pivotal role in the process. It assures protection of all participants who altruistically donate their samples to generate and improve knowledge for better diagnosis and medical treatment. © 2006 Auray-Blais and Patenaude; licensee BioMed Central Ltd.",BMC Medical Ethics,10.1186/1472-6939-7-4,"Department of Pediatrics, Faculty of Medicine and Health Sciences, Université de Sherbrooke, 3001, 12th Avenue North, Sherbrooke, Que. J1H 5N4, Canada; Department of Surgery, Faculty of Medicine and Health Sciences, Université de Sherbrooke, 3001, 12th Avenue North, Sherbrooke, Que. J1H 5N4, Canada","Auray-Blais, C., Department of Pediatrics, Faculty of Medicine and Health Sciences, Université de Sherbrooke, 3001, 12th Avenue North, Sherbrooke, Que. J1H 5N4, Canada; Patenaude, J., Department of Surgery, Faculty of Medicine and Health Sciences, Université de Sherbrooke, 3001, 12th Avenue North, Sherbrooke, Que. J1H 5N4, Canada",,"article; computer security; confidentiality; follow up; genetics; human; human relation; information center; information system; informed consent; medical ethics; medical information; medical research; personnel; Canada; donor; drug industry; ethics; genetic database; genetic privacy; genetics; health care facility; nonbiological model; organization and management; practice guideline; professional standard; research subject; standards; Biological Specimen Banks; Databases, Genetic; Drug Industry; Ethics Committees, Research; Genetic Privacy; Genetic Research; Guidelines as Topic; Humans; Informed Consent; Models, Organizational; Quebec; Research Subjects; Tissue Donors",Article,Scopus,,R,"Research ethics, bioethics, clinical ethics, or ethical role of universities in society",Unclassified,,,,,,,N/A,,N/A,,,,,,
2-s2.0-33744993178,Maloney D.M.,Research subject complains about how she was treated by an institutional review board (IRB).,2005,[No abstract available],Human research report,,"The Deem Corporation, P.O. Box 44069, Omaha, NE 68144, USA.","Maloney, D.M., The Deem Corporation, P.O. Box 44069, Omaha, NE 68144, USA.",,"anti human immunodeficiency virus agent; article; Biomedical and Behavioral Research; clinical trial; ethics; food and drug administration; human; interpersonal communication; organization and management; professional misconduct; professional standard; psychological aspect; public health service; research subject; United States; university; Biomedical and Behavioral Research; Anti-HIV Agents; Clinical Trials; Communication; Ethics Committees, Research; Humans; Professional Misconduct; Research Subjects; United States; United States Food and Drug Administration; United States Office of Research Integrity; Universities",Article,Scopus,,R,Accessibility and language,Unclassified,,,,,,,N/A,,N/A,,,,,,
2-s2.0-33744998913,Maloney D.M.,Institutional review boards (IRBs) and working with adverse event reports.,2005,[No abstract available],Human research report,,"The Deem Corporation, P.O. Box 44069, Omaha, NE 68144, USA.","Maloney, D.M., The Deem Corporation, P.O. Box 44069, Omaha, NE 68144, USA.",,"article; Biomedical and Behavioral Research; clinical trial; human; human experiment; Legal Approach; legal aspect; mandatory reporting; practice guideline; professional standard; public health service; United States; Biomedical and Behavioral Research; Legal Approach; Clinical Trials; Clinical Trials Data Monitoring Committees; Ethics Committees, Research; Guidelines; Human Experimentation; Humans; Mandatory Reporting; United States; United States Office of Research Integrity",Article,Scopus,,R,Accessibility and language,Unclassified,,,,,,,N/A,,N/A,,,,,,
2-s2.0-33745072173,"Higgins P.A.T., Chan K.M.A., Porder S.",Bridge over a philosophical divide,2006,"A deep philosophical divide exists between'strictly objective'scientists, who believe that engaging in civic debates undermines objectivity, and'citizen scientists', who believe scientists can - and at times should - help decision makers incorporate sound scientific knowledge. Here we suggest that the threat posed to scientific objectivity by the escalating politicisation of science provides a limited bridge between these competing philosophical views:a commitment to scientific objectivity requires a greater civic presence. © The Policy Press.",Evidence and Policy,10.1332/174426406777068920,"University of California, Hilgard Hall, Berkeley, CA, United States; Institute for Resources Environment and Sustainability, Vancouver, BC, Canada; Department of Geological and Environmental Sciences, Stanford University, Stanford, CA, United States","Higgins, P.A.T., University of California, Hilgard Hall, Berkeley, CA, United States; Chan, K.M.A., Institute for Resources Environment and Sustainability, Vancouver, BC, Canada; Porder, S., Department of Geological and Environmental Sciences, Stanford University, Stanford, CA, United States",Civic engagement; Politicisation; Science; Scientific integrity; Scientists; USA,,Article,Scopus,English,R,"Research ethics, bioethics, clinical ethics, or ethical role of universities in society",Unclassified,,,,,,,N/A,,N/A,,,,,,
2-s2.0-33745101072,"Austin Z., Collins D., Remillard A., Kelcher S., Chui S.",Influence of attitudes toward curriculum on dishonest academic behavior,2006,"Objectives. The objective of this study was to examine possible associations between students' self-reported behaviors and opinions towards academic dishonesty, and their attitudes towards curriculum, assessment, and teaching within the pharmacy program. Methods. A questionnaire was developed and distributed to undergraduate (pre-licensure) students at 4 schools of pharmacy in Canada, including students enrolled in the international pharmacy graduate program. Results. More than 80% of respondents indicated they had participated in one or more of the act of academic dishonesty described in the questionnaire. A weak to moderate correlation was found between students' attitudes towards pharmacy education and their self-reported behaviors related to academic dishonesty. Conclusions. This study confirmed previous findings suggesting widespread academic dishonesty as well as a hierarchy of values with respect to students' perceptions regarding severity and importance of academic dishonesty. Despite methodological limitations inherent in examining academic dishonesty, there is a definite need to continue to examine this important issue. While this study indicated only a moderate correlation between attitudes towards curriculum and dishonest behaviors, the problem of academic misconduct is multifactorial and will require ongoing study.",American Journal of Pharmaceutical Education,,"Leslie Dan Faculty of Pharmacy, University of Toronto, Canada; Faculty of Pharmacy, University of Manitoba, Canada; College of Pharmacy and Nutrition, University of Saskatchewan, Canada; Faculty of Pharmacy and Pharmaceutical Sciences, University of Alberta, Canada; University of Toronto, 19 Russell Street, Toronto, Ont. M5S 1A1, Canada","Austin, Z., Leslie Dan Faculty of Pharmacy, University of Toronto, Canada, University of Toronto, 19 Russell Street, Toronto, Ont. M5S 1A1, Canada; Collins, D., Faculty of Pharmacy, University of Manitoba, Canada; Remillard, A., College of Pharmacy and Nutrition, University of Saskatchewan, Canada; Kelcher, S., Faculty of Pharmacy and Pharmaceutical Sciences, University of Alberta, Canada; Chui, S., Leslie Dan Faculty of Pharmacy, University of Toronto, Canada",Academic dishonesty; Attitudes; Curriculum; Pharmacy education; Plagiarism,"article; attitude; Canada; curriculum; ethics; human; medical ethics; pharmacy student; recumbency; Attitude; Canada; Curriculum; Deception; Ethics; Ethics, Pharmacy; Humans; Students, Pharmacy",Article,Scopus,,R,Cheating (exclusively),Unclassified,,,,,,,N/A,,N/A,,,,,,
2-s2.0-33745201420,"Jocoy C., Dibiase D.",Plagiarism by Adult Learners Online: A case study in detection and remediation,2006,"Detecting and combating plagiarism from Web-based sources is a concern for administrators and instructors involved in online distance education. In this paper, we quantify copy-and-paste plagiarism among adult learners in an online geography course offered through Penn State's World Campus Geographic Information Systems (GIS) certificate program. We also evaluate the effectiveness of an ""expectation management"" strategy intended to discourage adult learners from unintentional violations. We found that while manual methods detected plagiarism in only about 3 percent of assignments, Turnitin.com revealed a 13 percent plagiarism rate among the same assignments. Our attempts to increase awareness and manage expectations decreased infractions measurably, but not significantly. In contrast, Turnitin.com substantially improved our ability to detect infractions. We conclude that raising awareness and managing expectations about plagiarism may be worthwhile, but is no substitute for systematic detection and vigilant enforcement, even among adult learners.",International Review of Research in Open and Distance Learning,,"California State University, Long Beach, United States; Pennsylvania State University, United States; Department of Geography, California State University, Long Beach, United States; John A. Dutton E-education Institute, College of Earth and Mineral Sciences, Penn State, United States","Jocoy, C., California State University, Long Beach, United States, Department of Geography, California State University, Long Beach, United States; Dibiase, D., Pennsylvania State University, United States, John A. Dutton E-education Institute, College of Earth and Mineral Sciences, Penn State, United States",Academic integrity; Adult education; Cheating; E-learning; Online; Plagiarism,,Article,Scopus,,R,Cheating (exclusively),Unclassified,,,,,,,N/A,,N/A,,,,,,
2-s2.0-33745365109,Maloney D.M.,Case study: agency says institutional review board (IRB) failed to warn subjects of significant problems.,2006,[No abstract available],Human research report.,,"The Deem Corporation, P.O. Box 44069, Omaha, NE 68144, USA.","Maloney, D.M., The Deem Corporation, P.O. Box 44069, Omaha, NE 68144, USA.",,"anti human immunodeficiency virus agent; article; Biomedical and Behavioral Research; clinical trial; duty to recontact; ethics; food and drug administration; human; informed consent; interpersonal communication; methodology; organization and management; practice guideline; professional standard; psychological aspect; public health service; research subject; United States; university; Biomedical and Behavioral Research; Anti-HIV Agents; Clinical Trials; Communication; Consent Forms; Duty to Recontact; Ethics Committees, Research; Guideline Adherence; Humans; Research Design; Research Subjects; United States; United States Food and Drug Administration; United States Office of Research Integrity; Universities",Article,Scopus,,R,Accessibility and language,Unclassified,,,,,,,N/A,,N/A,,,,,,
2-s2.0-33745381759,[No author name available],Human cloning and scientific corruption: the South Korea scandal and the future of the stem cell debate.,2006,[No abstract available],"New Atlantis (Washington, D.C.)",,,,,"article; attitude; Biomedical and Behavioral Research; cloning; embryo research; ethicist; ethics; financial management; Genetics and Reproduction; human; Korea; oocyte donation; peer review; personnel; persuasive communication; politics; psychological aspect; publishing; recumbency; scientific misconduct; stem cell; United States; Biomedical and Behavioral Research; Genetics and Reproduction; Attitude; Cloning, Organism; Coercion; Deception; Embryo Research; Ethicists; Humans; Journalism; Korea; Oocyte Donation; Peer Review, Research; Politics; Research Personnel; Research Support; Scientific Misconduct; Stem Cells; United States",Article,Scopus,English,R,Article format or year,Unclassified,,,,,,,N/A,,N/A,,,,,,
2-s2.0-33745385541,Marshall E.,Scientific misconduct. Crime scene investigation: how to handle misconduct.,2006,[No abstract available],Science,10.1126/science.312.5779.1465,,"Marshall, E.",,article; crime; international cooperation; policy; practice guideline; research; scientific misconduct; standard; Crime; Guidelines; International Cooperation; Public Policy; Research; Scientific Misconduct,Article,Scopus,English,R,Article format or year,Unclassified,,,,,,,N/A,,N/A,,,,,,
2-s2.0-33745401239,Maloney D.M.,Case study: research subject says institutional review board (IRB) would not answer her questions.,2006,[No abstract available],Human research report.,,"The Deem Corporation, P.O. Box 44069, Omaha, NE 68144, USA.","Maloney, D.M., The Deem Corporation, P.O. Box 44069, Omaha, NE 68144, USA.",,"article; Biomedical and Behavioral Research; clinical trial; ethics; human; interpersonal communication; legal aspect; methodology; neoplasm; organization and management; professional standard; psychological aspect; public health service; research subject; United States; Biomedical and Behavioral Research; Clinical Trials; Communication; Ethics Committees, Research; Humans; Neoplasms; Research Design; Research Subjects; United States; United States Office of Research Integrity",Article,Scopus,,R,Accessibility and language,Unclassified,,,,,,,N/A,,N/A,,,,,,
2-s2.0-33745586291,Scholze S.,"Setting standards for scientists: For almost ten years, COMEST has advised UNESCO on the formulation of ethical guidelines",2006,[No abstract available],EMBO Reports,10.1038/sj.embor.7400709,"Division of Ethics of Science and Technology, UNESCO, Paris, France","Scholze, S., Division of Ethics of Science and Technology, UNESCO, Paris, France",,"advisory committee; article; bioethics; biomedical technology assessment; decision making; education program; human rights; law; medical ethics; medical research; nanotechnology; practice guideline; priority journal; professional competence; professional practice; professional standard; professionalism; research ethics; responsibility; scientist; social behavior; Bioethics; Ethics, Research; Guidelines; Humans; International Cooperation; Scientific Misconduct; United Nations",Article,Scopus,English,R,"Research ethics, bioethics, clinical ethics, or ethical role of universities in society",Unclassified,,,,,,,N/A,,N/A,,,,,,
2-s2.0-33745600828,Taylor T.,Safeguarding advances in the life sciences: The International Council for the Life Sciences is committed to becoming the authoritative source for identifying and managing biological risks,2006,[No abstract available],EMBO Reports,10.1038/sj.embor.7400725,"International Council for the Life Sciences, Washington, DC, United States","Taylor, T., International Council for the Life Sciences, Washington, DC, United States",,advisory committee; article; biological warfare; biomedical technology assessment; biomedicine; biosafety; biotechnology; continuing education; decision making; disease surveillance; epidemic; government regulation; infection control; interdisciplinary communication; international cooperation; medical research; policy; practice guideline; priority journal; professional practice; professional standard; professionalism; public health; research ethics; risk assessment; risk management; risk reduction; scientific misconduct; social security; world health organization; Biological Sciences; Humans; International Cooperation; Risk Assessment; Risk Management,Article,Scopus,English,R,"Research ethics, bioethics, clinical ethics, or ethical role of universities in society",Unclassified,,,,,,,N/A,,N/A,,,,,,
2-s2.0-33745605537,"Tucker J.B., Hooper C.",Protein engineering: Security implications. The increasing ability to manipulate protein toxins for hostile purposes has prompted calls for regulation,2006,[No abstract available],EMBO Reports,10.1038/sj.embor.7400677,"Center for Nonproliferation Studies (CNS), Monterey Institute of International Studies, Monterey, CA, United States; Center for Nonproliferation Studies (CNS), Monterey, CA, United States","Tucker, J.B., Center for Nonproliferation Studies (CNS), Monterey Institute of International Studies, Monterey, CA, United States; Hooper, C., Center for Nonproliferation Studies (CNS), Monterey, CA, United States",,"anthrax toxin; bacterial toxin; botulinum toxin; cell surface protein; hybrid protein; immunotoxin; natural product; protein toxin; ricin; sarin; saxitoxin; Staphylococcus enterotoxin B; superantigen; unclassified drug; article; binding affinity; binding site; biological warfare; biosafety; cancer immunotherapy; cell killing; cutaneous T cell lymphoma; cytotoxicity; government regulation; human; international cooperation; law; lethal dose; medical research; medical technology; muscle spasm; nonhuman; priority journal; protein engineering; protein function; protein structure; protein synthesis; registration; research ethics; risk assessment; risk benefit analysis; scientific misconduct; target cell; terrorism; Drug Utilization; Humans; Protein Engineering; Research; Risk Management; Security Measures; Toxins, Biological",Article,Scopus,English,R,"Research ethics, bioethics, clinical ethics, or ethical role of universities in society",Unclassified,,,,,,,N/A,,N/A,,,,,,
2-s2.0-33745615128,"Revill J., Dando M.R.",A Hippocratic oath for life scientists: A Hippocratic-style oath in the life sciences could help to educate researchers about the dangers of dual-use research,2006,[No abstract available],EMBO Reports,10.1038/sj.embor.7400708,"Department of Peace Studies, University of Bradford, Bradford, United Kingdom; Department of Peace Studies, University of Bradford, Bradford, United Kingdom","Revill, J., Department of Peace Studies, University of Bradford, Bradford, United Kingdom; Dando, M.R., Department of Peace Studies, University of Bradford, Bradford, United Kingdom",,"botulinum toxin; interleukin 4; article; awareness; biological warfare; biomedicine; biosafety; continuing education; curriculum; decision making; good clinical practice; medical ethics; medical research; practice guideline; priority journal; professional competence; professional practice; professional standard; professionalism; research ethics; responsibility; scientific misconduct; scientist; social behavior; social security; Biological Sciences; Ethics, Research; Hippocratic Oath; Humans; Moral Obligations; Research Personnel; Security Measures",Article,Scopus,English,R,"Research ethics, bioethics, clinical ethics, or ethical role of universities in society",Unclassified,,,,,,,N/A,,N/A,,,,,,
2-s2.0-33745620460,van Aken J.,When risk outweighs benefit: Dual-use research needs a scientifically sound risk-benefit analysis and legally binding biosecurity measures,2006,[No abstract available],EMBO Reports,10.1038/sj.embor.7400726,"Hamburg Centre for Biological Arms Control, Hamburg University, Hamburg, Germany","van Aken, J., Hamburg Centre for Biological Arms Control, Hamburg University, Hamburg, Germany",,advisory committee; article; avian influenza; biological warfare; biosafety; epidemic; gene sequence; government regulation; host range; human; infection prevention; influenza; Influenza virus; international cooperation; medical literature; medical research; medical society; nonhuman; politics; priority journal; public health; publication; quality of life; research ethics; risk assessment; risk benefit analysis; scientific misconduct; Spanish influenza; terrorism; United States; viral genetics; virus genome; virus strain; virus transmission; virus virulence; Bioterrorism; Communicable Disease Control; Cost-Benefit Analysis; Health Services Needs and Demand; Humans; Research; Risk Assessment,Article,Scopus,English,R,"Research ethics, bioethics, clinical ethics, or ethical role of universities in society",Unclassified,,,,,,,N/A,,N/A,,,,,,
2-s2.0-33745623946,"Sander E., Jelemenská P., Kattmann U.",Towards a better understanding of ecology,2006,"In biology teaching, ecological subjects play an important role in dealing with nature in a responsible way. Empirical research has shown that, even after school instruction, students do not understand essential ecological concepts. The main reason is that preconceptions which influence learning are not taken into account in the construction of curricula. We combine findings from two independently-designed studies which have their main objectives in common. In both studies the focus is on students' conceptions of ecological terms and phenomena - ecosystem, and balance-and-change in nature. The studies were conducted within the framework of Educational Reconstruction, where three components of research are linked together: 'scientific clarification', 'comprehension of students' perspectives' and 'construction of instruction'. In order to capture the structure and quality of students' conceptions, qualitative methods were used. The results of both studies indicate that students tend to refer to more or less constant properties, in particular those which are visible in the everyday world. Processes are rarely their concern. Therefore the scientific conceptions of ecosystem, imbalance and the dynamics of biodiversity would be difficult for them to understand. For a better understanding, the dimensions of both space and time should be included in curricular design.",Journal of Biological Education,,"Carl Von Ossietzky University of Oldenburg, D-26111 Oldenburg, Germany; Department of Biology and Environmental Sciences, Carl Von Ossietzky University of Oldenburg, D-26111 Oldenburg, Germany","Sander, E., Carl Von Ossietzky University of Oldenburg, D-26111 Oldenburg, Germany; Jelemenská, P., Carl Von Ossietzky University of Oldenburg, D-26111 Oldenburg, Germany; Kattmann, U., Carl Von Ossietzky University of Oldenburg, D-26111 Oldenburg, Germany, Department of Biology and Environmental Sciences, Carl Von Ossietzky University of Oldenburg, D-26111 Oldenburg, Germany",Balance of nature; Conceptions; Ecology; Environmental education; Units of nature,,Article,Scopus,,R,Scope irrelevant,Unclassified,,,,,,,N/A,,N/A,,,,,,
2-s2.0-33745626796,Corneliussen F.,"Adequate regulation, a stop-gap measure, or part of a package? Debates on codes of conduct for scientists could be diverting attention away from more serious questions",2006,[No abstract available],EMBO Reports,10.1038/sj.embor.7400683,"London School of Economics, London, United Kingdom","Corneliussen, F., London School of Economics, London, United Kingdom",,recombinant DNA; article; awareness; biological warfare; biosafety; biotechnology; DNA modification; genetic engineering; government regulation; health care organization; medical ethics; medical research; molecular biology; policy; practice guideline; priority journal; professional practice; professional standard; public health; research ethics; responsibility; risk assessment; risk reduction; scientific misconduct; scientist; social security; terrorism; virulence; Biological Sciences; Biological Warfare; Bioterrorism; Codes of Ethics; Crime; Disclosure; Humans; International Cooperation; Research; Research Personnel,Article,Scopus,English,R,"Research ethics, bioethics, clinical ethics, or ethical role of universities in society",Unclassified,,,,,,,N/A,,N/A,,,,,,
2-s2.0-33745639266,"Mitrasinovic A., Robles Hernández F.C., Djurdjevic M., Sokolowski J.H.",On-line prediction of the melt hydrogen and casting porosity level in 319 aluminum alloy using thermal analysis,2006,"One of the major problems associated with aluminum castings is the porosity. Porosity is attributed to the shrinkage process and a lack of interdendritic feeding, which result in a reduction of the mechanical properties, loss of pressure tightness and poor surface integrity in castings. In this research was developed a methodology for on-line prediction of the hydrogen and porosity levels in 319 melts and castings, respectively. The main tools used for this research were thermal analysis and image analysis. Thermal analysis revealed that the nucleation temperature for the Al-Si-Cu eutectic changed in up to 12.3 °C for a range of dissolved hydrogen from 0.06 to 25 mL H2/100 g Al. The hydrogen-porosity threshold determined for the 319 alloy was ∼0.15 mL H2/100 g Al in the low pressure conditions (6 kPa). A statistical analysis demonstrated that this technology is highly accurate (R2 = 0.91) to predict the amount of hydrogen and the porosity. © 2006 Elsevier B.V. All rights reserved.",Materials Science and Engineering A,10.1016/j.msea.2006.04.084,"University of Toronto, Department of Materials Science and Engineering, Walberg Bldg., 184 College St, Toronto, Ont. M5S 3E4, Canada; Mechanical, Automotive and Materials Engineering, Essex Hall, 401 Sunset Avenue, Windsor, Ont. N9B 3P4, Canada; Transportation Technology Center Inc., TTCI Pueblo, CO 81001, United States; Institute of Metallurgy, TU Clausthal, Clausthal-Zellerfeld, Germany","Mitrasinovic, A., University of Toronto, Department of Materials Science and Engineering, Walberg Bldg., 184 College St, Toronto, Ont. M5S 3E4, Canada; Robles Hernández, F.C., Mechanical, Automotive and Materials Engineering, Essex Hall, 401 Sunset Avenue, Windsor, Ont. N9B 3P4, Canada, Transportation Technology Center Inc., TTCI Pueblo, CO 81001, United States; Djurdjevic, M., Institute of Metallurgy, TU Clausthal, Clausthal-Zellerfeld, Germany; Sokolowski, J.H., Mechanical, Automotive and Materials Engineering, Essex Hall, 401 Sunset Avenue, Windsor, Ont. N9B 3P4, Canada",Al-Si alloys; Hydrogen level; Hydrogen threshold; Image analysis; Porosity; Thermal analysis,Aluminum castings; Eutectics; Forecasting; Hydrogen; Image analysis; Nucleation; Online systems; Porosity; Statistical methods; Temperature; Thermoanalysis; Hydrogen level; Hydrogen threshold; On-line prediction; Aluminum alloys; Aluminum alloys; Aluminum castings; Eutectics; Forecasting; Hydrogen; Image analysis; Nucleation; Online systems; Porosity; Statistical methods; Temperature; Thermoanalysis,Article,Scopus,,R,Scope irrelevant,Unclassified,,,,,,,N/A,,N/A,,,,,,
2-s2.0-33745933470,"Yidong G., Xin H.",Research ethics. China's science ministry fires a barrage of measures at misconduct.,2006,[No abstract available],Science.,,,"Yidong, G.; Xin, H.",,"article; China; factual database; research; research ethics; scientific misconduct; standard; China; Databases, Factual; Ethics, Research; Research; Scientific Misconduct",Article,Scopus,English,R,Article format or year,Unclassified,,,,,,,N/A,,N/A,,,,,,
2-s2.0-33745933656,Ready T.,Plagiarize or perish?,2006,[No abstract available],Nature Medicine,10.1038/nm0506-494a,,"Ready, T.",,"article; ethics; human; peer review; personnel; public health service; publication; publishing; research ethics; scientific misconduct; United States; Ethics, Research; Humans; Peer Review, Research; Periodicals; Plagiarism; Research Personnel; Scientific Misconduct; United States; United States Office of Research Integrity",Article,Scopus,,R,Article format or year,Unclassified,,,,,,,N/A,,N/A,,,,,,
2-s2.0-33745943407,Wadman M.,Cant hide your lying eyes,2006,[No abstract available],Nature Medicine,10.1038/nm0506-494b,,"Wadman, M.",,"article; behavior; ethics; forensic medicine; human; personnel; public health service; research ethics; scientific misconduct; United States; Behavior; Ethics, Research; Humans; Lie Detection; Research Personnel; Scientific Misconduct; United States; United States Office of Research Integrity",Article,Scopus,,R,Scope irrelevant,Unclassified,,,,,,,N/A,,N/A,,,,,,
2-s2.0-33745944875,Powell K.,Your own desktop crime lab,2006,[No abstract available],Nature Medicine,10.1038/nm0506-493,,"Powell, K.",,"article; computer program; ethics; human; image processing; personnel; public health service; research ethics; scientific misconduct; United States; Ethics, Research; Humans; Image Processing, Computer-Assisted; Research Personnel; Scientific Misconduct; Software; United States; United States Office of Research Integrity",Article,Scopus,,R,Article format or year,Unclassified,,,,,,,N/A,,N/A,,,,,,
2-s2.0-33745948129,Marris E.,Catching the crooks.,2006,[No abstract available],Nature medicine.,,,"Marris, E.",,"article; ethics; financial management; government; human; personnel; publication; research ethics; scientific misconduct; university; Ethics, Research; Government Agencies; Humans; Periodicals; Research Personnel; Research Support; Scientific Misconduct; Universities",Article,Scopus,English,R,Article format or year,Unclassified,,,,,,,N/A,,N/A,,,,,,
2-s2.0-33745948324,Basu P.,Focus on fraud. Where are they now?,2006,[No abstract available],Nature medicine.,,,"Basu, P.",,"article; ethics; human; personnel; research ethics; scientific misconduct; Ethics, Research; Humans; Research Personnel; Scientific Misconduct",Article,Scopus,English,R,Article format or year,Unclassified,,,,,,,N/A,,N/A,,,,,,
2-s2.0-33745965471,Cyranoski D.,Your cheatin heart,2006,[No abstract available],Nature Medicine,10.1038/nm0506-490a,,"Cyranoski, D.",,"article; ethics; financial management; human; personnel; publishing; research ethics; scientific misconduct; Ethics, Research; Humans; Plagiarism; Research Personnel; Research Support; Scientific Misconduct",Article,Scopus,English,R,Article format or year,Unclassified,,,,,,,N/A,,N/A,,,,,,
2-s2.0-33745968483,"Xu Z., Xu X.-W., Zeng N., Li Q.-L.",Research of air inlet structure integrity assessment technology,2006,"Air inlet structure integrity assessment is the key technology of aircraft design in order to guarantee the safety of aircraft during the whole life time. Presenting the characteristics of advanced air inlet structure and loads, researching the air inlet structural layout and detail design technologies based on geometry nonlinear analysis technique, and the sonic fatigue test specimen design and sound load spectrum determination technologies are the main contents of the paper. The strategies of solutions are developed and the application example is given.",Hangkong Xuebao/Acta Aeronautica et Astronautica Sinica,,"Department of Aircraft Engineering, Nanjing University of Aeronautics and Astronautics, Nanjing 210016, China; Chengdu Aircraft Design and Research Institute, Chengdu 610041, China","Xu, Z., Department of Aircraft Engineering, Nanjing University of Aeronautics and Astronautics, Nanjing 210016, China, Chengdu Aircraft Design and Research Institute, Chengdu 610041, China; Xu, X.-W., Department of Aircraft Engineering, Nanjing University of Aeronautics and Astronautics, Nanjing 210016, China; Zeng, N., Chengdu Aircraft Design and Research Institute, Chengdu 610041, China; Li, Q.-L., Chengdu Aircraft Design and Research Institute, Chengdu 610041, China",Air inlet; Aircraft structure integrity; Geometry nonlinearity; Sonic fatigue; Structural mechanics of flight vehicle,Aircraft; Fatigue of materials; Finite element method; Geometry; Spectrum analysis; Stress analysis; Structural loads; Air inlet; Aircraft structure integrity; Geometry nonlinearity; Inlet structure; Sonic fatigue; Sound load spectrum; Structural mechanics of flight vehicle; Intake systems,Article,Scopus,,R,Scope irrelevant,Unclassified,,,,,,,N/A,,N/A,,,,,,
2-s2.0-33746116847,"Warren A.W., Guo Y.B.",Machined surface properties determined by nanoindentation: Experimental and FEA studies on the effects of surface integrity and tip geometry,2006,"An accurate characterization of subsurface properties is essential to understand machining induced surface integrity. However, little research has been conducted to investigate significant influences of surface integrity (hardness and residual stress) and tip geometry on the indentation process and the resulting load-depth curves. Nanoindentation was used to measure hardness and modulus in the subsurface of machined components by turning, grinding, and honing. The machining induced residual stresses can be estimated by matching the FEA simulated load-depth curves with the experimental ones. The simulation sensitivity analysis shows that the load-depth curves are significantly affected by residual stress and modulus, while friction, tip rounding, and yield strength have much smaller effects. The peak normal stresses occur on the top surface, while the peak shear stress is slightly under the surface. All peak strains are in the subsurface. The onset of material yielding during loading may be determined by tracing the evolution of loading/unloading loops at different indentation depths. A 3D simulation of nanoindentation with a spherical tip has shown that the indentation force induced by the spherical tip is less than 2% of the total force provided that the indentation depth is sufficiently large. © 2005 Elsevier B.V. All rights reserved.",Surface and Coatings Technology,10.1016/j.surfcoat.2005.11.139,"Department of Mechanical Engineering, The University of Alabama, Tuscaloosa, AL 35487, United States","Warren, A.W., Department of Mechanical Engineering, The University of Alabama, Tuscaloosa, AL 35487, United States; Guo, Y.B., Department of Mechanical Engineering, The University of Alabama, Tuscaloosa, AL 35487, United States",FEA; Machining; Nanoindentation; Surface property; Tip geometry,Computer simulation; Finite element method; Grinding (machining); Hardness; Honing; Indentation; Residual stresses; Shear stress; Turning; Load-depth curves; Nanoindentation; Tip geometry; Surface properties; Computer simulation; Finite element method; Grinding (machining); Hardness; Honing; Indentation; Residual stresses; Shear stress; Surface properties; Turning,Article,Scopus,,R,Scope irrelevant,Unclassified,,,,,,,N/A,,N/A,,,,,,
2-s2.0-33746217920,Watts J.H.,'The outsider within': Dilemmas of qualitative feminist research within a culture of resistance,2006,"Feminist research practice is firmly established within the academy and is concerned to develop ways of understanding reality that place women at their centre. However, researching women who do not identify with feminist aims presents feminist researchers with particular challenges in relation to appropriate method and ethical practice. This article discusses these challenges focusing on the issues of 'gatekeeper' access, informed consent and the impact that the insider researcher role has on 'truth telling'. Ideas offered are a critical reflection on qualitative research undertaken into the career experiences of women civil engineers in the UK. The extent to which the inside knowledge of the researcher gives rise to shared understandings and a 'common' language, and the ways this creates empathy across a 'political' and theoretical divide are discussed. An ethics of care model of feminist research practice that suggests that the line between empathy and exploitation is, in reality, a fine one, is considered. This article argues that researcher integrity is complex and dynamic; it functions along a continuum of practical constraint that involves mutuality, negotiation and re-negotiation of boundaries with participants. Copyright © 2006 SAGE Publications.",Qualitative Research,10.1177/1468794106065009,"Faculty of Health and Social Care, The Open University, 1-11 Hawley Crescent, Camden Town, London NW1 8NP, United Kingdom","Watts, J.H., Faculty of Health and Social Care, The Open University, 1-11 Hawley Crescent, Camden Town, London NW1 8NP, United Kingdom",Ethical research; Feminist; Qualitative method; Resistance,,Article,Scopus,,R,"Research ethics, bioethics, clinical ethics, or ethical role of universities in society",Unclassified,,,,,,,N/A,,N/A,,,,,,
2-s2.0-33746234720,Armstrong D.,"How the New England Journal missed warning signs on Vioxx: medical weekly waited years to report flaws in article that praised pain drug; Merck seen as ""punching bag"".",2006,[No abstract available],Wall Street journal (Eastern ed.),,,"Armstrong, D.",,"cyclooxygenase 2 inhibitor; lactone; rofecoxib; sulfone; article; Biomedical and Behavioral Research; cardiovascular disease; chemically induced disorder; clinical trial; drug industry; economics; ethics; human; Merck Inc.; New England Journal of Medicine; peer review; Popular Approach/Source; publication; publishing; scientific misconduct; standard; Biomedical and Behavioral Research; Merck Inc.; New England Journal of Medicine; Popular Approach/Source; Cardiovascular Diseases; Clinical Trials; Cyclooxygenase 2 Inhibitors; Drug Industry; Editorial Policies; Humans; Lactones; Peer Review, Research; Periodicals; Scientific Misconduct; Sulfones",Article,Scopus,English,R,Article format or year,Unclassified,,,,,,,N/A,,N/A,,,,,,
2-s2.0-33746234721,Mathews A.W.,"Fraud, errors taint a key study of widely used Sanofi drug; despite some faked results, FDA approves antibiotic; one doctor's cocaine use; company defends safety.",2006,[No abstract available],Wall Street journal (Eastern ed.),,,"Mathews, A.W.",,antiinfective agent; ketolide; telithromycin; article; Biomedical and Behavioral Research; chemically induced disorder; clinical trial; drug approval; drug industry; ethics; food and drug administration; forgery; human; liver failure; personnel; Popular Approach/Source; scientific misconduct; standard; United States; Biomedical and Behavioral Research; Popular Approach/Source; Anti-Bacterial Agents; Clinical Trials; Drug Approval; Drug Industry; Fraud; Humans; Ketolides; Liver Failure; Research Personnel; Scientific Misconduct; United States; United States Food and Drug Administration,Article,Scopus,English,R,Article format or year,Unclassified,,,,,,,N/A,,N/A,,,,,,
2-s2.0-33746442078,Couzin J.,"Cancer research. Fake data, but could the idea still be right?",2006,[No abstract available],Science,10.1126/science.313.5784.154,,"Couzin, J.",,antineoplastic agent; erlotinib; quinazoline derivative; aneuploidy; article; controlled clinical trial; genetic marker; genetics; heterozygosity loss; human; mouth disease; mouth tumor; pathology; risk factor; scientific misconduct; Aneuploidy; Antineoplastic Agents; Controlled Clinical Trials; Genetic Markers; Humans; Loss of Heterozygosity; Mouth Diseases; Mouth Neoplasms; Quinazolines; Risk Factors; Scientific Misconduct,Article,Scopus,English,R,Article format or year,Unclassified,,,,,,,N/A,,N/A,,,,,,
2-s2.0-33746475923,Glenn D.,Blood feud: a controversy over South American DNA samples held in North American laboratories ripples through anthropology.,2006,[No abstract available],The Chronicle of higher education.,,,"Glenn, D.",,"measles vaccine; American Indian; anthropology; article; behavioral research; Biomedical and Behavioral Research; blood sampling; Brazil; ethics; genetics; Genetics and Reproduction; human; human experiment; population genetics; scientific misconduct; United States; vaccination; Venezuela; violence; Biomedical and Behavioral Research; Genetics and Reproduction; Anthropology; Behavioral Research; Blood Specimen Collection; Brazil; Genetic Research; Genetics, Population; Humans; Indians, South American; Measles Vaccine; Nontherapeutic Human Experimentation; Scientific Misconduct; United States; Vaccination; Venezuela; Violence",Article,Scopus,English,R,"Research ethics, bioethics, clinical ethics, or ethical role of universities in society",Unclassified,,,,,,,N/A,,N/A,,,,,,
2-s2.0-33746520775,Monastersky R.,A second life for cloning,2006,[No abstract available],Chronicle of Higher Education,,,"Monastersky, R.",,"article; Biomedical and Behavioral Research; cell nucleus transplantation; cloning; cytology; embryo; embryo research; ethics; financial management; Genetics and Reproduction; human; Korea; methodology; scientific misconduct; stem cell; United States; Biomedical and Behavioral Research; Genetics and Reproduction; Cloning, Organism; Embryo; Humans; Korea; Nuclear Transfer Techniques; Research Embryo Creation; Research Support; Scientific Misconduct; Stem Cells; United States",Article,Scopus,English,R,Article format or year,Unclassified,,,,,,,N/A,,N/A,,,,,,
2-s2.0-33746524816,Kauth M.R.,Revealing assumptions explicating sexual orientation and promoting conceptual integrity,2006,"Over the last two decades, writers have urged researchers to provide conceptual definitions of sexual orientation in their work. Not only are definitions lacking but researchers have frequently cited support for their work from conceptually conflicting models of sexual orientation. The lack of conceptual integrity in much research in this area may be due to implicit, unexamined assumptions about sexual orientation. The result has been fragmented findings and weak explanatory models. This paper illustrates a variety of conceptual assumptions about sexual orientation found in published studies and suggests a strategy for explicating assumptions about sex and gender, sexual orientation, nature of being, role of biology and environment, and research methodology. The purpose of this paper is to unmask implicit social beliefs about same-sex attraction and attraction to both sexes and to promote reliable, testable models of sexual orientation. Such a practice is likely to expand and standardize the concept of sexual orientation. Although unmasking implicit assumptions will not prevent poorly conceived research from being conducted or published, routinely identifying conceptual assumptions in the literature will raise the standard for researchers and promote evaluation of theoretical models. Copyright © by The Haworth Press, Inc. All rights reserved.",Journal of Bisexuality,10.1300/J159v05n04_08,,"Kauth, M.R.",Assumptions; Attraction; Homosexuality; Methodology; Sexual orientation; Theory,,Article,Scopus,,R,Scope irrelevant,Unclassified,,,,,,,N/A,,N/A,,,,,,
2-s2.0-33746529389,Guterman L.,A silent scientist under fire,2006,[No abstract available],Chronicle of Higher Education,,,"Guterman, L.",,"article; Biomedical and Behavioral Research; cell line; cloning; embryo research; ethics; Genetics and Reproduction; human; Korea; personnel; scientific misconduct; stem cell; United States; University of Pittsburgh; whistleblowing; writing; Biomedical and Behavioral Research; Genetics and Reproduction; University of Pittsburgh; Authorship; Cell Line; Cloning, Organism; Embryo Research; Humans; Korea; Research Personnel; Scientific Misconduct; Stem Cells; United States; Whistleblowing",Article,Scopus,English,R,Article format or year,Unclassified,,,,,,,N/A,,N/A,,,,,,
2-s2.0-33746536215,Guterman L.,"Sense of injustice can lead scientists to act unethically, study finds.",2006,[No abstract available],The Chronicle of higher education.,,,"Guterman, L.",,"article; Biomedical and Behavioral Research; Empirical Approach; ethics; human; medical research; mental stress; motivation; personnel; psychological aspect; scientific misconduct; social justice; Biomedical and Behavioral Research; Empirical Approach; Biomedical Research; Humans; Motivation; Research Personnel; Scientific Misconduct; Social Justice; Stress, Psychological",Article,Scopus,English,R,Article format or year,Unclassified,,,,,,,N/A,,N/A,,,,,,
2-s2.0-33746550431,Guterman L.,The taint of 'misbehavior',2006,[No abstract available],Chronicle of Higher Education,,,"Guterman, L.",,"article; Biomedical and Behavioral Research; cloning; embryo research; ethics; human; Korea; peer review; personnel; scientific misconduct; stem cell; United States; university; University of Pittsburgh; writing; Biomedical and Behavioral Research; University of Pittsburgh; Authorship; Cloning, Organism; Embryo Research; Humans; Korea; Peer Review, Research; Pennsylvania; Research Personnel; Scientific Misconduct; Stem Cells; Universities",Article,Scopus,English,R,Article format or year,Unclassified,,,,,,,N/A,,N/A,,,,,,
2-s2.0-33746760275,Greenough 3rd. W.B.,Update on Dr. Thomas Butler.,2006,[No abstract available],Clinical infectious diseases : an official publication of the Infectious Diseases Society of America.,,"Johns Hopkins University, Baltimore, MD 21224, USA.","Greenough 3rd., W.B., Johns Hopkins University, Baltimore, MD 21224, USA.",,article; biological warfare; crime; human; plague; scientific misconduct; Yersinia pestis; Bioterrorism; Crime; Humans; Plague; Scientific Misconduct; Yersinia pestis,Article,Scopus,English,R,"Research ethics, bioethics, clinical ethics, or ethical role of universities in society",Unclassified,,,,,,,N/A,,N/A,,,,,,
2-s2.0-33746881089,"Weber L.J., Bissell M.G.",Should a medical license be revoked because of research fraud?,2006,[No abstract available],Clinical Leadership and Management Review,,"Department of Pathology, Ohio State University, Columbus, OH, United States","Weber, L.J.; Bissell, M.G., Department of Pathology, Ohio State University, Columbus, OH, United States",,"article; decision making; ethics; human; licensing; male; psychological aspect; punishment; scientific misconduct; Decision Making; Humans; Licensure, Medical; Male; Punishment; Scientific Misconduct",Article,Scopus,English,R,Accessibility and language,Unclassified,,,,,,,N/A,,N/A,,,,,,
2-s2.0-33746907866,"Forth S.C., Newman Jr. J.C., Forman R.G.",Anomalous fatigue crack growth data generated using the ASTM standards,2006,"The ASTM standard for fatigue crack growth, E 647, was co-developed by industry and government in the late 1970s to define a standard procedure for generating material crack growth behavior under a variety of loading conditions. The standard specifies tolerances on laboratory procedures, specimen configurations to generate material characterization information of a high integrity. Recent research developing fatigue crack growth rate data has uncovered significant issues with the standard test method and specimen configurations. The data generated has been largely dependent on specimen configuration, i.e., M(T) and C(T) specimens produce very different crack growth rate curves; C(T) specimens of different sizes do not generate the same material response; and finally, the development of steady-state, as defined using constant ΔK testing, does not agree with the data generated with the standard ASTM test method. Therefore, in this paper the authors present data that does not lend confidence in the integrity of the standard C(T) specimen tested using the ASTM standard method and investigate causes for the observed anomalous crack growth rate behavior. Copyright © 2006 by ASTM International.",Journal of ASTM International,,"NASA Langley Research Center, MS 188E, 2 West Reid St., Hampton, VA 23681, United States; Department of Aerospace Engineering, Mississippi State University, 330 Walker Engineering Lab., Hardy Street, Mississippi State, MS 39762, United States; NASA Johnson Space Center, Mail Code EM2, 2101 NASA Road 1, Houston, TX 77058, United States","Forth, S.C., NASA Langley Research Center, MS 188E, 2 West Reid St., Hampton, VA 23681, United States; Newman Jr., J.C., Department of Aerospace Engineering, Mississippi State University, 330 Walker Engineering Lab., Hardy Street, Mississippi State, MS 39762, United States; Forman, R.G., NASA Johnson Space Center, Mail Code EM2, 2101 NASA Road 1, Houston, TX 77058, United States",ASTM E 647; Crack closure; Crack growth; Fatigue crack growth,ASTM E 647; Crack closure; Crack growth rate; Fatigue crack growth; Cracks; Materials science; Standards; Crack propagation,Article,Scopus,,R,Scope irrelevant,Unclassified,,,,,,,N/A,,N/A,,,,,,
2-s2.0-33746920544,"Griffin J.M., Struve J.K., Collins D., Liu A., Nelson D.B., Bloomfield H.E.",Long term clinical trials: How much information do participants retain from the informed consent process?,2006,"Previous studies report mixed results about how much information study participants actually can read, understand and retain after completing the informed consent process; fewer studies have examined disparities in the retention and recall of information by patient factors, such as age, education, and race. Not retaining or being able to recall information from the informed consent process has potentially important ethical and legal implications and consequences for research quality and integrity, especially when found in populations that commonly are underserved or underrepresented in clinical trials. To determine how much basic knowledge participants finishing a five-year, multi-center, double-blinded randomized, placebo-controlled clinical trial had about the study, participants (n = 1789) were asked at their final follow-up visit three multiple-choice questions: (1) the study's purpose; (2) the name of the medication under investigation; (3) the main side effect of the medication. The associations between knowledge of these fundamental details and participant social and demographic factors were investigated. A majority of participants correctly recalled the study's purpose (64.7%) and medication (79.6%), but few correctly reported the main side effect (31.1%). In spite of relatively high recall for study purpose and medication, disparities by age, education and race exist. Increasing age was significantly associated with higher odds of incorrectly recalling both the study purpose and the name of the study medication. Likewise those with less than a high school education were more likely to incorrectly identify the study's purpose and the name of the study medication. Black and other non-white race or ethnic groups were more than two and a half times as likely to incorrectly identify the study's purpose. These findings suggest that even the most basic information may not be understood or retained by important subgroups of patients enrolled in clinical trials. Implementing effective strategies, such as additional time and effort for consent or repetition of study information, may be necessary in order to assure ethical and valid consent. © 2006 Elsevier Inc. All rights reserved.",Contemporary Clinical Trials,10.1016/j.cct.2006.04.006,"Center for Chronic Disease Outcomes Research, Minneapolis VA Medical Center, Minneapolis, MN, United States; University of Minnesota, School of Medicine, Minneapolis, MN, United States; Bloomington Lake Clinic, Bloomington, MN, United States; VA Cooperative Studies Program, West Haven, CT, United States","Griffin, J.M., Center for Chronic Disease Outcomes Research, Minneapolis VA Medical Center, Minneapolis, MN, United States, University of Minnesota, School of Medicine, Minneapolis, MN, United States; Struve, J.K., Bloomington Lake Clinic, Bloomington, MN, United States; Collins, D., VA Cooperative Studies Program, West Haven, CT, United States; Liu, A., Center for Chronic Disease Outcomes Research, Minneapolis VA Medical Center, Minneapolis, MN, United States; Nelson, D.B., Center for Chronic Disease Outcomes Research, Minneapolis VA Medical Center, Minneapolis, MN, United States, University of Minnesota, School of Medicine, Minneapolis, MN, United States; Bloomfield, H.E., Center for Chronic Disease Outcomes Research, Minneapolis VA Medical Center, Minneapolis, MN, United States, University of Minnesota, School of Medicine, Minneapolis, MN, United States",Clinical trials; Disparities; Informed consent; Recall of information; Retention of information,"gemfibrozil; adult; aged; article; clinical research; controlled study; demography; follow up; gallstone; heart disease; high school; human; informed consent; learning; long term care; major clinical study; male; medical information; multiple choice test; participant observation; patient assessment; patient education; race difference; recall; social aspect; statistical analysis; Age Factors; Aged; Antilipemic Agents; Cholesterol, HDL; Clinical Trials; Clinical Trials as Topic; Continental Population Groups; Educational Status; Gemfibrozil; Humans; Hypolipidemic Agents; Informed Consent; Logistic Models; Male; Marital Status; Memory; Randomized Controlled Trials; Randomized Controlled Trials as Topic",Article,Scopus,,R,"Research ethics, bioethics, clinical ethics, or ethical role of universities in society",Unclassified,,,,,,,N/A,,N/A,,,,,,
2-s2.0-33747115110,García Jordá E.,The truths of science.,2006,[No abstract available],Clinical & translational oncology : official publication of the Federation of Spanish Oncology Societies and of the National Cancer Institute of Mexico,10.1007/s12094-006-0002-3,,"García Jordá, E.",,article; ethics; medical research; scientific misconduct; standard; Biomedical Research; Scientific Misconduct,Article,Scopus,English,R,Article format or year,Unclassified,,,,,,,N/A,,N/A,,,,,,
2-s2.0-33747472593,Vucković-Dekić L.,Fraud in biomedical literature,2006,"The basic ethical principles in science are internationally recognised in all disciplines of science. The first among these is honesty--both towards oneself and towards others. The betrayal of this principle can be seen as deviant behaviour, which may result in the most serious violation of the high ethical standards of science--scientific fraud. Fraudulent behaviour in biomedical sciences is particularly damaging, since all diagnostic and treatment decisions are based on what is published in medical literature. The betrayers of science undermine, to a great extent, the public trust in science, and may destroy the confidence scientists have in each other as well, which is a grave danger to science itself. In this article, several high profile cases of scientific fraud--involving falsification, fabrication of data, and plagiarism--are described. The damaging effect they had on both science and the scientific community led to the codification of the concept of Good Scientific Practice (GSP)--an international quality standard for designing, conducting, recording, and reporting research. The concept of GSP sets internationally valid benchmarks for quality assurance, and also provides safeguards against scientific dishonesty and fraud.",Srpski arhiv za celokupno lekarstvo.,,,"Vucković-Dekić, L.",,"article; human; medical research; publishing; research ethics; scientific misconduct; Biomedical Research; Ethics, Research; Humans; Publishing; Scientific Misconduct",Article,Scopus,Croatian,R,Accessibility and language,Unclassified,,,,,,,N/A,,N/A,,,,,,
2-s2.0-33747491167,Maloney D.M.,How institutional review boards (IRBs) can handle adverse event reports.,2006,[No abstract available],Human research report.,,"The Deem Corporation, P.O. Box 44069, Omaha, NE 68144, USA.","Maloney, D.M., The Deem Corporation, P.O. Box 44069, Omaha, NE 68144, USA.",,"article; Biomedical and Behavioral Research; clinical trial; government regulation; human; Legal Approach; legal aspect; mandatory reporting; organization and management; practice guideline; professional standard; public health service; United States; Biomedical and Behavioral Research; Legal Approach; Clinical Trials; Ethics Committees, Research; Government Regulation; Guidelines; Humans; Mandatory Reporting; United States; United States Office of Research Integrity",Article,Scopus,,R,Accessibility and language,Unclassified,,,,,,,N/A,,N/A,,,,,,
2-s2.0-33747501402,Urbina I.,Panel suggests using inmates in drug trials.,2006,[No abstract available],The New York times.,,,"Urbina, I.",,"drug; advisory committee; article; Biomedical and Behavioral Research; clinical trial; ethics; government regulation; history; human; human experiment; legal aspect; motivation; persuasive communication; Popular Approach/Source; prisoner; risk assessment; scientific misconduct; United States; Biomedical and Behavioral Research; Popular Approach/Source; Advisory Committees; Clinical Trials; Coercion; Government Regulation; History, 20th Century; Humans; Motivation; Nontherapeutic Human Experimentation; Pharmaceutical Preparations; Prisoners; Risk Assessment; Scientific Misconduct; United States",Article,Scopus,English,R,"Research ethics, bioethics, clinical ethics, or ethical role of universities in society",Unclassified,,,,,,,N/A,,N/A,,,,,,
2-s2.0-33747514906,Weiss R.,"""Serious misconduct"" by NIH expert found: scientist did not report sending tissues to drug firm and getting paid, report says.",2006,[No abstract available],"Washington post (Washington, D.C. : 1974)",,,"Weiss, R.",,article; Biomedical and Behavioral Research; conflict of interest; consultation; drug industry; economics; ethics; health care organization; human; interpersonal communication; laboratory diagnosis; mental health service; personnel; Pfizer Ltd.; Popular Approach/Source; practice guideline; scientific misconduct; transplantation; United States; Biomedical and Behavioral Research; Pfizer Ltd.; Popular Approach/Source; Conflict of Interest; Consultants; Disclosure; Drug Industry; Guideline Adherence; Humans; National Institute of Mental Health (U.S.); National Institutes of Health (U.S.); Research Personnel; Scientific Misconduct; Specimen Handling; Tissue and Organ Procurement; United States,Article,Scopus,English,R,Article format or year,Unclassified,,,,,,,N/A,,N/A,,,,,,
2-s2.0-33747626708,Maloney D.M.,Case study: institutional review board (IRB) did not know about subject problem until after study.,2006,[No abstract available],Human research report.,,"The Deem Corporation, P.O. Box 44069, Omaha, NE 68144.","Maloney, D.M., The Deem Corporation, P.O. Box 44069, Omaha, NE 68144.",,"drug derivative; guanine; peldesine; article; Biomedical and Behavioral Research; clinical trial; female; human; informed consent; legal aspect; mandatory reporting; methodology; neoplasm; Office for Protection from Research Risks; organization and management; personnel; practice guideline; professional standard; psychological aspect; public health service; research subject; United States; university; Biomedical and Behavioral Research; Office for Protection from Research Risks; Clinical Trials; Consent Forms; Ethics Committees, Research; Female; Guanine; Guideline Adherence; Humans; Mandatory Reporting; Neoplasms; Research Design; Research Personnel; Research Subjects; United States; United States Office of Research Integrity; Universities",Article,Scopus,,R,Accessibility and language,Unclassified,,,,,,,N/A,,N/A,,,,,,
2-s2.0-33748636035,Werkö L.,Utredning av forskningsfusk: Myndigheternas ansvar,2006,[No abstract available],Lakartidningen,,,"Werkö, L.",,article; human; legal aspect; Norway; research; research subject; scientific misconduct; Sweden; United Kingdom; Great Britain; Humans; Norway; Research; Research Subjects; Scientific Misconduct; Sweden,Article,Scopus,Swedish,R,Accessibility and language,Unclassified,,,,,,,N/A,,N/A,,,,,,
2-s2.0-33748941287,Leighton J.A.,Recent advances in endoscopic capsule imaging: See what we have been missing,2006,"Depiction of the small intestine has always been a challenge because of its length and tortuosity. The development of capsule endoscopy has been a significant advance that has allowed for more complete small intestine evaluations. The capsule is disposable, captures 2 images per second, and has a battery life of approximately 8 hours. Images are transmitted to a data recorder via digital radio frequency communication, and downloaded to the workstation computer, where it can be read by a gastroenterologist. One of the complications of use is capsule retention; however, a patency capsule has been developed that indicates whether obstruction is present before capsule endoscopy is performed. Capsule endoscopy has renewed interest in the diagnosis and evaluation of small intestinal diseases, been partly responsible for increased research in this area, and led to the development of newer radiologic and endoscopic techniques to evaluate the small intestine. © 2006 MedReviews, LLC.",Reviews in Gastroenterological Disorders,,"Division of Gastroenterology and Hepatology, Department of Medicine, Mayo Clinic, Scottsdale, AZ, United States","Leighton, J.A., Division of Gastroenterology and Hepatology, Department of Medicine, Mayo Clinic, Scottsdale, AZ, United States",Capsule endoscopy; Gastrointestinal endoscopy; Small intestine,"article; capsule endoscopy; clinical trial; computer program; Crohn disease; diagnostic procedure; enteritis; esophagus disease; gastrointestinal hemorrhage; gastrointestinal radiography; human; image analysis; meta analysis; nuclear magnetic resonance imaging; radiofrequency; sensitivity and specificity; small intestine disease; systematic review; videorecorder; Capsules; Celiac Disease; Endoscopes, Gastrointestinal; Endoscopy, Gastrointestinal; Esophageal Diseases; Gastrointestinal Hemorrhage; Humans; Imaging, Three-Dimensional; Intestine, Small; Photography",Article,Scopus,,R,Scope irrelevant,Unclassified,,,,,,,N/A,,N/A,,,,,,
2-s2.0-33749026920,"Olivier C., von Solms R., Cowley L.",Information integrity assurance for networks: let's learn from the financial model,2006,"A study has compared the methodologies behind financial integrity and network information integrity. Researchers from South African Universities showed shortcomings in information integrity and made recommendations to address them. The authors believe that some of the ""extreme measures"" used to ensure the integrity of financial matters should be applied to information security. According to the research, only 1/9 of processes to achieve integrity assurance are fully implemented. Three quarters are implemented in an ad-hoc manner or normally implemented, while 1/9 are never put in place. It was found that security reports are ""never"" distributed to business units and CEOs don't sign-off reports. The study also discovered that transactions were recorded and stored in an ad-hoc manner. In response to the identified shortcomings, authors recommend all network activities should be captured and stored, while CEOs should sign-off high-level IT security reports. This paper draws an analogy between the models that provide financial integrity and network information integrity. A comparative study between the financial integrity assurance model and the information integrity assurance model was conducted to identify possible information integrity assurance shortcomings or 'missing links'. Recommendations are made towards improving the generic information integrity assurance scenario to address the identified shortcomings. © 2006 Elsevier Ltd. All rights reserved.",Computer Fraud and Security,10.1016/S1361-3723(06)70409-2,"Centre for Information Security Studies, Nelson Mandela Metropolitan University, Port Elizabeth, South Africa","Olivier, C., Centre for Information Security Studies, Nelson Mandela Metropolitan University, Port Elizabeth, South Africa; von Solms, R., Centre for Information Security Studies, Nelson Mandela Metropolitan University, Port Elizabeth, South Africa; Cowley, L., Centre for Information Security Studies, Nelson Mandela Metropolitan University, Port Elizabeth, South Africa",,Information analysis; Information dissemination; Mathematical models; Quality assurance; Financial integrity; Financial model; Information integrity; Security of data,Article,Scopus,,R,Scope irrelevant,Unclassified,,,,,,,N/A,,N/A,,,,,,
2-s2.0-33749181558,"Bender K.K., Siller T.J.",How an engineering college uses a university's quality enhancement system to generate and manage evidence for multiple accreditation and accountability bodies,2006,"Colleges and universities interact with multiple constituents or quality monitoring groups that require programme-level assessment of student learning. These required assessments might be used to demonstrate accountability, programme improvement or a combination of both. These demands often challenge instructional faculty to choose between the competing interests of research in their discipline and research on student learning for assessment purposes. This article offers one approach for engineering departments that simultaneously makes student learning research more meaningful for instructional faculty while farming out to the central administration those jobs it does not have the time or resources to do effectively. An engineering programme is better able to ensure the ownership, development and integrity of and research into its own curriculum if it has a centralized university improvement system that presents unit-level quality management research to external market and accountability groups.",Quality in Higher Education,10.1080/13538320600916791,"Colorado State University, Fort Collins, CO, United States","Bender, K.K., Colorado State University, Fort Collins, CO, United States; Siller, T.J., Colorado State University, Fort Collins, CO, United States",Accreditation; Assessment; Engineering; Outcomes; Quality management systems,,Article,Scopus,,R,"Research ethics, bioethics, clinical ethics, or ethical role of universities in society",Unclassified,,,,,,,N/A,,N/A,,,,,,
2-s2.0-33749356759,Scanlan C.L.,Strategies to promote a climate of academic integrity and minimize student cheating and plagiarism,2006,"Student academic misconduct is a growing problem for colleges and universities, including those responsible for preparing health professionals. Although the implementation of honor codes has had a positive impact on this problem, further reduction in student cheating and plagiarism can be achieved only via a comprehensive strategy that promotes an institutional culture of academic integrity. Such a strategy must combine efforts both to deter and detect academic misconduct, along with fair but rigorous application of sanctions against such behaviors. Methods useful in preventing or deterring dishonest behaviors among students include early integrity training complemented with course-level reinforcement, faculty role-modeling, and the application of selected testing/assignment preventive strategies, including honor pledges and honesty declarations. Giving students more responsibility for oversight of academic integrity also may help address this problem and better promote the culture needed to uphold its principles. Successful enforcement requires that academic administration provide strong and visible support for upholding academic integrity standards, including the provision of a clear and fair process and the consistent application of appropriate sanctions against those whose conduct is found to violate these standards.",Journal of Allied Health,,"Department of Interdisciplinary Studies, School of Health Related Professions, University of Medicine and Dentistry of New Jersey, Newark, NJ, United States; Department of Interdisciplinary Studies, School of Health Related Professions, University of Medicine and Dentistry of New Jersey, 65 Bergen Street, Newark, NJ 07107, United States","Scanlan, C.L., Department of Interdisciplinary Studies, School of Health Related Professions, University of Medicine and Dentistry of New Jersey, Newark, NJ, United States, Department of Interdisciplinary Studies, School of Health Related Professions, University of Medicine and Dentistry of New Jersey, 65 Bergen Street, Newark, NJ 07107, United States",,"article; deception; education; ethics; human; methodology; occupation; publishing; recumbency; social control; United States; vocational education; Allied Health Occupations; Deception; Education, Professional; Humans; Plagiarism; Social Control, Formal; Social Control, Informal; United States",Article,Scopus,,R,Cheating (exclusively),Unclassified,,,,,,,N/A,,N/A,,,,,,
2-s2.0-33749505226,Hoffmann I.,"Ernst L. Wynder, the entrepreneurial epidemiologist",2006,This article provides recollections and commentary regarding the lifelong achievements of the Founding Editor of Preventive Medicine. © 2006 Elsevier Inc. All rights reserved.,Preventive Medicine,10.1016/j.ypmed.2006.08.006,"Larchmont, NY 10528, United States","Hoffmann, I., Larchmont, NY 10528, United States",American Health Foundation; Epidemiology; Industry relations; Interdisciplinary studies; Less harmful cigarette; Passive smoking; Prevention; Public health; Scientific integrity,"achievement; article; literature; priority journal; Entrepreneurship; Epidemiology; Foundations; History, 20th Century; Humans; Periodicals; Periodicals as Topic; Preventive Medicine; Public Health; Smoking; Tobacco Industry",Article,Scopus,English,R,Scope irrelevant,Unclassified,,,,,,,N/A,,N/A,,,,,,
2-s2.0-33749989399,"Neeka J.B., Amadi S.A., Ukpaka C.U.",Assessment of corrosion-induced damage on gas pipelines in the Niger Delta,2006,"GAS PIPELINES, the arteries of the oil and chemical industries, need regular maintenance. In this research, an assessment of the integrity of gas pipelines of a nitrogenous fertilizer plant in the Niger Delta has been carried out. The peculiar nature of the Niger Delta terrain, the type of pipeline protective device (PPD) in place, the rate of corrosion damage, and its impact on the environment were examined. Metallographic survey methods predicated on ultrasonic thickness measurement, coupon weight loss, pipe-to-soil potential test, and coating economics with regard to the mechanical properties of pipes were used. It was noted that high corrosion damage occurred on both the 18-in and 10-in gas line for which good combination of cathodic protection(CP) and fusion-bonded epoxy coatings give reliable, durable, and quality design for effective control.",Global Pipeline Monthly,,"Department of Chemical /Petrochemical Engineering, Rivers State University of Science and Technology, Port Harcourt, Nigeria","Neeka, J.B., Department of Chemical /Petrochemical Engineering, Rivers State University of Science and Technology, Port Harcourt, Nigeria; Amadi, S.A., Department of Chemical /Petrochemical Engineering, Rivers State University of Science and Technology, Port Harcourt, Nigeria; Ukpaka, C.U., Department of Chemical /Petrochemical Engineering, Rivers State University of Science and Technology, Port Harcourt, Nigeria",,Corrosion damage; Pipeline protective device (PPD); Ultrasonic thickness; Weight loss; Cathodic protection; Chemical industry; Coatings; Environmental chambers; Measurement theory; Gas pipelines,Article,Scopus,,R,Scope irrelevant,Unclassified,,,,,,,N/A,,N/A,,,,,,
2-s2.0-33750054403,"Victora C.G., Moreira C.B.",North-South relations in scientific publications: Editorial racism? [Publicações científicas e as relações Norte-Sul: Racismo editorial?],2006,"The aim of the present study was to comment on the possible existence of editorial prejudice among the editors of scientificjournals form Northern countries against Southern authors. We highlight that a study using bibliometnc methods documented an important imbalance in terms of the international scientific production of health researchers from high-income countries (the ""North"") and those from low and middle-income countries (the ""South""). In a survey of Brazilian researchers, three in every four blamed this imbalance, at least in part, on prejudice among international editors. This is supported by the fact that a very small percentage of editorial board members of international journals come from the South. Although prejudice can explain part of the imbalance, there are also specific measures that may increase the likelihood of a paper from the South being accepted in international journals. These include the need to invest in the quality of the written text, and to show empathy with editors and readers, emphasizing the contribution of the manuscript to the international literature. Finally, we discuss whether research carried out in the South should be published in national or international journals, and suggest that there are at least six dimensions to this choice. These include language and target audience; type of contribution to knowledge; generalizability; citation index; speed of publication; and open access. The rapid growth in the number of Branlian contributions to the international health literature shows that editorial prejudice, although often present; can be effectively offset by research with solid methodology and good-quality presentation.",Revista de Saude Publica,,"Programa de Pós-Graduação em Epidemiologia, Universidade Federal de Pelotas, Av. Duque de Caxias, 250 3o piso, 96001-970 Pelotas, RS, Brazil","Victora, C.G., Programa de Pós-Graduação em Epidemiologia, Universidade Federal de Pelotas, Av. Duque de Caxias, 250 3o piso, 96001-970 Pelotas, RS, Brazil; Moreira, C.B., Programa de Pós-Graduação em Epidemiologia, Universidade Federal de Pelotas, Av. Duque de Caxias, 250 3o piso, 96001-970 Pelotas, RS, Brazil",Editorial policies; Epidemiology; Public health; Publication bias,"access to information; article; bibliometrics; Brazil; citation analysis; empathy; geographic distribution; health services research; income; international relations; language; methodology; professional delegation; publication; quality control; racism; scientific literature; scientific misconduct; social psychology; socioeconomics; Bibliometrics; Biomedical Research; Brazil; Databases, Bibliographic; Developed Countries; Developing Countries; Editorial Policies; Humans; Internationality; Peer Review, Research; Periodicals; Periodicals as Topic; Prejudice",Article,Scopus,Portuguese,R,Accessibility and language,Unclassified,,,,,,,N/A,,N/A,,,,,,
2-s2.0-33750202021,Joint N.,Risk assessment and copyright in digital libraries,2006,"Purpose To offer clear insights into methods for assessing the risk of mounting digital objects in a networked electronic library environment. Design/methodology/approach A brief, selective summary of work to date on relevant present day digital library investigations into this area. Findings It is possible to estimate the degree of risk involved in offering digital library services, in such a way as to manage this risk in a practical and responsible manner. Research limitations/implications Further experience of digital rights issues will better inform discussion of these matters as digital library services grow and mature in the near future; immediate examples of digital library practice in this regard are minimal and remain uncertain in their interpretation as yet. Practical implications The principles outlined may offer practitioners some useful insights into how to manage copyright aspects of their digital library collections on a day to day practical level. Originality/value This paper attempts to offer some clear principles to help practitioners grasp an area that has appeared new and intimidatingly uncertain to date. © 2006, Emerald Group Publishing Limited",Library Review,10.1108/00242530610706743,,"Joint, N.",Copyright law; Digital libraries; Risk assessment,,Article,Scopus,,R,Scope irrelevant,Unclassified,,,,,,,N/A,,N/A,,,,,,
2-s2.0-33750720639,Marshall E.,Science and business. DeCODE adds plagiarism allegation to its case.,2006,[No abstract available],Science,,,"Marshall, E.",,"article; financial management; genetics; health care organization; hospital; human; Iceland; medical genetics; public health service; publishing; United States; Genetic Research; Genetics, Medical; Hospitals, Pediatric; Humans; Iceland; National Institutes of Health (U.S.); Plagiarism; Research Support; United States; United States Office of Research Integrity",Article,Scopus,,R,Article format or year,Unclassified,,,,,,,N/A,,N/A,,,,,,
2-s2.0-33750920137,"Chen H., Qi H., Song X.-F., Tan H.",The structural model of affecting factors of management misconduct in coalmine fatal accidents in China,2006,"The authors conducted a quantitative research to the management misconduct behaviors of coalmine fatal accidents in China, constructed a structural model of affecting factors of management misconduct via using duty consciousness and technical ability as mediating variables. It clearly indicates that factor groups such as biographic characteristics, organizational commitment, organization characteristics, self efficiency and production conditions affect characteristic management misconduct behaviors and it points out the specific affecting approaches and paths.",Meitan Xuebao/Journal of the China Coal Society,,"School of Management, China University of Mining and Technology, Xuzhou 221008, China","Chen, H., School of Management, China University of Mining and Technology, Xuzhou 221008, China; Qi, H., School of Management, China University of Mining and Technology, Xuzhou 221008, China; Song, X.-F., School of Management, China University of Mining and Technology, Xuzhou 221008, China; Tan, H., School of Management, China University of Mining and Technology, Xuzhou 221008, China",Coalmine accidents; Management misconduct behavior; Structural model,,Article,Scopus,,R,Scope irrelevant,Unclassified,,,,,,,N/A,,N/A,,,,,,
2-s2.0-33750953435,Werkö L.,Utredning av misstänkt forskningsfusk. Utlåtanden från Vetenskapsrådet inte tillräckligt bra som norm,2006,[No abstract available],Lakartidningen,,,"Werkö, L.",,"article; human; medical research; peer review; publication; publishing; quality control; scientific misconduct; standard; Sweden; writing; Authorship; Biomedical Research; Editorial Policies; Humans; Peer Review, Research; Periodicals; Plagiarism; Quality Control; Scientific Misconduct; Sweden",Article,Scopus,Swedish,R,Accessibility and language,Unclassified,,,,,,,N/A,,N/A,,,,,,
2-s2.0-33751209775,Morrissey S.R.,Research misconduct,2006,"Federal agencies are developing effective policies to deal with research misconduct, which is the fabrication, falsification, or plagiarism in processing, performing, or reviewing research, or in reporting results. These agencies handle research misconduct allegations according to a government-wide policy developed by the White House office of Science & Technology Policy. The policy sets the basic guidelines for federal agencies but allows them to customize their own policies. One place research misconduct cases can be delegated to is an agency's Office of the Inspector General (OIG), which is an independent body within the agency. That is the arrangement at the National Science Foundation, which focuses about half of its investigative staff on noncriminal cases involving research misconduct. The Department of Defence also uses its OIG to handle research misconduct cases. These cases are directed within DoD's OIG to the Defence Criminal Investigation Service (DCIS).",Chemical and Engineering News,,"C and En Washington, United States","Morrissey, S.R., C and En Washington, United States",,Department of Defence; Office of the Inspector General (OIG); Research misconduct; Public policy; Social aspects; Research and development management,Article,Scopus,,R,Article format or year,Unclassified,,,,,,,N/A,,N/A,,,,,,
2-s2.0-33751276256,"Lalor J.G., Begley C.M., Devane D.",Exploring painful experiences: Impact of emotional narratives on members of a qualitative research team,2006,"Aim. This paper reports a study of the impact of emotional narratives on the well-being of members of a qualitative research team during the conduct of sensitive research. Background. Qualitative data are frequently collected from participants using repeated in-depth interviews when exploring sensitive issues such as loss and grief. The research process can evoke highly emotional responses in the participant and others involved in the study. While consideration has been given to the impact of the research process on participants when a highly affective component is involved, relatively little attention has been given to research team members' experiences. Method. Through analysis of fieldwork records from a grounded theory study of the experiences of women who were carrying a baby with a foetal abnormality, we discuss the affective issues arising in conducting sensitive research. Data sources included two reflexive journals, written comments from two transcribers and the transcript of an interview with the research supervisor. Findings. The core category of 'Connecting with the data' emerged, to which each substantive category relates. Three substantive categories -'bearing to watch,''bearing to listen' and 'bearing to support'- emerged as independent but inter-related aspects of the research process as experienced by the researcher, transcribers and supervisor. Methods of protecting the research team and the integrity of the study when the substantive issue is highly emotive are discussed. Conclusion. The emotional impact of research on participants is normally considered prior to the conduct of any sensitive research, and efforts are made to protect them. The potential for researchers, transcribers and supervisors to be harmed should also be carefully considered when planning a project with significant affective elements. © 2006 The Authors.",Journal of Advanced Nursing,10.1111/j.1365-2648.2006.04039.x,"School of Nursing and Midwifery, Trinity College Dublin, 24, D'Olier St, Dublin 2, Ireland; School of Nursing and Midwifery, Trinity College Dublin, Dublin, Ireland","Lalor, J.G., School of Nursing and Midwifery, Trinity College Dublin, 24, D'Olier St, Dublin 2, Ireland, School of Nursing and Midwifery, Trinity College Dublin, Dublin, Ireland; Begley, C.M., School of Nursing and Midwifery, Trinity College Dublin, Dublin, Ireland; Devane, D., School of Nursing and Midwifery, Trinity College Dublin, Dublin, Ireland",Grief; Interviews; Midwifery research; Nursing research; Research supervision; Sensitive research; Transcriber,"adaptive behavior; article; congenital malformation; emotion; female; fetus; human; human relation; interview; personnel; pregnancy; psychological aspect; qualitative research; Adaptation, Psychological; Emotions; Female; Fetus; Humans; Interviews; Pregnancy; Qualitative Research; Research Personnel; Researcher-Subject Relations",Article,Scopus,,R,Scope irrelevant,Unclassified,,,,,,,N/A,,N/A,,,,,,
2-s2.0-33751324560,Harper M.G.,High tech cheating,2006,"The use of technology has enhanced the convenience, flexibility, and efficiency of both preparatory and continuing education. Unfortunately, academic dishonesty, including plagiarism, has shown a positive correlation with the increased use of technology in education. A review of the literature related to unintended outcomes of the use of technology in nursing education and continuing education was conducted to determine the ethical implications for the nursing profession. Although nursing research dealing with academic and professional misconduct is sparse, evidence suggests that academic dishonesty is a predictor of workplace dishonesty. Given this correlation between unethical classroom behavior and unethical clinical behavior, efforts to staunch academic dishonesty may help allay professional misconduct. A combination of high tech and low tech methods may be used to minimize unethical behaviors among students and practicing professional nurses in order to maintain the integrity of the profession. © 2006 Elsevier Ltd. All rights reserved.",Nurse Education in Practice,10.1016/j.nepr.2006.07.008,"University of Central Florida, Florida Hospital Memorial System, Ormond Beach, FL, 1832 South Central Avenue, Orlando, Flagler Beach, FL 32136, United States","Harper, M.G., University of Central Florida, Florida Hospital Memorial System, Ormond Beach, FL, 1832 South Central Avenue, Orlando, Flagler Beach, FL 32136, United States",Academic dishonesty; Education; Professional misconduct; Technology,,Article,Scopus,,R,Cheating (exclusively),Unclassified,,,,,,,N/A,,N/A,,,,,,
2-s2.0-33751331658,Harper M.G.,High tech cheating,2006,"The use of technology has enhanced the convenience, flexibility, and efficiency of both preparatory and continuing education. Unfortunately, academic dishonesty, including plagiarism, has shown a positive correlation with the increased use of technology in education. A review of the literature related to unintended outcomes of the use of technology in nursing education and continuing education was conducted to determine the ethical implications for the nursing profession. Although nursing research dealing with academic and professional misconduct is sparse, evidence suggests that academic dishonesty is a predictor of workplace dishonesty. Given this correlation between unethical classroom behavior and unethical clinical behavior, efforts to staunch academic dishonesty may help allay professional misconduct. A combination of high tech and low tech methods may be used to minimize unethical behaviors among students and practicing professional nurses in order to maintain the integrity of the profession. © 2006 Elsevier Ltd. All rights reserved.",Nurse Education Today,10.1016/j.nedt.2006.07.012,"University of Central Florida, Florida Hospital Memorial System, Ormond Beach, FL, 1832 South Central Avenue, Orlando, Flagler Beach, FL 32136, United States","Harper, M.G., University of Central Florida, Florida Hospital Memorial System, Ormond Beach, FL, 1832 South Central Avenue, Orlando, Flagler Beach, FL 32136, United States",Academic dishonesty; Education; Professional misconduct; Technology,"article; education; educational technology; ethics; health personnel attitude; health service; human; Internet; methodology; morality; nursing education; nursing research; nursing student; professional competence; professional misconduct; psychological aspect; publishing; recumbency; standard; statistics; teaching; utilization review; workplace; Attitude of Health Personnel; Computer-Assisted Instruction; Deception; Education, Distance; Education, Nursing, Baccalaureate; Education, Nursing, Continuing; Educational Technology; Health Services Needs and Demand; Humans; Internet; Morals; Nursing Research; Plagiarism; Professional Competence; Professional Misconduct; Students, Nursing; Workplace",Article,Scopus,,R,"Duplicate, incomplete, or retracted",Unclassified,,,,,,,N/A,,N/A,,,,,,
2-s2.0-33751508783,"Foladori P., Laura B., Gianni A., Giuliano Z.","Effects of sonication on bacteria viability in wastewater treatment plants evaluated by flow cytometry-Fecal indicators, wastewater and activated sludge",2007,"The application of sonication to wastewater or sludge contributes to the dispersion of aggregates, the solubilisation of particulate matter with an increase in its biodegradability, the damage of microorganisms due to the loss of cellular membrane integrity. This research is aimed at investigating the effects of sonication at 20 kHz frequency on viability of microorganisms present in raw wastewater and activated sludge taken from a municipal wastewater treatment plant, as well as pure strains of Escherichia coli and E. faecalis. Flow cytometry was applied for the identification and quantification of viable and dead bacteria free in the bulk liquid, after the fluorescent staining of cellular nucleic acids. The main results showed that: (i) cells of E. coli were highly sensitive to sonication, even at low specific ultrasonic energy (Es), and disintegration of a large amount of cells was observed; (ii) on the contrary E. faecalis were more resistant than E. coli, even if high levels of Es were applied; (iii) bacteria in raw wastewater exhibited a dynamic of viable and dead bacteria similar to E. coli; (iv) in activated sludge samples, low levels of Es produced a prevalent disaggregation of flocs releasing single cells in the bulk liquid, while disruption of bacteria was induced only by very high levels of Es. © 2006 Elsevier Ltd. All rights reserved.",Water Research,10.1016/j.watres.2006.08.021,"Department of Civil and Environmental Engineering, University of Trento, Via Mesiano, 77, 38050 Trento, Italy; SOIS Biological and Chemical Laboratories, Autonomous Province of Trento, via Pozzo, 6, 38100 Trento, Italy","Foladori, P., Department of Civil and Environmental Engineering, University of Trento, Via Mesiano, 77, 38050 Trento, Italy; Laura, B., SOIS Biological and Chemical Laboratories, Autonomous Province of Trento, via Pozzo, 6, 38100 Trento, Italy; Gianni, A., Department of Civil and Environmental Engineering, University of Trento, Via Mesiano, 77, 38050 Trento, Italy; Giuliano, Z., Department of Civil and Environmental Engineering, University of Trento, Via Mesiano, 77, 38050 Trento, Italy",Activated sludge; Bacteria viability; Cellular membrane integrity; Flow cytometry; Sonication; Wastewater,"Activated sludge process; Bacteria; Biological membranes; Dispersions; Wastewater; Water treatment plants; Activated sludge; Bacteria viability; Cellular membrane integrity; Flow cytometry; Sonication; Wastewater treatment; fluorescent dye; Activated sludge process; Bacteria; Biological membranes; Dispersions; Wastewater; Wastewater treatment; Water treatment plants; acoustic method; activated sludge; biodegradation; coliform bacterium; flow cytometry; nucleic acid; ultraviolet radiation; viability; wastewater; activated sludge; article; bacterial cell; bacterial strain; bacterium identification; controlled study; Escherichia; Escherichia coli; escherichia faecalis; feces microflora; flow cytometry; microorganism; nonhuman; priority journal; quantitative analysis; ultrasound; waste water; waste water management; waste water treatment plant; Feces; Flow Cytometry; Microbial Viability; Sewage; Sonication; Waste Disposal, Fluid; Bacteria (microorganisms); Escherichia coli",Article,Scopus,,R,Scope irrelevant,Unclassified,,,,,,,N/A,,N/A,,,,,,
2-s2.0-33845255266,Budiawan,Seeing the communist past through the lens of a CIA consultant: Guy J. Pauker on the Indonesian Communist Party before and after the '1965 Affair',2006,"This paper explores Guy J. Pauker's works on Indonesia in the 1960s, particularly the ones concerning the Indonesian Communist Party (PKI) before and after the killing of six top Army officers on 30 September 1965 (called the '1965 Affair' for short). Of Western scholars working on Indonesia in 1960s, Pauker was indeed infamous. Being a consultant for the CIA-sponsored RAND Corporation has made his academic integrity doubtful. In addition, his active roles in several historical events in Indonesia in the 1960s have given his scholarship a bad reputation. Consequently, it is his name, rather than his works, that has often been mentioned and associated with what happened in Indonesia in the 1960s. However, this paper argues that precisely because of such a position, his pre- '1965 Affair' works were to give a cool report and analysis of the current history, through which one can understand better the PKI before it was exterminated due to being accused of masterminding the killing of six top Army officers. Through these works the narrative of the Communist past can ironically be freed from the demonizing image constructed by the New Order regime. Yet, his post- '1965 Affair' works were not only in parallel with, but also a part - if not the core - of the demonization as such. Through his ways of seeing the PKI in 1960s, one can see the shift from Baconian knowledge/power to Foucaultian power/knowledge relations.",Inter-Asia Cultural Studies,10.1080/14649370600983238,,Budiawan,CIA; Pauker; PKI; Suharto's New Order; Sukarno,,Article,Scopus,,R,Scope irrelevant,Unclassified,,,,,,,N/A,,N/A,,,,,,
2-s2.0-33845389940,"Connelly B.S., Lilienfeld S.O., Schmeelk K.M.","Information exchange article integrity tests and morality: Associations with ego development, moral reasoning, and psychopathic personality",2006,"Although past research has shown links between integrity tests and the Big Five personality traits, little is known about the relationship between integrity and other individual difference constructs used to predict moral behavior. The present study expands this research by examining the relationships between ego development, moral reasoning, psychopathic personality, and three commonly used integrity tests. Both overt and personality-based integrity tests showed the strongest (negative) correlations with psychopathic personality but only modest correlations with ego development and moral reasoning. On the whole, these findings suggest that integrity tests may be more closely related to overt moral behavior than to moral reasoning. © 2006 Blackwell Publishing Ltd.",International Journal of Selection and Assessment,10.1111/j.1468-2389.2006.00335.x,"University of Minnesota, United States; Emory University, United States; Florida State University, United States; Department of Psychology, Elliott Hall, 75 East River Rd., Minneapolis, MN 55404, United States","Connelly, B.S., University of Minnesota, United States, Department of Psychology, Elliott Hall, 75 East River Rd., Minneapolis, MN 55404, United States; Lilienfeld, S.O., Emory University, United States; Schmeelk, K.M., Florida State University, United States",,,Article,Scopus,,R,Scope irrelevant,Unclassified,,,,,,,N/A,,N/A,,,,,,
2-s2.0-33845432357,"Cullis I.G., Jenner D., Brant D., Huggett I., Lynch N.J., Woodley C.",The design and flight performance of advanced carrier projectiles at hypervelocity,2006,"The ability to destroy the key assets of an enemy is an important goal of an attacking force and requires an agile and adaptable military capability effective against a number of very different threats. In ballistics, this contributes to an interest in moving to higher projectile velocities to benefit from the potential to increase the range of a projectile. It also generates an interest in the study of the benefits of increased kinetic energy that can be delivered to a target. The paper describes the work to produce a projectile design solution under certain constraints but with an impact velocity of about 2 km s-1, good in-bore and in-flight stability and acceptable retardation at the target. The paper shows that a projectile with these characteristics was achieved with a projectile mass of 8.1 kg. The second phase of the research programme was concerned with building a hollow aluminium carrier shell. The paper describes the research to assess the integrity and stability of the projectile under gun launch conditions, to demonstrate acceptable dispersion and impact yaw at the target and to demonstrate a minimum impact velocity of 2.1 km s-1. © 2006 Elsevier Ltd. All rights reserved.",International Journal of Impact Engineering,10.1016/j.ijimpeng.2006.09.087,"QinetiQ, Sevenoaks, Kent TN14 7BP, United Kingdom","Cullis, I.G., QinetiQ, Sevenoaks, Kent TN14 7BP, United Kingdom; Jenner, D., QinetiQ, Sevenoaks, Kent TN14 7BP, United Kingdom; Brant, D., QinetiQ, Sevenoaks, Kent TN14 7BP, United Kingdom; Huggett, I., QinetiQ, Sevenoaks, Kent TN14 7BP, United Kingdom; Lynch, N.J., QinetiQ, Sevenoaks, Kent TN14 7BP, United Kingdom; Woodley, C., QinetiQ, Sevenoaks, Kent TN14 7BP, United Kingdom",Carrier shells; Flight stability; Gun design; Kinetic energy projectiles,Ballistics; Kinetic energy; Launching; Military applications; Product design; Carrier shell; Impact velocity; Projectile design; Projectile mass; Projectiles,Article,Scopus,,R,Scope irrelevant,Unclassified,,,,,,,N/A,,N/A,,,,,,
2-s2.0-33845771401,Aroutiounian R.,Principles and results of genetic monitoring of chemical mutagens and radiation effects in Armenia,2006,"The genetic effects of environmental pollution in Armenia are presented. Most of them are underway at Yerevan State University in cooperation with other institutions in Armenia, Germany, France and USA. The results of genetic monitoring of effects of environmental pollution obtained by different methods are presented. The routine analyses of chromosomal aberrations in groups of genetic risk can give data only about nonspecific action of environmental pollutants. The detection of genotoxic effects became more differentiated after studying - clastogenic factors (ultrafiltrates of blood plasma). FISH analysis was used in groups of patients with leukemia and inborn defects. We applied the Comet Assay to study DNA damage and repair in leukocytes of Chernobyl accident liquidators and patients with familial Mediterranean fever. The results showed an increased sensitivity or changed repair capacity of DNA of their cells exposed to UV-C. Analysis of micronuclei induction in exfoliated cells revealed the significant increase of chromosomal damage and their nondisjunction in the groups exposed to mutagens. For the investigation of groups of genetic risk in human populations we apply programmes with combination of presented methods. Cytogenetic programmes are usually combined with epidemiological data. Our research group is responsible for the genetic monitoring of the Armenian nuclear power plant and its environment. The results of chromosomal and point mutations monitoring in plants are presented. © 2006 Springer.",NATO Security through Science Series B: Physics and Biophysics,10.1007/1-4020-4956-0_12,"Department of Genetics and Cytology, Yerevan State University, 375025 Yerevan, Armenia","Aroutiounian, R., Department of Genetics and Cytology, Yerevan State University, 375025 Yerevan, Armenia",,,Article,Scopus,,R,Scope irrelevant,Unclassified,,,,,,,N/A,,N/A,,,,,,
2-s2.0-33845773836,"Carpenter D.D., Harding T.S., Finelli C.J., Montgomery S.M., Passow H.J.",Engineering students' perceptions of and attitudes towards cheating,2006,"Academic dishonesty has become a serious problem at institutions of higher learning. This is particularly true in engineering where, according to previous research, engineering undergraduates are among the most likely to cheat in college. To investigate this concern, the authors embarked on a research project whose goal was to develop a better understanding of what students and faculty perceive as cheating and to use this knowledge to help instructors and institutions increase the level of academic integrity among students. The primary instrument for this project was a seven-page survey that was administered to 643 engineering and pre-engineering undergraduates at eleven institutions, ranging from community colleges to large research universities. This manuscript provides an overview of the descriptive data from the PACES-1 Survey organized around the following questions: what is student cheating and how often does it occur; why do students cheat; and what methods can be used to reduce or stop cheating?",Journal of Engineering Education,,"Civil Engineering Department, Lawrence Technological University, United States; Industrial and Manufacturing Enghieering Department, Kettering University, United States; Center for Research on Learning and Teaching North, University of Michigan, United States; Chemical Engineering Department, University of Michigan, United States; School of Education, University of Michigan, United States; 21000 W. Ten Mile Road, Southfield, MI 48075, United States; Industrial and Manufacturing Engineering Department, Kettering University, 1700 W. Third Ave., Flint, MI 48504, United States; 1071 Palmer Commons, 100 Washtenw Avenue, Ann Arbor, MI 48109, United States; 3094 H H Dow, Ann Arbor, MI 48109, United States; P.O. Box 113, Etna, NH 03750, United States","Carpenter, D.D., Civil Engineering Department, Lawrence Technological University, United States, 21000 W. Ten Mile Road, Southfield, MI 48075, United States; Harding, T.S., Industrial and Manufacturing Enghieering Department, Kettering University, United States, Industrial and Manufacturing Engineering Department, Kettering University, 1700 W. Third Ave., Flint, MI 48504, United States; Finelli, C.J., Center for Research on Learning and Teaching North, University of Michigan, United States, 1071 Palmer Commons, 100 Washtenw Avenue, Ann Arbor, MI 48109, United States; Montgomery, S.M., Chemical Engineering Department, University of Michigan, United States, 3094 H H Dow, Ann Arbor, MI 48109, United States; Passow, H.J., Civil Engineering Department, Lawrence Technological University, United States, School of Education, University of Michigan, United States, P.O. Box 113, Etna, NH 03750, United States",Academic integrity; Cheating; Ethics,Academic integrity; Cheating; Ethics; Research universities; College buildings; Social aspects; Students; Surveys; Engineering education,Article,Scopus,,R,Cheating (exclusively),Unclassified,,,,,,,N/A,,N/A,,,,,,
2-s2.0-33845802169,"Whitley E.A., Hosein I.R., Angell I.O., Davies S.",Reflections on the academic policy analysis process and the UK identity cards scheme,2007,"There is an increasing rhetoric from politicians for universities to become more involved in policy analysis and policy research. In this article, we reflect on our experiences of the analysis we conducted into the legislation to introduce biometric identity cards in the United Kingdom. We highlight how our work had direct consequences for the ongoing policy deliberation around this controversial piece of legislation. In particular, we highlight our role in the debate surrounding the government's figures for identity fraud and the concerns about the likely cost of the scheme to the government and taxpayer. We end the article by discussing some of the practical realities of such a foray into real politik.",Information Society,10.1080/01972240601059060,"Information Systems Group, Department of Management, London School of Economics and Political Science, London, United Kingdom; Information Systems Group, Department of Management, London School of Economics and Political Science, Houghton Street, London WC2A 2AE, United Kingdom","Whitley, E.A., Information Systems Group, Department of Management, London School of Economics and Political Science, London, United Kingdom, Information Systems Group, Department of Management, London School of Economics and Political Science, Houghton Street, London WC2A 2AE, United Kingdom; Hosein, I.R., Information Systems Group, Department of Management, London School of Economics and Political Science, London, United Kingdom; Angell, I.O., Information Systems Group, Department of Management, London School of Economics and Political Science, London, United Kingdom; Davies, S., Information Systems Group, Department of Management, London School of Economics and Political Science, London, United Kingdom",Academic integrity; Identity cards; Identity fraud; Interventions; Policy analysis,,Article,Scopus,,R,"Research ethics, bioethics, clinical ethics, or ethical role of universities in society",Unclassified,,,,,,,N/A,,N/A,,,,,,
2-s2.0-33845896003,Tersigni M.A.,Frozen human bone: A microscopic investigation,2007,"The taphonomic effects of prolonged extreme cold and freezing on human bone have received little research attention. Questions of specific interest include whether previously frozen bone can be identified and whether freezing alters the structural integrity enough to prevent histological aging. There is no evidence from previous studies that freezing damages the structural integrity, and to date no research investigating the freezing process on bone microstructure has been undertaken. This research attempts to distinguish histologically previously frozen bone from nonfrozen bone by identifying patterned defects. To determine the effects of freezing in bone microstructure using light and scanning electron microscopy (SEM), several human bone sections were subjected to prolonged freezing and allowed to thaw before thin sectioning. Light microscopy failed to demonstrate statistically significant differences between frozen and nonfrozen specimens. SEM analysis revealed fractures, although these lacked pattern and did not occur systematically throughout the section. Evidence of microstructural changes caused by liquid expansion, however, was remarkable but did not alter the structural integrity of the microstructure. The results of this study suggest that freezing does not alter the process of histomorphological analysis. Copyright © 2006 by American Academy of Forensic Sciences.",Journal of Forensic Sciences,10.1111/j.1556-4029.2006.00325.x,"Joint POW/MIA Accounting Command, Central Identification Laboratory, Hickam AFB, HI 96853-5530, United States; 10052 Calle de Palencia, Navarre, FL 32566, United States","Tersigni, M.A., Joint POW/MIA Accounting Command, Central Identification Laboratory, Hickam AFB, HI 96853-5530, United States, 10052 Calle de Palencia, Navarre, FL 32566, United States",Bone histology; Forensic anthropology; Forensic science; Frozen human bone; Scanning electron microscope,article; bone; controlled study; cryopreservation; forensic medicine; fracture; freezing; human; human tissue; microscopy; morphometrics; priority journal; scanning electron microscopy; statistical significance; structure analysis; time; tissue preservation; Forensic Pathology; Frozen Sections; Humans; Leg Bones; Microscopy,Article,Scopus,,R,Scope irrelevant,Unclassified,,,,,,,N/A,,N/A,,,,,,
2-s2.0-33846206084,"Ramim M., Levy Y.",Securing e-learning systems: A case of insider cyber attacks and novice IT management in a small university,2006,"The growing use of e-learning systems has been documented by numerous studies (Levy, 2005). Yet in spite of this enormous growth, little attention has been given to the issue of security of e-learning systems both in research and in practice. Security of e-learning systems has a unique challenge as these systems are accessed and managed via the Internet by thousands of users over hundreds of networks. However, the Internet can pose security threats such as unauthorized access, hacking/ cracking, obtaining sensitive information, and altering data and configuration, as well as enabling academic misconduct incidents (Freeh, 2000; Ramim, 2005; Sridhar&Bhasker, 2003). At the same time, cyber attacks have proliferated significantly in recent years. As a result, proper IT policies and procedures, in particular ones related to security of information systems, have become critical for organizations. This case study was written from the IS consultant's point of view and addresses the issues related to insider cyber attacks combined with novice IT management knowledge in a small university. After a year of substantial growth to its online learning program, the university in this case study experienced a devastating event that halted all academic activities enabled by the institution's e-learning system. This case reveals that internal cyber attack as well as lack of proper IT policies and procedures all resulted in multiple instances of damage to the e-learning system. The case provides detailed documentation on the security audit performed as well as stimulation for class discussions on actions to be taken as a result of the insider's cyber attack. Additionally, this case study attempts to provide a starting point on discussions in the area of security related to e-learning systems. It is hoped that this case study will stimulate discussions among practitioners and researchers related to e-learning systems security, and that it will help prevent such incidents from occurring at other academic institutions. Copyright © 2006, Idea Group Inc.",Journal of Cases on Information Technology,,"Nova Southeastern University, United States","Ramim, M., Nova Southeastern University, United States; Levy, Y., Nova Southeastern University, United States",Cyber crime; e-learning systems; e-learning systems security; Insider cyber attack; Insider cyber threats; Insider IS misuse; IT policies; IT procedures,Cybernetics; Information management; Information retrieval systems; Information technology; Internet; Cyber crime; E-learning systems; E-learning systems security; Insider cyber attack; Insider cyber threats; Insider IS misuse; IT policies; IT procedures; Learning systems,Article,Scopus,,R,Scope irrelevant,Unclassified,,,,,,,N/A,,N/A,,,,,,
2-s2.0-33846298458,"Zhao B., Wu Y., Jiao F., Gao G.F., Zhu X.S.",Experimental research on surface integrity of ceramic nanocomposites in two-dimensional ultrasonic vibration grinding,2007,"The grain cutting trace of elliptical spiral in workpiece two-dimensional ultrasonic vibration grinding(WTDUVG) is defined, the reason of machining accuracy improvement by applying two-dimensional ultrasonic vibration is discussed. Adopting two-dimensional ultrasonic composite processing, the influences of grinding depth, worktable velocity, wheel granularity on the surface roughness of Al2O3/ZrO2 ceramic nanocomposites were described. Experimental results of AFM microstructure show that the material removal model in WTDUVG is dominated by ductile flow of material, some crystal refinement, the crush powder and grain pull-out are visible and there is almost no fracture. Furthermore, the surface roughness in WTDUVG with coarse grit is about 30-40% less than that in CG under identical grinding condition; the qualitative analysis of X-diffraction results indicated that the surface phases are composed of α-Al2O3, t-ZrO2 and small quality m-ZrO2, there are amorphous phase in the surface both with and without vibration grinding. M-zirconia phase transitions rule in vibration and conventional grinding was found. Under definitive grinding conditions, the material removal mechanism of inelastic deformation is the principal removal mechanism of Al2O 3/ZrO2 ceramic nanocomposites, the grit size of diamond wheel and vibration grinding mode have important influence on material removal mechanism of ceramic nanocomposites.",Key Engineering Materials,10.4028/0-87849-416-2.445,"School of Mechanical and Power Engineering, Henan Polytechnic University, Jiaozuo, China; School of Mechanical Engineering, Shanghai Jiao Tong University, Shanghai, China","Zhao, B., School of Mechanical and Power Engineering, Henan Polytechnic University, Jiaozuo, China, School of Mechanical Engineering, Shanghai Jiao Tong University, Shanghai, China; Wu, Y., School of Mechanical Engineering, Shanghai Jiao Tong University, Shanghai, China; Jiao, F., School of Mechanical Engineering, Shanghai Jiao Tong University, Shanghai, China; Gao, G.F., School of Mechanical and Power Engineering, Henan Polytechnic University, Jiaozuo, China; Zhu, X.S., School of Mechanical Engineering, Shanghai Jiao Tong University, Shanghai, China",Ceramic nanocomposites; Surface morphology; Surface phase transformation; Surface roughness; Two-dimensional vibration grinding; Ultrasonic,Ceramic nanocomposites; Surface phase transformation; Ultrasonic composite processing; Ultrasonic vibration grinding; Alumina; Atomic force microscopy; Grain size and shape; Grinding (comminution); Microstructure; Morphology; Nanostructured materials; Surface chemistry; Surface roughness; X ray diffraction; Ceramic materials,Article,Scopus,,R,Scope irrelevant,Unclassified,,,,,,,N/A,,N/A,,,,,,
2-s2.0-33846460845,Couzin J.,Breakthrough of the year. Breakdown of the year: scientific fraud.,2006,[No abstract available],Science,10.1126/science.314.5807.1853,,"Couzin, J.",,article; cell line; embryonic stem cell; human; publication; publishing; scientific misconduct; standard; Cell Line; Embryonic Stem Cells; Humans; Periodicals; Publishing; Scientific Misconduct,Article,Scopus,English,R,Article format or year,Unclassified,,,,,,,N/A,,N/A,,,,,,
2-s2.0-33846674645,"Estaville L.E., Brown B.J., Caldwell S.",Geography undergraduate program assessment,2006,"Assessment of geography undergraduate programs, which incorporate external reviews and concomitant departmental self-studies, attempt to assure pedagogical excellence within uncompromising commitments to successful student learning outcomes, currency of the knowledge and skills imparted, and continuous programmatic improvement. Programmatic assessment underscores the academic integrity, quality, and commitment of universities and their departments. © 2006 National Council for Geographic Education.",Journal of Geography,,"Texas State University-San Marcos, San Marcos, TX, United States","Estaville, L.E., Texas State University-San Marcos, San Marcos, TX, United States; Brown, B.J., Texas State University-San Marcos, San Marcos, TX, United States; Caldwell, S., Texas State University-San Marcos, San Marcos, TX, United States",Action plans; Assessment perspectives; Assessment processes; Undergraduate program assessment,assessment method; geography education; student,Article,Scopus,,R,Scope irrelevant,Unclassified,,,,,,,N/A,,N/A,,,,,,
2-s2.0-33846796107,"Mahabir S., Spitz M.R., Barrera S.L., Beaver S.H., Etzel C., Forman M.R.","Dietary zinc, copper and selenium, and risk of lung cancer",2007,"Zinc, copper and selenium are important cofactors for several enzymes that play a role in maintaining DNA integrity. However, limited epidemiologic research on these dietary trace metals and lung cancer risk is available. In an ongoing study of 1,676 incident lung cancer cases and 1,676 matched healthy controls, we studied the associations between dietary zinc, copper and selenium and lung cancer risk. Using multiple logistic regression analysis, the odds ratios (OR) and 95% confidence intervals (CI) of lung cancer for all subjects by increasing quartiles of dietary zinc intake were 1.0, 0.80 (0.65-0.99), 0.64 (0.51-0.81), 0.57 (0.42-0.75), respectively (p trend = 0.0004); similar results were found for men. For dietary copper, the ORs and 95% CI for all subjects were 1.0, 0.59 (0.49-0.73), 0.51 (0.41-0.64), 0.34 (0.26-0.45), respectively (p trend < 0.0001); similar reductions in risk and trend were observed by gender. Dietary selenium intake was not associated with risk, except for a significant inverse trend (p = 0.04) in men. Protective trends (p < 0.05) against lung cancer with increased dietary zinc intake were also found for all ages, BMI > 25, current smokers, pack-years ≤30, light drinkers and participants without emphysema. Increased dietary copper intake was associated with protective trends (p < 0.05) across all ages, BMI, smoking and vitamin/ mineral supplement categories, pack-years ≤30 and 30.1-51.75 and participants without emphysema. Our results suggest that dietary zinc and copper intakes are associated with reduced risk of lung cancer. Given the known limitations of case-control studies, these findings must be interpreted with caution and warrant further investigation. © 2006 Wiley-Liss, Inc.",International Journal of Cancer,10.1002/ijc.22451,"Department of Epidemiology, University of Texas M.D. Anderson Cancer Center, Houston, TX, United States; Department of Epidemiology-Unit 1340, CPB4.3241, University of Texas M.D. Anderson Cancer Center, 1155 Pressler Blvd., Houston, TX 77030, United States","Mahabir, S., Department of Epidemiology, University of Texas M.D. Anderson Cancer Center, Houston, TX, United States, Department of Epidemiology-Unit 1340, CPB4.3241, University of Texas M.D. Anderson Cancer Center, 1155 Pressler Blvd., Houston, TX 77030, United States; Spitz, M.R., Department of Epidemiology, University of Texas M.D. Anderson Cancer Center, Houston, TX, United States; Barrera, S.L., Department of Epidemiology, University of Texas M.D. Anderson Cancer Center, Houston, TX, United States; Beaver, S.H., Department of Epidemiology, University of Texas M.D. Anderson Cancer Center, Houston, TX, United States; Etzel, C., Department of Epidemiology, University of Texas M.D. Anderson Cancer Center, Houston, TX, United States; Forman, M.R., Department of Epidemiology, University of Texas M.D. Anderson Cancer Center, Houston, TX, United States",Dietary trace metals; Lung cancer,copper; selenium; trace metal; zinc; adult; aged; article; body mass; cancer risk; controlled study; dietary intake; drinking behavior; female; gender; human; lung cancer; major clinical study; male; mineral intake; multivariate logistic regression analysis; priority journal; risk reduction; smoking; vitamin supplementation; Aged; Body Mass Index; Cohort Studies; Copper; Diet; Female; Humans; Lung Neoplasms; Male; Middle Aged; Risk; Selenium; Zinc,Article,Scopus,,R,Scope irrelevant,Unclassified,,,,,,,N/A,,N/A,,,,,,
2-s2.0-33846807721,Orr L.,Underwater welding,2006,"OK Welding (Marine) of Belfast has developed its patented Water Back Welding method for grade EH steels in response to actual conditions onboard an FPSO processing crude oil offshore Equitorial Guinea. The company's research department was responsible for the development of the technique, taking into consideration two main criteria, welding without hydrogen cracking and removing hydrogen during welding. The method provides a more efficient process for treating corrosion of a metal plate backed by a liquid such as seawater. A Manual Metal Arc (MMA) electrode is used, which is supplied in a small sealed carton to keep the electrode dry for a limited period. The method allows one or more of the corroded areas to be treated by welding across it in steps using an electrode whose size is strictly controlled. Water Back Welding has been tested across a range of sea temperature from 2°C to 28°C and found to work satisfactorily.",Shipping World and Shipbuilder,,OK Marine Group,"Orr, L., OK Marine Group",,,Article,Scopus,,R,Scope irrelevant,Unclassified,,,,,,,N/A,,N/A,,,,,,
2-s2.0-33846844933,"Gao G., Zhao B., Liu C., Kong Q.",Research on surface integrity in ultrasonic elliptic vibration grinding of ZTA ceramics,2006,"The cutting trace of abrasive grain in ultrasonic elliptic vibration grinding was modelled, and its influence on surface finish improvement was discussed. Experiments of grinding conditions on the ground surface topography of ZTA ceramic workpiece was carried out. Experimental results showed that there were some crystal refinement and little fracture on the ground surface, which revealed that the plastic material removal mechanism was dominant in the process. Meanwhile the surface finish was improved by 30~40% compared with traditional grinding method. Furthermore, XRD analysis indicated that the surface phases were composed of α- Al2O3, t- ZrO2 and a small amount of m-ZrO2, and there was no amorphous phase on the ground surface both with and without ultrasonic assistance. Therefore, the removal mechanism of no-elastic deformation in ultrasonic elliptic vibration grinding of ZTA ceramics had important influence on the surface integrity.",Jingangshi yu Moliao Moju Gongcheng/Diamond and Abrasives Engineering,,"School of Mechanical Engineering, Tongji University, Shanghai 200093, China; School of Mechanical and Power Engineering, Henan Polytechnic University, Jiaozuo 454000, China","Gao, G., School of Mechanical Engineering, Tongji University, Shanghai 200093, China, School of Mechanical and Power Engineering, Henan Polytechnic University, Jiaozuo 454000, China; Zhao, B., School of Mechanical and Power Engineering, Henan Polytechnic University, Jiaozuo 454000, China; Liu, C., School of Mechanical and Power Engineering, Henan Polytechnic University, Jiaozuo 454000, China; Kong, Q., School of Mechanical Engineering, Tongji University, Shanghai 200093, China",Elliptic vibration; Surface integrity; Ultrasonic machining; ZTA ceramics,,Article,Scopus,,R,Scope irrelevant,Unclassified,,,,,,,N/A,,N/A,,,,,,
2-s2.0-33846906973,Holden C.,"Scientific misconduct. Former Hwang colleague faked monkey data, U.S. says.",2007,[No abstract available],Science,,,"Holden, C.",,"animal; article; cell nucleus transplantation; cloning; embryonic stem cell; Korea; Macaca; pluripotent stem cell; public health service; publishing; scientific misconduct; United States; Animals; Cloning, Organism; Embryonic Stem Cells; Korea; Macaca mulatta; Nuclear Transfer Techniques; Pluripotent Stem Cells; Publishing; Scientific Misconduct; United States; United States Office of Research Integrity",Article,Scopus,,R,Article format or year,Unclassified,,,,,,,N/A,,N/A,,,,,,
2-s2.0-33846923157,Normile D.,Scientific misconduct. Japan's universities take action.,2007,[No abstract available],Science,,,"Normile, D.",,article; financial management; Japan; medical research; personnel; scientific misconduct; standard; university; Biomedical Research; Japan; Research Personnel; Research Support; Scientific Misconduct; Universities,Article,Scopus,English,R,Article format or year,Unclassified,,,,,,,N/A,,N/A,,,,,,
2-s2.0-33846951853,[No author name available],Breeding cheats,2007,[No abstract available],Nature,10.1038/445242a,,,,"article; competitive behavior; ethics; human; information processing; mental stress; personnel; psychological aspect; scientific misconduct; Competitive Behavior; Data Collection; Humans; Research Personnel; Scientific Misconduct; Stress, Psychological",Article,Scopus,English,R,Article format or year,Unclassified,,,,,,,N/A,,N/A,,,,,,
2-s2.0-33846981935,[No author name available],Misconduct? It's all academic...,2007,[No abstract available],Nature,10.1038/445240a,,,,article; ethics; Europe; legal aspect; personnel; practice guideline; psychological aspect; scientific misconduct; standard; United States; university; whistleblowing; Europe; Guidelines; Research Personnel; Scientific Misconduct; United States; Universities; Whistleblowing,Article,Scopus,,R,Article format or year,Unclassified,,,,,,,N/A,,N/A,,,,,,
2-s2.0-33846990491,"Hayes N., Introna L.",Systems for the production of plagiarists? The implications arising from the use of plagiarism detection systems in UK universities for Asian learners,2005,"This paper argues that the inappropriate framing and implementation of plagiarism detection systems in UK universities can unwittingly construct international students as 'plagiarists'. It argues that these systems are often implemented with inappropriate assumptions about plagiarism and the way in which new members of a community of practice develop the skills to become full members of that community. Drawing on the literature and some primary data it shows how expectations, norms and practices become translated and negotiated in such a way that legitimate attempts to conform with the expectations of the community of practice often become identified as plagiarism and illegitimate attempts at cheating often become obscured from view. It argues that this inappropriate framing and implementation of plagiarism detection systems may make academic integrity more illusive rather than less. It argues that in its current framing - as systems for 'detection and discipline' - plagiarism detection systems may become a new micro-politics of power with devastating consequences for those excluded. © Springer Science+Business Media, Inc. 2006.",Journal of Academic Ethics,10.1007/s10805-006-9006-4,"Centre for the Study of Technology and Organisation, Lancaster University Management School, Lancaster University, Lancaster, LA1 4YX, United Kingdom","Hayes, N., Centre for the Study of Technology and Organisation, Lancaster University Management School, Lancaster University, Lancaster, LA1 4YX, United Kingdom; Introna, L., Centre for the Study of Technology and Organisation, Lancaster University Management School, Lancaster University, Lancaster, LA1 4YX, United Kingdom",Alienation; Communities of practice; Discrimination; International students; Plagiarism; Plagiarism detection systems,,Article,Scopus,,R,Cheating (exclusively),Unclassified,,,,,,,N/A,,N/A,,,,,,
2-s2.0-33847006975,"Odling-Smee L., Giles J., Fuyuno I., Cyranoski D., Marris E.",Where are they now?,2007,[No abstract available],Nature,10.1038/445244a,,"Odling-Smee, L.; Giles, J.; Fuyuno, I.; Cyranoski, D.; Marris, E.",,animal; article; Denmark; ethics; Germany; human; Japan; mouse; personnel; scientific misconduct; United Kingdom; United States; Animals; Denmark; Germany; Great Britain; Humans; Japan; Mice; Research Personnel; Scientific Misconduct; United States,Article,Scopus,English,R,Article format or year,Unclassified,,,,,,,N/A,,N/A,,,,,,
2-s2.0-33847021444,"Lin D.-W., Chen Y.-M.",Dynamic web page protection based on content integrity,2007,"The web is the most widely available service on the internet, but it is difficult to bullet-proof a web system. In this research, an integrity-based web page protection method is proposed to ensure that the service provided is as expected from the original business logic design. In our method, integrity violation means that an error has occurred. The proposed method is lightweight and the false alarm rate is extremely low. Management of signature updating is not needed. Finally, the experimental performance of the system is better than that of the traditional signature-based detection systems, and has little impact on system performance. Copyright © 2007 Inderscience Enterprises Ltd.",International Journal of Services and Standards,10.1504/IJSS.2007.011831,"National Central University, Chung-li, Taiwan; Institute for Information Industry, Taipei, Taiwan","Lin, D.-W., National Central University, Chung-li, Taiwan, Institute for Information Industry, Taipei, Taiwan; Chen, Y.-M., National Central University, Chung-li, Taiwan",Content integrity; Hash; Honeypot; Intrusion detection; Services; Standards; Web protection,,Article,Scopus,,R,Scope irrelevant,Unclassified,,,,,,,N/A,,N/A,,,,,,
2-s2.0-33847079199,"Kirkman S., Thompson D.R., Watson R., Stewart S.","Are all doctorates equal or are some ""more equal than others""? An examination of which ones should be offered by schools of nursing",2007,"This paper examines the typical and varying routes to doctoral degrees in the UK and other developed countries. It raises the important question of whether university schools of nursing should offer a whole range of options with the potential for sub-optimal higher degree training and therefore ""mediocre"" academics, or resist the ""path of least resistance"" and offer more limited pathways that ensure that only the highest quality training and candidates are associated with what should be the pinnacle of the profession. As such, it seeks to clarify which of the commonly offered routes to doctoral degrees might be most suited to the academic integrity and value of the profession to our patients and the health care system. © 2006 Elsevier Ltd. All rights reserved.",Nurse Education in Practice,10.1016/j.nepr.2006.06.006,"School of Care Sciences, University of Glamorgan, Pontypridd, United Kingdom; Nethersole School of Nursing, Chinese University of Hong Kong, Shatin, N.T., Hong Kong, Hong Kong; Graduate School of Nursing and Midwifery, University of Sheffield, Sheffield, United Kingdom; School of Nursing, University of South Australia, Adelaide, Australia","Kirkman, S., School of Care Sciences, University of Glamorgan, Pontypridd, United Kingdom; Thompson, D.R., Nethersole School of Nursing, Chinese University of Hong Kong, Shatin, N.T., Hong Kong, Hong Kong; Watson, R., Graduate School of Nursing and Midwifery, University of Sheffield, Sheffield, United Kingdom; Stewart, S., School of Nursing, University of South Australia, Adelaide, Australia",Doctorates; Nursing; Schools,"article; education; educational model; human; nursing education; standard; United Kingdom; Education, Nursing, Graduate; Educational Measurement; Great Britain; Humans; Models, Educational",Article,Scopus,,R,Scope irrelevant,Unclassified,,,,,,,N/A,,N/A,,,,,,
2-s2.0-33847096436,"Marcus B., Lee K., Ashton M.C.","Personality dimensions explaining relationships between integrity tests and counterproductive behavior: Big five, or one in addition?",2007,"Although the criterion-related validity of integrity tests is well established, there has not been enough research examining which personality constructs contribute to their criterion-related validity. Moreover, evidence of how well findings on integrity tests in North America generalize to non-English speaking countries is virtually absent. This research addressed these issues with data obtained from employees and students in Canada and Germany (total N = 853). Specifically, we tested the hypotheses that (a) Honesty-Humility, as specified in the HEXACO model of personality, is relatively more important than the Big 5 dimensions of personality in accounting for the criterion-related validity of overt integrity tests, whereas (b) the Big 5 are relatively more important in explaining the validity of personality-based integrity tests. These predictions were tested using 2 criteria (counterproductive work behavior and counterproductive academic behavior) as well as 2 overt and 2 personality-based integrity tests. We found evidence of the expected differences between types of integrity tests largely regardless of culture of the sample, specific test, criterion, or population under research, pointing to some degree of generalizability of findings in integrity testing research. Implications include theoretical refinements in research on integrity testing and encouragement of practical applications beyond North America. © 2007 Blackwell Publishing, Inc.",Personnel Psychology,10.1111/j.1744-6570.2007.00063.x,"University of Western Ontario, London, Ont., Canada; University of Calgary, Canada; Brock University, Canada; Department of Psychology and Management, Organizational Studies Program, University of Western Ontario, London, Ont. N6A 5C2, Canada","Marcus, B., University of Western Ontario, London, Ont., Canada, Department of Psychology and Management, Organizational Studies Program, University of Western Ontario, London, Ont. N6A 5C2, Canada; Lee, K., University of Calgary, Canada; Ashton, M.C., Brock University, Canada",,,Article,Scopus,,R,Scope irrelevant,Unclassified,,,,,,,N/A,,N/A,,,,,,
2-s2.0-33847419938,"Trocky N.M., Fontinha M.",Quality management tools: facilitating clinical research data integrity by utilizing specialized reports with electronic case report forms.,2005,"Data collected throughout the course of a clinical research trial must be reviewed for accuracy and completeness continually. The Oracle Clinical (OC) data management application utilized to capture clinical data facilitates data integrity through pre-programmed validations, edit and range checks, and discrepancy management modules. These functions were not enough. Coupled with the use of specially created reports in Oracle Discoverer and Integrated Review, both ad-hoc query and reporting tools, research staff have enhanced their ability to clean, analyze and report more accurate data captured within and among Case Report Forms (eCRFs) by individual study or across multiple studies.",AMIA ... Annual Symposium proceedings / AMIA Symposium. AMIA Symposium,,Harris Corporation.,"Trocky, N.M., Harris Corporation.; Fontinha, M., Harris Corporation.",,"article; clinical trial; data base; health care quality; human; medical research; organization and management; standard; Biomedical Research; Clinical Trials; Database Management Systems; Humans; Quality Assurance, Health Care",Article,Scopus,,R,Scope irrelevant,Unclassified,,,,,,,N/A,,N/A,,,,,,
2-s2.0-33947131686,"Bamberg S., Möser G.","Twenty years after Hines, Hungerford, and Tomera: A new meta-analysis of psycho-social determinants of pro-environmental behaviour",2007,"The goal of the present paper is a replication as well as an extension of the Hines et al. [(1986/87). Analysis and synthesis of research on responsible environmental behaviour: A meta-analysis. Journal of Environmental Education, 18, 1-8] meta-analysis on psycho-social determinants of pro-environmental behaviour. Based on information from a total of 57 samples the present meta-analysis finds mean correlations between psycho-social variables and pro-environmental behaviour similar to those reported by Hines et al. In a second step, the matrix of pooled correlations is used for a structural equation modelling (SEM) test of theoretically postulated structural relations between eight determinants of pro-environmental behaviour (so-called Meta-analytic SEM (MASEM)). MASEM results confirm that pro-environmental behavioural intention mediate the impact of all other psycho-social variables on pro-environmental behaviour (27% explained variance). Results also confirm that besides attitude and behavioural control personal moral norm is a third predictor of pro-environmental behavioural intention (52% explained variance). The MASEM also indicates that problem awareness is an important but indirect determinant of pro-environmental intention. Its impact seems to be mediated by moral and social norms, guilt and attribution processes. © 2007 Elsevier Ltd. All rights reserved.",Journal of Environmental Psychology,10.1016/j.jenvp.2006.12.002,"Philosophikum II-Fachbereich 03, Universität Gießen, Karl-Glöckner Str. 21E, 35394 Gießen, Germany","Bamberg, S., Philosophikum II-Fachbereich 03, Universität Gießen, Karl-Glöckner Str. 21E, 35394 Gießen, Germany; Möser, G., Philosophikum II-Fachbereich 03, Universität Gießen, Karl-Glöckner Str. 21E, 35394 Gießen, Germany",Meta-analysis; Meta-analytic SEM (MASEM); Norm-activation model; Pro-environmental behaviour; TPB,,Article,Scopus,,R,Scope irrelevant,Unclassified,,,,,,,N/A,,N/A,,,,,,
2-s2.0-33947179875,Frego K.A.,Bryophytes as potential indicators of forest integrity,2007,"Forest integrity has been proposed as one conservation endpoint that integrates desirable characteristics such as natural biodiversity, stand structure and continuity. Although its defining criteria are still under discussion, any surrogates must effectively represent or predict their status, and be easier to measure than the criteria themselves. Bryophytes have been proposed as such surrogates, because they are important components of forest integrity, and considerable research indicates that some groups are sensitive to the changes associated with specific forest management regimes. The objectives of this paper are (1) to review the issues in determining indicators of forest integrity, including desirable qualities in such indicators, (2) to review the state of knowledge concerning bryophytes as components of forest integrity (i.e. their responses to forest management practices), and (3) to assess bryophytes as potential indicators of forest integrity, in terms of both qualities desirable in indicators and our understanding of bryophyte response patterns. Although bryophytes possess some characteristics that suggest potential indicator value, many challenges prevent their reliable application. I highlight key areas in which research is required to identify operational bryophyte indicators of forest integrity. Along with a standardized protocol to select and calibrate such indicators, we urgently require strategic research to compile data on undisturbed reference forests on which to base selection of endpoints; species-specific ecological tolerances, with consideration of complex interactions; mechanisms of response to disturbance, with consideration of temporal aspects; population viability thresholds; and recruitment effects on community assembly. Whether we succeed in finding bryophyte indicators of forest integrity, this research would also provide the data to monitor and interpret the integrity of the bryophyte community. © 2007 Elsevier B.V. All rights reserved.",Forest Ecology and Management,10.1016/j.foreco.2007.01.030,"Department of Biology, University of New Brunswick, 100 Tucker Park Circle, Saint John, NB E2L 4L5, Canada","Frego, K.A., Department of Biology, University of New Brunswick, 100 Tucker Park Circle, Saint John, NB E2L 4L5, Canada",Bryophyte; Community assembly; Disturbance; Diversity; Forest integrity; Indicator,Biodiversity; Ecology; Plants (botany); Bryophytes; Community assembly; Forest integrity; Forestry; biodiversity; bioindicator; biomonitoring; bryophyte; conservation management; disturbance; forest management; recruitment; research work; Ecology; Forest Management; Forests; Plants; Bryophyta; bryophytes,Article,Scopus,,R,Scope irrelevant,Unclassified,,,,,,,N/A,,N/A,,,,,,
2-s2.0-33947403548,"McCormack M., Treloar G.J., Palmowski L., Crawford R.",Modelling direct and indirect water requirements of construction,2007,"Water consumed directly by the construction industry is known to be of little importance. However, water consumed in the manufacture of goods and services required by construction may be significant in the context of a building's life cycle water requirements and the national water budget. This paper evaluates the significance of water embodied in the construction of individual buildings. To do this, an input-output-based hybrid embodied water analysis was undertaken on 17 Australian non-residential case studies. It was found that there is a considerable amount of water embodied in construction. The highest value was 20.1 kilolitres (kL)/m2 gross floor area (GFA), representing many times the enclosed volume of the building, and many years worth of operational water. The water required by the main construction process is minimal. However, the water embodied in building materials is considerable. These findings suggest that the selection of elements and materials has a great impact on a building's embodied water. This research allows the construction industry to evaluate design and construction in broad environmental terms to select options that might be cost neutral or possibly cost positive while retaining their environmental integrity. The research suggests policies focused on operational water consumption alone are inadequate.",Building Research and Information,10.1080/09613210601125383,"Built Environment Research Group, School of Architecture and Building, Deakin University, Geelong, Vic. 3217, Australia; School of Engineering and Information Technology, Deakin University, Geelong, Vic. 3217, Australia","McCormack, M., Built Environment Research Group, School of Architecture and Building, Deakin University, Geelong, Vic. 3217, Australia; Treloar, G.J., Built Environment Research Group, School of Architecture and Building, Deakin University, Geelong, Vic. 3217, Australia; Palmowski, L., School of Engineering and Information Technology, Deakin University, Geelong, Vic. 3217, Australia; Crawford, R., Built Environment Research Group, School of Architecture and Building, Deakin University, Geelong, Vic. 3217, Australia",Australia; Construction; Embodied water; Environmental impacts; Key indicators; Water; Water consumption,Australia; Budget control; Environmental impact; Life cycle; Water analysis; Water management; Embodied water; Key indicators; Water consumption; Construction industry,Article,Scopus,,R,Scope irrelevant,Unclassified,,,,,,,N/A,,N/A,,,,,,
2-s2.0-34047162831,"Granitz N., Loewy D.",Applying ethical theories: Interpreting and responding to student plagiarism,2007,"Given the tremendous proliferation of student plagiarism involving the Internet, the purpose of this study is to determine which theory of ethical reasoning students invoke when defending their transgressions: deontology, utilitarianism, rational self-interest, Machiavellianism, cultural relativism, or situational ethics. Understanding which theory of ethical reasoning students employ is critical, as preemptive steps can be taken by faculty to counteract this reasoning and prevent plagiarism. Additionally, it has been demonstrated that unethical behavior in school can lead to unethical behavior in business; therefore, correcting unethical behavior in school can have a positive impact on organizational ethics. To meet this objective, a content analysis was conducted on the written records of students formally charged with plagiarizing at a large West Coast university. Each case was classified according to the primary ethical reasoning that the student used to justify plagiarism. Results indicate that students predominately invoke deontology, situational ethics, and Machiavellianism. Based on these findings, specific recommendations are offered to curb plagiarism. © Springer Science+Business Media B.V. 2007.",Journal of Business Ethics,10.1007/s10551-006-9171-9,"Cal State Fullerton, United States; Department of Marketing and Business Communication, Cal State Fullerton, 800 North State College Boulevard, Fullerton, CA 92834-6848, United States","Granitz, N., Cal State Fullerton, United States; Loewy, D., Cal State Fullerton, United States, Department of Marketing and Business Communication, Cal State Fullerton, 800 North State College Boulevard, Fullerton, CA 92834-6848, United States",Academic dishonesty; Ethical reasoning; Historic views of plagiarism; History of copyright; Internet plagiarism; Teaching academic integrity; Theories of ethics,,Article,Scopus,,R,Cheating (exclusively),Unclassified,,,,,,,N/A,,N/A,,,,,,
2-s2.0-34147200975,Verhoog H.,The tension between common sense and scientific perception of animals: Recent developments in research on animal integrity,2007,"A distinction can be made between aesthetic or intuitive perception in holistic biology and in daily life, and reductionistic scientific perception based on the search for causal mechanisms. Going from our observations of animals in daily life to observations of animals in scientific experiments implies a transformation. Scientific experiments exclude all values that are important in daily life. For research on the concept of animal welfare it can be shown that excluding values is impossible as this issue lies too close to our daily experience. This means that the empirical and the moral domain of the concept cannot in fact be separated. And by means of the moral domain, background theories about man's relation to nature, about the role of natural science, and about what is morally relevant play a role in definitions of animal welfare. This is illustrated for two bioethical theories: zoocentrism and biocentrism. In the zoocentric theory, only sentient animals are morally relevant. Some consider the argument that genetic engineering violates the integrity of an organism not a moral issue, but an aesthetic one. In a biocentric ethical theory, all living beings have moral relevance; moral and aesthetic issues are then closely related. In such a theory the characteristic nature of an animal is respected and knowledge of this nature is intimately related to a more aesthetic and holistic perception of animals. This paper shows that the ethical attitude towards nature is directly linked to the way human beings perceive nature. In experimental reductionistic science, nature is seen as a material object, subject to mechanistic analysis: when animals are subjected to scientific experiments it is impossible to completely avoid ethical issues, but they are restricted to utilitarian ones. The genetic engineering of animals enhanced awareness of ethical issues directly relating to the technology itself and to the attitude towards nature underlying it, irrespective of the consequences. These issues only come up when the animal is perceived in a holistic way, which comes close to our perception of animals in our daily life.",NJAS - Wageningen Journal of Life Sciences,,"Louis Bolk Institute, Hoofdstraat 24, NL-3972 LA Driebergen, Netherlands","Verhoog, H., Louis Bolk Institute, Hoofdstraat 24, NL-3972 LA Driebergen, Netherlands",Animal welfare; Biocentric view; Extrinsic values; Intrinsic values; Value-freedom of science; Zoocentric view,animal welfare; biology; esthetics; perception; Animalia,Article,Scopus,,R,"Research ethics, bioethics, clinical ethics, or ethical role of universities in society",Unclassified,,,,,,,N/A,,N/A,,,,,,
2-s2.0-34247172543,Al-Qallaf C.L.,"Medical principles and practice, 1989-2003: A bibliometric study of research articles",2007,"The purpose of this study is to examine and analyze the 'original' research articles published in Medical Principles and Practice, provide a profile of its contributors, and determine evolving patterns and trends. The study will also apply several bibliometric principles to ascertain the research activity of the journal. The data set consisted of 331 research articles from the first 12 volumes (1989 to 2003), excluding articles published in supplementary issues. For each article, the average number of references per paper, length and number of keywords per article, research design, primary subject, author characteristics, and citation data were analyzed. The growth pattern of the journal was also examined. For purposes of comparison, the time-span covered was divided into three periods with an equal number of volumes per period. Data were coded and stored in a ProCite database for analysis. The primary subject areas totaled 29, with the majority focusing on microbiology and public health issues. Cross-sectional research designs dominate the publications. Author collaboration is strong (93.7%). Papers with at least one female author account for 60.6%. The majority of authors (77.3%) are Kuwait-based. Individuals affiliated with universities continue to be the most frequent contributors to the journal (65.3%). Age of the cited literature has a Price Index value of 33. The journal is evolving towards a mature publication with scientific integrity. The research behavior of the authors follows accepted scholarly practices. Some recommendations proposed are more journal exposure, standardization authors' names, and the pursuit of more experimental research methodologies.",Journal of the Social Sciences,,"Dept. of Library and Information Science, College of Social Sciences, Kuwait University, Kuwait","Al-Qallaf, C.L., Dept. of Library and Information Science, College of Social Sciences, Kuwait University, Kuwait",Bibliometrics; Kuwait; Medical literature; Scientific journals,data set; experimental study; literature review; medical geography; microbiology; public health; Asia; Eurasia; Kuwait [Middle East]; Middle East,Article,Scopus,,R,"Research ethics, bioethics, clinical ethics, or ethical role of universities in society",Unclassified,,,,,,,N/A,,N/A,,,,,,
2-s2.0-34247340968,[No author name available],SAFIR the finnish research programme on nuclear power plant safety 2003-2006,2006,"Major part of Finnish public research on nuclear power plant safety during the years 2003-2006 has been carried out in the SAFIR programme. The programme has been administrated by the steering group that was nominated by the Ministry of Trade and Industry (KTM). The steering group of SAFIR has consisted of representatives from Radiation and Nuclear Safety Authority (STUK), Ministry of Trade and Industry (KTM), Technical Research Centre of Finland (VTT), Teollisuuden Voima Oy (TVO), Fortum Power and Heat Oy, Fortum Nuclear Services Oy (Fortum), Finnish Funding Agency for Technology and Innovation (Tekes), Helsinki University of Technology (TKK) and Lappeenranta University of Technology (LTY). The key research areas of SAFIR have been 1) reactor fuel and core, 2) reactor circuit and structural safety, 3) containment and process safety functions, that was divided in 2005 into 3a) thermal hydraulics and 3b) severe accidents, 4) automation, control room and IT, 5) organisations and safety management and 6) risk-informed safety management. The research programme has included annually from 20 up to 24 research projects, whose volume has varied from a few person months to several person years. The total volume of the programme during the four year period 2003-2006 has been 19.7 million euros and 148 person years. The research in the programme has been carried out primarily by Technical Research Centre of Finland (VTT). Other research units responsible for the projects include Lappeenranta University of Technology, Fortum Nuclear Services Oy, Helsinki University of Technology and RAMSE Consulting Oy. In addition, there have been a few minor subcontractors in some projects. The programme management structure has consisted of the steering group, a reference group in each of the seven research areas and a number of ad hoc groups in the various research areas. This report gives a short summary of the results of the SAFIR programme for the period January 2003 - November 2006, and highlights of some major achievements. Copyright © VTT 2006.",VTT Tiedotteita - Valtion Teknillinen Tutkimuskeskus,,,,Ageing; Automation; Containment; Control rooms; Fuel elements; High-burnup; Nuclear safety; Organisations; Reactor analysis; Reactor circuit; Reactor components; Reactor core; Risk informed safety management; Severe accidents; Structural safety; Thermal hydraulics,,Article,Scopus,,R,Scope irrelevant,Unclassified,,,,,,,N/A,,N/A,,,,,,
2-s2.0-34247506665,"Agarwal S.K., Estrada S., Foster W.G., Wall L.L., Brown D., Revis E.S., Rodriguez S.",What motivates women to take part in clinical and basic science endometriosis research?,2007,"BACKGROUND: The objective of this study was to identify factors motivating women to take part in endometriosis research and to determine if these factors differ for women participating in clinical versus basic science studies. METHODS: A consecutive series of 24 women volunteering for participation in endometriosis-related research were asked to indicate, in their own words, why they chose to volunteer. In addition, the women were asked to rate, on a scale of 0 to 10, sixteen potentially motivating factors. The information was gathered in the form of an anonymous self-administered questionnaire. RESULTS: Strong motivating factors (mean score >8) included potential benefit to other women's health, improvement to one's own condition, and participation in scientific advancement. Weak motivating factors (mean score <3) included financial compensation, making one's doctor happy, and use of 'natural' products. No difference was detected between clinical and basic science study participants. CONCLUSION: This study is the first study to specifically investigate the factors that motivate women to take part in endometriosis research. Understanding why women choose to take part in such research is important to the integrity of the informed consent process. The factors most strongly motivating women to participate in endometriosis research related to improving personal or public health; the weakest, to financial compensation and pleasing the doctor. © 2007 The Authors.",Bioethics,10.1111/j.1467-8519.2007.00552.x,"Department of Reproductive Medicine, University of California, San Diego, CA, United States; Women's Cancer Research Institute, Samuel Oschin Comprehensive Cancer Institute, Cedars-Sinai Medical Center, United States; CIHR/Ontario Women's Health Council, McMaster University, Canada; Centre for Reproductive Care and Reproductive Biology Division, McMaster University, Canada; Canadian Fertility and Andrology Society, Canada; Department of Obstetrics and Obstetrics, School of Medicine, Washington University, St. Louis, United States; Department of Anthropology, College of Arts and Sciences, Washington University, St. Louis, United States; Barnes-Jewish Hospital Ethics Committee, United States; Ethics Education Subcommittee; Barnes-Jewish Hospital Ethics Program, Washington University Medical Center, St. Louis, United States; Department of Psychology, Case Western Reserve University, Cleveland, OH, United States; Department of Reproductive Medicine, UCSD School of Medicine, Basic Science Building #5040, 9500 Gilman Drive, San Diego, CA 92093-0633, United States","Agarwal, S.K., Department of Reproductive Medicine, University of California, San Diego, CA, United States, Department of Reproductive Medicine, UCSD School of Medicine, Basic Science Building #5040, 9500 Gilman Drive, San Diego, CA 92093-0633, United States; Estrada, S., Women's Cancer Research Institute, Samuel Oschin Comprehensive Cancer Institute, Cedars-Sinai Medical Center, United States; Foster, W.G., CIHR/Ontario Women's Health Council, McMaster University, Canada, Centre for Reproductive Care and Reproductive Biology Division, McMaster University, Canada, Canadian Fertility and Andrology Society, Canada; Wall, L.L., Department of Obstetrics and Obstetrics, School of Medicine, Washington University, St. Louis, United States, Department of Anthropology, College of Arts and Sciences, Washington University, St. Louis, United States, Barnes-Jewish Hospital Ethics Committee, United States, Ethics Education Subcommittee; Brown, D., Barnes-Jewish Hospital Ethics Program, Washington University Medical Center, St. Louis, United States; Revis, E.S.Department of Psychology, Case Western Reserve University, Cleveland, OH, United States; Rodriguez, S.",Endometriosis; Ethics; Motivation; Research,gestagen; gonadorelin; nonsteroid antiinflammatory agent; oral contraceptive agent; adult; article; bioethics; clinical article; clinical research; compensation; endometriosis; female; financial management; human; human characteristic; informed consent; motivation; participant observation; questionnaire; rating scale; scoring system; volunteer; women's health; Adult; Altruism; Endometriosis; Female; Humans; Motivation; Questionnaires; Research Subjects,Article,Scopus,,R,"Research ethics, bioethics, clinical ethics, or ethical role of universities in society",Unclassified,,,,,,,N/A,,N/A,,,,,,
2-s2.0-34247542196,"Munafò M.R., Matheson I.J., Flint J.",Association of the DRD2 gene Taq1A polymorphism and alcoholism: A meta-analysis of case-control studies and evidence of publication bias,2007,"We investigated the association of the dopamine D2 receptor (DRD2) Taq1A polymorphism and alcoholism, using meta-analytic techniques, and specifically undertook an investigation of possible publication bias. Potential publication bias represents a genuine risk to the integrity of published research, but its impact has rarely been documented. We observed a small effect of the DRD2 Taq1A polymorphism on risk of alcoholism, indicating increased alcoholism in individuals possessing the A1 allele of the Taq1A polymorphism (OR=1.21, 95% CI 1.13-1.30, P<0.001). This association remained significant when data from samples of European and East Asian ancestry were analyzed separately. We did not find evidence for association in high-severity alcoholism compared to low-severity alcoholism. Removing the first published study significantly reduced the magnitude of the pooled effect size estimate, although the association remained significant. In addition, we observed evidence for possible publication bias and for the strength of individual study effect size to be inversely related to year of publication. These results support the association of the DRD2 Taq1A polymorphism with alcoholism. This conclusion is qualified by the possibility of publication bias in the literature and the observed between-study heterogeneity, which indicates that the observed association may differ in strength between populations or may not exist at all in some populations. © 2007 Nature Publishing Group All rights reserved.",Molecular Psychiatry,10.1038/sj.mp.4001938,"Department of Experimental Psychology, University of Bristol, Bristol, United Kingdom; Wellcome Trust Centre for Human Genetics, University of Oxford, Oxford, United Kingdom; Department of Experimental Psychology, University of Bristol, 12a Priory Road, Bristol BS8 1TU, United Kingdom","Munafò, M.R., Department of Experimental Psychology, University of Bristol, Bristol, United Kingdom, Department of Experimental Psychology, University of Bristol, 12a Priory Road, Bristol BS8 1TU, United Kingdom; Matheson, I.J., Department of Experimental Psychology, University of Bristol, Bristol, United Kingdom; Flint, J., Wellcome Trust Centre for Human Genetics, University of Oxford, Oxford, United Kingdom",Alcoholism; ANKK1; DRD2; Genetics; Meta-analysis; Publication bias,"dopamine 2 receptor; alcoholism; article; confidence interval; controlled study; disease severity; genetic heterogeneity; genetic polymorphism; human; major clinical study; medical research; priority journal; publishing; risk assessment; Alcoholism; Case-Control Studies; Female; Genetic Predisposition to Disease; Humans; Male; Publication Bias; Receptors, Dopamine D2",Article,Scopus,,R,Scope irrelevant,Unclassified,,,,,,,N/A,,N/A,,,,,,
2-s2.0-34247846383,Gershen B.J.,Caveat lector.,2007,[No abstract available],"Maryland medicine : MM : a publication of MEDCHI, the Maryland State Medical Society",,,"Gershen, B.J.",,"article; Canada; conflict of interest; economics; ethics; evidence based medicine; financial management; health care cost; human; medical society; politics; publication; publishing; scientific misconduct; standard; trust; United States; Canada; Conflict of Interest; Evidence-Based Medicine; Health Care Sector; Humans; Journalism, Medical; Periodicals; Politics; Publishing; Research Support; Scientific Misconduct; Societies, Medical; Trust; United States",Article,Scopus,English,R,Accessibility and language,Unclassified,,,,,,,N/A,,N/A,,,,,,
2-s2.0-34248161476,Hantos P.,Defense acquisition performance assessment - The life-cycle perspective of selected recommendations,2007,"As a significant milestone in the Department of Defense's (DoD) continuons self-assessment process, an important document, the Defense Acquisition Performance Assessment (DAPA) report, was released in early 2006. The report - in its sweeping and integrated assessment - attempted to consider all critical aspects of defense acquisition and made recommendations for each of the major elements of the Defense Acquisition System (DAS). The author's goal in this article is to analyse the conceptual integrity of selected recommendations, using an approach that has been refined during the author's life cycle modeling research. Here, conceptual integrity refers to potential contradictions between the recommended actions that, when viewed independently from each other, appear to be viable. Why the life-cycle modeling focus? Life-cycle models represent the backbone of both acquisition and development processes, and this focus facilitates the analysis of concerns that crosscut in the impacted domains.",CrossTalk,,"Aerospace Corporation, United States; Aerospace Corporation, P.O. Box 92957 - M1/112, El Segundo, CA 90009-2957, United States","Hantos, P., Aerospace Corporation, United States, Aerospace Corporation, P.O. Box 92957 - M1/112, El Segundo, CA 90009-2957, United States",,Defense Acquisition Performance Assessment (DAPA); Department of Defense (DoD); Performance assessment; Life cycle; Mathematical models; Military applications,Article,Scopus,,R,Scope irrelevant,Unclassified,,,,,,,N/A,,N/A,,,,,,
2-s2.0-34248373840,"Molnar M.J., Bencsik P.","Establishing a Neurological-Psychiatric Biobank: Banking, informatics, ethics",2006,"The recent development of genetic databases and biobanks in a number of countries reflects scientist's beliefs in the future health benefits to be derived from genetic research. The NEPSYBANK is a national program of the Hungarian Clinical Neurogenetic Society with comprehensive participation of the Neurology and Psychiatry Departments of Medical Universities and the National Institute of Psychiatry and Neurology. The NEPSYBANK forms a part of the national biobank project (www.biobank.hu). The goal is to establish nationwide collaboration and common biobanking standards on quality, access, and protection of integrity in the field of neurology and psychiatry. Biological materials and databases are already collected in stroke, epilepsy, multiple sclerosis, motoneuron diseases, dementia, movement disorders, schizophrenia, and alcohol addiction. In peripheral neuropathies, neuropathic pain syndromes, muscle diseases, migraine, myasthenia gravis, depression, panic disease, anxiety, autism, and software development is in progress. The resources have been expanded by continued prospective collection of samples and data and important bottlenecks in sample purification, sample retrieval, in protection of the integrity of the research participants, as well as in guaranteeing the security and confidentiality of the participant's information have been harmonized. The development of uniform consent management, comprehensive sample overview and quality standards for health care-related biobanking may provide a unique opportunity for Hungary in molecular clinically oriented research. The program is a diseased-based research biobank with comprehensive collection of phenotypic and environmental information as well as biobanking of DNA, RNA or buffy coat, plasma, and erythrocytes stored at -80 °C. The biobank has a neuropathological part as well: storing conventional pathology and biopsy specimens. The analytical and informational demands being created by biobanking requires a ""connectivity of community"" that has not traditionally been present in the life sciences. As you put more resources into something, your silos tend to become taller, and we need to avoid this. The life science and healthcare community should be ignored working in individual ""silos."". © 2007 Elsevier Inc. All rights reserved.",Cellular Immunology,10.1016/j.cellimm.2007.02.013,"National Institute of Psychiatry and Neurology, Hüvösvölgyi Str. 116, 1021 Budapest, Hungary; I. Department of Pediatrics, Semmelweis University, Budapest, Hungary","Molnar, M.J., National Institute of Psychiatry and Neurology, Hüvösvölgyi Str. 116, 1021 Budapest, Hungary; Bencsik, P., I. Department of Pediatrics, Semmelweis University, Budapest, Hungary",Biobanking; Database; Neurology; Psychiatry,"article; biobank; bioinformatics; ethics; genetic database; human; information processing; mental disease; nepsybank; neurologic disease; neurology; priority journal; psychiatry; Databases, Factual; Female; Genome, Human; Humans; Hungary; Male; Nervous System Diseases; Tissue Banks",Article,Scopus,,R,"Research ethics, bioethics, clinical ethics, or ethical role of universities in society",Unclassified,,,,,,,N/A,,N/A,,,,,,
2-s2.0-34249047099,Schulz W.G.,Giving proper credit,2007,"The investigations by the Stockholm University, Sweden, which sanctioned an associate professor of chemistry, Armando Córdova for research misconducts, has raised the issue of science's unpreparedness to tackle ethical violations. The investigation clearly showed that Córdova violated the scientific norms a number of times to facilitate the publishing of research results in the growing field of organocatalysis. It is said that scientists do not get adequate training of ethics and they learn by watching their observers. However, there has been a demand from researcher's side for some formal ethics course work. The Córdova's case clearly mentions the ignorance of ethical norms by the scientific community. The scientists, therefore, should come out of their shells, realizing that protection of scientific knowledge requires a community participation.",Chemical and Engineering News,,"C and EN Washington, United States","Schulz, W.G., C and EN Washington, United States",,,Article,Scopus,,R,Article format or year,Unclassified,,,,,,,N/A,,N/A,,,,,,
2-s2.0-34249736308,Bombaro C.,"Using audience response technology to teach academic integrity: ""The seven deadly sins of plagiarism"" at Dickinson College",2007,"Purpose - This paper seeks to explore the successes and challenges associated with teaching first-year students a session on plagiarism avoidance through the use of an audience response system. Design/methodology/approach - An audience response system was used to test first-year students' knowledge of plagiarism. Quiz questions about academic honesty and plagiarism were administered, and were answered anonymously with hand-held remote control devices. The reporting feature of the technology was used to gather results of the answers to these questions, which will be used to improve the session in future years. Findings - Data gathered from the sessions indicated that this session helped students retain knowledge of plagiarism rules. Comments solicited about the session indicated that the students enjoyed the lesson, that they were better able to recognize problem areas in their own writing, and that the interactivity kept them focused on the lesson. Research limitations/implications - The session will have to be repeated over a number of years to determine whether there is a link between it and the number of plagiarism incidents on campus. Practical implications - This paper provides a practical and relatively inexpensive approach for teaching academic integrity to large groups of students. An undertaking of this magnitude requires dedicated involvement from an institution's administration. Any correlation between the session and the number of plagiarism cases may never be able to be proved conclusively. Originality/value - Audience response technology is not yet widely used in small academic libraries. This paper offers a suggestion for implementing this technology to teach academic integrity in a consistent and effective way to large groups of first-year undergraduate students.",Reference Services Review,10.1108/00907320710749209,"Waidner-Spahr Library, Dickinson College, Carlisle, PA, United States","Bombaro, C., Waidner-Spahr Library, Dickinson College, Carlisle, PA, United States",Authorship; Dishonesty; Students,,Article,Scopus,,R,Cheating (exclusively),Unclassified,,,,,,,N/A,,N/A,,,,,,
2-s2.0-34249743815,Dyer C.,UK must learn from US's mistakes in tackling research misconduct.,2007,[No abstract available],BMJ (Clinical research ed.),,,"Dyer, C.",,article; legal aspect; medical research; scientific misconduct; United Kingdom; United States; Biomedical Research; Great Britain; Scientific Misconduct; United States,Article,Scopus,,R,Article format or year,Unclassified,,,,,,,N/A,,N/A,,,,,,
2-s2.0-34249747797,Hall Z.W.,California dreaming? A new start for regenerative medicine in the Golden State,2007,"The California Institute for Regenerative Medicine (CIRM) was established in 2004 with the passage of Proposition 71, the California Stem Cell Research and Cures Initiative. The statewide ballot measure, which provided US$3 billion in funding for stem cell research at California universities and research institutions, was approved by California voters, and called for the establishment of an entity to make grants and provide loans for stem cell research, research facilities and other vital research opportunities. Here, Dr Zach Hall, Interim President of the CIRM, outlines the ethos and aspirations of the CIRM to Regenerative Medicine. Dr Hall trained as a basic neuroscientist and became a faculty member and department chair at the University of California, San francisco. In 1994, he was appointed Director of National Institute of Neurological Disodiers and Stroke within the National Institutes of Health, and was responsible for a research program that awarded more than US$500 million a year in grants and contracts. Since that time, he has held senior positions in research administration within both the University of California, San Francisco, where he was Executive Vice Chancellor, and the University of Southern California. Full information about the CIRM can be found at www.cirm.ca.gov. © 2007 Future Medicine Ltd.",Regenerative Medicine,10.2217/17460751.2.1.25,"California Institute for Regenerative Medicine, 210 King Street, San Francisco, CA 94107, United States","Hall, Z.W., California Institute for Regenerative Medicine, 210 King Street, San Francisco, CA 94107, United States",,article; cell nucleus transplantation; clinical research; embryonic stem cell; funding; goal attainment; government regulation; law suit; legal aspect; patent; policy; priority journal; regenerative medicine; stem cell transplantation; strategic planning; United States; California; Embryonic Stem Cells; Federal Government; Humans; National Institutes of Health (U.S.); Regenerative Medicine; Stem Cell Transplantation; United States,Article,Scopus,,R,Scope irrelevant,Unclassified,,,,,,,N/A,,N/A,,,,,,
2-s2.0-34249783425,Ata M.,From responsible research and development to innovation in nanotechnology,2007,The research and development in science and technology has led to a technological development called as nanotechnology. The US government has allocated 10% of the nanotechnology budget to the research regarding societal implications. The government has emphasized on return of research and development investments that is reflected in the systemization of functions in Woodrow Wilson International Center for Scholars (WWICS) for research of public acceptance of emerging technologies. The British government has established an inter-ministry collaborative system for research and policy formulation regarding the societal implication of nanotechnology. Japan's leading research institutes have carried out on Research Project on Facilitation Public Acceptance of Nanotechnology. AIST has also launched projects for risk management of nanoparticles and standardization of nanotechnology.,AIST Today (International Edition),,Technology Information Department,"Ata, M., Technology Information Department",,Innovation; Nanoparticles; Project management; Public policy; Research and development management; Standardization; Inter-ministry collaborative system; Societal implication; Technological development; Nanotechnology,Article,Scopus,,R,Scope irrelevant,Unclassified,,,,,,,N/A,,N/A,,,,,,
2-s2.0-34249803303,Watts G.,Croatian academic is found guilty of plagiarism.,2007,[No abstract available],BMJ (Clinical research ed.),,,"Watts, G.",,article; Croatia; legal aspect; publishing; scientific misconduct; Croatia; Plagiarism; Scientific Misconduct,Article,Scopus,English,R,Article format or year,Unclassified,,,,,,,N/A,,N/A,,,,,,
2-s2.0-34249890768,"Li S., Wu Z.",Development of distributed long-gage fiber optic sensing system for structural health monitoring,2007,"The essence of structural health monitoring (SHM) requires an innovative sensing system similar to a human nervous system throughout the whole body to catch comprehensive information without losing structural integrity. In a recent research by the authors, an integrated structural assessment strategy based on distributed strain sensing technologies is proposed [1], which has been dedicated to utilize the strain distribution throughout the full or some partial areas of structures to detect the arbitrary and unforeseen damage. To implement such strategy, a typical distributed fiber optic sensing system is developed by extending the gage length of fiber Bragg grating (FBG) and then arranging the long-gage FBG sensors in series. This article summarizes the packaging design and manufacture method of such long-gage FBG sensors and verifies the performance of the developed sensors and the distributed sensing system by using a series connection of long-gage FBG sensors. Combined with the practical application in steel and reinforced concrete (RC) structures, the efficiency and ascendancy of the proposed distributed fiber optic sensing system in SHM are elaborated.",Structural Health Monitoring,10.1177/1475921706072078,"Department of Urban and Civil Engineering, Ibaraki University, Nakanarusawa-cho 4-12-1, Hitachi 316-8511, Japan","Li, S., Department of Urban and Civil Engineering, Ibaraki University, Nakanarusawa-cho 4-12-1, Hitachi 316-8511, Japan; Wu, Z., Department of Urban and Civil Engineering, Ibaraki University, Nakanarusawa-cho 4-12-1, Hitachi 316-8511, Japan",Damage identification; Distributed sensing; Long-gage fiber optic sensor; Structural performance verification,,Article,Scopus,,R,Scope irrelevant,Unclassified,,,,,,,N/A,,N/A,,,,,,
2-s2.0-34249979464,"Karren R.J., Zacharias L.",Integrity tests: Critical issues,2007,"This paper reviews the issues related to the use of overt integrity tests as a pre-employment screening technique. We offer a critical examination of the research on integrity testing; and we come to the conclusion that there are serious consequences to the application of these tests. First, the tests raise validity issues on what these tests actually measure. Second, the tests seem to lead to bad consequences such as the high percentage of false positives. Third, there is a body of literature on faking, coaching, and retaking tests which should result in lower criterion-related validities and an increase in decision errors. Finally there is a discussion on fairness and privacy concerns. © 2007 Elsevier Inc. All rights reserved.",Human Resource Management Review,10.1016/j.hrmr.2007.03.007,"University of Massachusetts, United States","Karren, R.J., University of Massachusetts, United States; Zacharias, L., University of Massachusetts, United States",Privacy; Selection tests; validity,,Article,Scopus,,R,"Research ethics, bioethics, clinical ethics, or ethical role of universities in society",Unclassified,,,,,,,N/A,,N/A,,,,,,
2-s2.0-34250022209,"Kobayashi T., Nakamori Y., Wierzbicki A.P.",Management of technology in academic research,2007,"This chapter describes the concept of management of technology (MOT) and the attempts to apply this concept in academic research, to support research and education in the university laboratories at the Japan Advanced Institute of Science and Technology (JAIST). The concept of MOT became popular in European countries and the United States starting in the 1980s, and has made rapid strides in Japan since 2002. MOT can have diverse definitions, but here we examine it as an education programme aimed at enhancing the management abilities of technologists responsible for research and development in corporations; such a programme is usually taught at graduate schools in the management and engineering areas. These MOT courses and programmes are mainly targeted at corporate employees, and their primary mission, as recognised by faculty members in charge of them, is to respond to the needs of research and development divisions in profit-making organisations. © 2007 Springer-Verlag Berlin Heidelberg.",Studies in Computational Intelligence,10.1007/978-3-540-71562-7_14,"Center for Strategic Development of Science and Technology, Japan advanced Institute of Science and Technology, 1-1 Asahidai, Nomi, Ishikawa 923-1292, Japan; School of Knowledge Science, Japan Advanced Institute of Science and Technology, 1-1 Asahidai, Nomi, Ishikawa 923-1292, Japan","Kobayashi, T., Center for Strategic Development of Science and Technology, Japan advanced Institute of Science and Technology, 1-1 Asahidai, Nomi, Ishikawa 923-1292, Japan; Nakamori, Y., School of Knowledge Science, Japan Advanced Institute of Science and Technology, 1-1 Asahidai, Nomi, Ishikawa 923-1292, Japan; Wierzbicki, A.P., Center for Strategic Development of Science and Technology, Japan advanced Institute of Science and Technology, 1-1 Asahidai, Nomi, Ishikawa 923-1292, Japan",,,Article,Scopus,,R,Scope irrelevant,Unclassified,,,,,,,N/A,,N/A,,,,,,
2-s2.0-34250155984,"Guo Y., Satpathy M., Wilson G., Srinivas S.P.",Benzalkonium chloride induces dephosphorylation of myosin light chain in cultured corneal epithelial cells,2007,"PURPOSE. Phosphorylation of myosin light chain (MLC) is essential for the contractility of the actin cytoskeleton, which regulates barrier integrity, adhesion, and migration. This study was conducted to investigate the effect of benzalkonium chloride (BAK), a preservative in topical ophthalmic formulations, on MLC phosphorylation in primary cultures of bovine corneal epithelial cells (BCECs). METHODS. MLC phosphorylation was assessed by urea-glycerol gel electrophoresis followed by Western blot analysis. Activation of RhoA, which inhibits MLC phosphatase through Rho kinase, was examined by immunoprecipitation. The release of adenosine triphosphate (ATP) was measured by the luciferase-luciferin bioluminescence technique. RESULTS. Positive expression of MLC kinase (MLCK) was found at the mRNA and protein levels by RT-PCR and Western blot analysis, respectively. Exposure to BAK for 10 to 20 minutes at concentrations of 0.0005%, 0.001%, and 0.003% reduced MLC phosphorylation by more than 30%. In addition, BAK led to thinning of the cortical actin and a decrease in cell adhesion. However, RhoA activity was found to increase with BAK treatment. Similar to BAK, ATP-depletion (induced by both antimycin-A and hypoxia) led to MLC dephosphorylation. BAK exposure also showed acute ATP release. CONCLUSIONS. BAK induces acute ATP release and concomitant MLC dephosphorylation in bovine corneal epithelial cells. The dephosphorylation, presumably due to ATP loss, is indicative of a loss of contractility of the actin cytoskeleton that could affect cellular functions contributing to the maintenance of epithelial barrier integrity. Copyright © Association for Research in Vision and Ophthalmology.",Investigative Ophthalmology and Visual Science,10.1167/iovs.06-0613,"School of Optometry, Indiana University, Bloomington, IN, United States; Indiana University, School of Optometry, 800 East Atwater Avenue, Bloomington, IN 47405, United States","Guo, Y., School of Optometry, Indiana University, Bloomington, IN, United States; Satpathy, M., School of Optometry, Indiana University, Bloomington, IN, United States; Wilson, G., School of Optometry, Indiana University, Bloomington, IN, United States; Srinivas, S.P., School of Optometry, Indiana University, Bloomington, IN, United States, Indiana University, School of Optometry, 800 East Atwater Avenue, Bloomington, IN 47405, United States",,"adenosine triphosphate; benzalkonium chloride; myosin light chain; RhoA guanine nucleotide binding protein; actin; adenosine triphosphate; antiinfective agent; benzalkonium; messenger RNA; myosin light chain; myosin light chain kinase; preservative; rhodopsin kinase; actin filament; animal cell; animal tissue; article; bioluminescence; cell adhesion; cell culture; controlled study; cornea epithelium; enzyme activation; enzyme activity; epithelium cell; immunoprecipitation; nonhuman; priority journal; protein dephosphorylation; protein expression; protein phosphorylation; reverse transcription polymerase chain reaction; Western blotting; animal; cattle; cell survival; drug effect; enzyme linked immunosorbent assay; genetics; metabolism; phosphorylation; Actins; Adenosine Triphosphate; Animals; Anti-Infective Agents; Benzalkonium Compounds; Blotting, Western; Cattle; Cell Adhesion; Cell Survival; Cells, Cultured; Enzyme-Linked Immunosorbent Assay; Epithelium, Corneal; Myosin Light Chains; Myosin-Light-Chain Kinase; Phosphorylation; Preservatives, Pharmaceutical; Reverse Transcriptase Polymerase Chain Reaction; Rhodopsin Kinase; RNA, Messenger",Article,Scopus,,R,Scope irrelevant,Unclassified,,,,,,,N/A,,N/A,,,,,,
2-s2.0-34250177266,Tyler J.,Pioneers of acoustics: Harry F Olson (1901-1982),2007,"Harry F Olson, born in Mount Pleasant, Iowa, was recognized as a pioneer and leading authority in acoustics and electronic sound recording. In 1928, he joined the Radio Corporation of America (RCA) and became responsible for acoustical research. Olson won more than 100 patents for the various types of acoustical equipments and received many honors for his achievements. He also received medal awards from the Acoustical Society of America and the Society in 1974 and 1981, respectively. In 1953/54, he became President of the Society and also a member of the American Society of Motion Picture and Television Engineers, a Fellow of the American physical Society and a Fellow of the Institute of Electrical and Electronic Engineers. Among his many notable developments are microphones, loudspeakers, direct radiator loudspeaker enclosures, magnetic tape recording, music synthesizers and video players.",Acoustics Bulletin,,,"Tyler, J.",,Acoustic equipment; Audio acoustics; Audio equipment; Loudspeakers; Magnetic recording; Electronic sound recording; Magnetic tape recording; Music synthesizers; Video players; Sound recording,Article,Scopus,,R,Scope irrelevant,Unclassified,,,,,,,N/A,,N/A,,,,,,
2-s2.0-34250202511,"López-Cózar E.D., Salinas D.T., López Á.R.",Fraud in science: Reflections on the Hwang affair [El fraude en la ciencia: Reflexiones a partir del caso Hwang],2007,"In 2006 Hwang's fraudulent papers published in Science on stem cell research re-opened the debate on scientific misconduct. Taking this as a starting point, some reflections are put forward on the dimension of fraud in science. The singularity of Hwang's case, due to its scientific, social and media impact, is examined as a consequence of the persuasion mechanisms systematised in the so-called Routes of Scholarly Lying. Furthermore, the reasons for publishing fraudulent research, the inefficiency of peer review for detecting it, and the various mechanisms for managing and eradicating it, are presented.",Profesional de la Informacion,10.3145/epi.2007.mar.07,"Deportamento de Biblioteconomía y Documentación, Universidad de Granada, Spain; Centro Para la Investigación Médica Aplicada, Universidad de Navarra, Spain; Instituto de Salud Carlos III, Spain","López-Cózar, E.D., Deportamento de Biblioteconomía y Documentación, Universidad de Granada, Spain; Salinas, D.T., Centro Para la Investigación Médica Aplicada, Universidad de Navarra, Spain; López, Á.R., Instituto de Salud Carlos III, Spain",Ethics; Hwang affair; Peer review; Scholarly publishing; Science; Scientific fraud; Scientific misconduct,,Article,Scopus,Spanish,R,Accessibility and language,Unclassified,,,,,,,N/A,,N/A,,,,,,
2-s2.0-34250217123,Lyubarsky G.Yu.,Classical taxomomies,2006,"The sequence of classic paradigms in taxonomy that partly replaced each other and partly co-exist is given as follows: the theory of ""organ and organism similarity"", the naturalistic theory, the descriptive theory, and the phylogenetic theory. The naturalistic classics accepted the notion of ""the plan of creation"". The rejection of appealing to this plan brought forth certain problems in the formulation of the purpose of taxonomy; these problems were differently solved by the descriptive and the phylogenetic classic traditions. The difficulties of the current paradigms arising from the loss of a ""strong purpose"", a problem to be solved by taxonomists that is to be clear and interesting to a wide range of non-professionals. The paradox of formalization led to the losing of content of the methods due to their formalization. To attract attention to taxonomy, a new ""image of the results"" of its work that would be interesting to the non-professionals is necessary. The co-existence of different methods of reseach applied to different groups of facts leads to the loss of integrity of the research. It is not only that the taxon becomes a hypothesis and such hypotheses multiply. The comparison of these hypotheses is problematic, because each of them is supported by its own independent scope of facts. Because of the existence of a fundamental meronotaxonomic discrepancy, taxonomic systems based on different groups of characters appear to be incomparable, being rather systems of characters than systems of taxa. Systems of characters are not directly comparable with each other; they can be compared only through appealing to taxa, but taxa themselves exist only in the form of a number of hypotheses. Consequently, each separate taxonomic approach creates its own nature, its own subject of research. Therefore, it is necessary to describe the subject of research correctly (and indicate the purpose of research), as well as to distinguish clearly between results achieved through different systems of characters. The diversity of current ""classic"" approaches calls for a unification within the frame of a more general theory. The development of such a theory can be achieved through the formulaiton of a substantial theory of organization that would reflect the formal unity of a taxon, i.e., a theory of meron organization that woud hepl establish the relationship of taxonomic systems developed for different merons.",Zhurnal Obshchei Biologii,,"Zoological Museum of Moscow, Lomonosov State University, ul. Bolshaya Nikitskaya, 6, 125009 Moscow, Russian Federation","Lyubarsky, G.Yu., Zoological Museum of Moscow, Lomonosov State University, ul. Bolshaya Nikitskaya, 6, 125009 Moscow, Russian Federation",,,Article,Scopus,,R,Scope irrelevant,Unclassified,,,,,,,N/A,,N/A,,,,,,
2-s2.0-34250891552,De Janasz S.C.,"Honoring the life and legacy of Michael J. Driver, 1936-2004",2007,"Purpose - This special issue honors the life and legacy of Michael J. Driver, a renowned scholar whose contributions to research on careers, decision-making, and cognitive style made an indelible impact on these fields. His often-groundbreaking work spanning more than 40 years impacted the lives of those whom he taught, mentored, consulted and collaborated with. Dr Driver's impact continues to be felt, as can be seen in the pages of this special issue, which highlights the Driver-inspired research of several former students who later became colleagues. Design/methodology/approach - Over the last four decades, Mike Driver has helped shape the way we think about and research careers and career-related issues. To illustrate some of this impact, we provide a first broad retrospective of his life and career and then four articles - written by former students and colleagues of his - that build on Mike's work in careers, decision making and cognitive style. Reflecting on this collection allows the reader to take stock of Driver's research that is responsible for shaping some of the careers research that continues now and in the future. Findings - As it would take several special issues to cover the breadth and depth of Mike's scholarly contributions, this collection of five articles is intended to showcase a sampling of Dr Driver's legacy. The articles - representing such fields as leadership, careers, entrepreneurship, and work-family conflict - demonstrate the reach of Driver's work while providing new insights and offering new avenues for research and practice. Originality/value - These articles are authored by individuals ranging from junior faculty to senior faculty, scholar to practitioner, and colleague to wife. Individually, each article contributes to our understanding of the many fields Driver's work influences. Together, this collection of articles provides important insights that it is hoped encourage even further research that informs career scholarship and its impact on the development of individuals and their careers within and beyond national boundaries. © Emerald Group Publishing Limited.",Career Development International,10.1108/13620430710756726,"College of Graduate and Professional Studies, University of Mary Washington, Fredericksburg, VA, United States","De Janasz, S.C., College of Graduate and Professional Studies, University of Mary Washington, Fredericksburg, VA, United States",Careers; Entrepreneurialism; Leadership; Simulation,,Article,Scopus,,R,Scope irrelevant,Unclassified,,,,,,,N/A,,N/A,,,,,,
2-s2.0-34347364787,"Fleming Jr. A.J., Smith Jr. S.P., Paul C.M., Hall N.C., Daly B.T., Agrawal A., Schuller D.E.",Impact of [18F]-2-fluorodeoxyglucose-positron emission tomography/computed tomography on previously untreated head and neck cancer patients,2007,"OBJECTIVES: The role of fused modality [F]-2-fluorodeoxyglucose-positron emission tomography/computed tomography (PET/CT) in diagnosing and accurately staging patients with primary, metastatic, and recurrent head and neck (HN) cancer is evolving, and the clinical implications need to be further defined. A few retrospective studies have been performed, but adequate sample sizes are lacking because the number of HN cancer patients is relatively small. This study evaluates the positive predictive value (PPV), sensitivity, specificity, and accuracy of PET/CT in previously untreated HN cancer patients at a single tertiary care institution. The purpose of this study is to evaluate the role of this new technology in the management of previously untreated HN cancer patients. STUDY DESIGN: Retrospective cohort outcomes study at a tertiary National Cancer Institute Comprehensive Cancer Center. MATERIALS AND METHODS: Institutional review board exemption #4 (45 CFR 46.101 [4]) criteria were applied for and accepted by the office of responsible research practices at the Ohio State University College of Medicine. The authors identified 268 consecutive PET/CT examinations between March 2005 and January 2006 for HN cancer ordered by the two senior authors at the James Cancer Hospital and Solove Research Institute of the Ohio State University Medical Center. PET/CT examinations were interpreted by one of three neuroradiologists. PPV, sensitivity, specificity, accuracy, diagnostic upstaging, and treatment management changes were determined from subset analysis of 123 previously untreated patients with HN cancer. Synchronous lesions were detected in 10 patients with use of this modality. PET/CT was also used to help manage 22 patients with unknown primary HN cancer. The statistics were verified by comparing PET/CT results with surgical specimen histopathology. RESULTS: PET/CT was true-positive in 82.9% (102/123), with a per patient PPV of 87.2% and a per lesion PPV of 89.4%. PET/CT was false-positive in 12.2% (15/123) of patients and had a false-positive rate of 8.3% when calculated per lesion. In 67 patients who underwent neck dissection, PET/CT had a PPV of 92.7%. The accuracy was 89.7% in 20 patients who had bilateral neck dissections. The unknown primary site was found in 72.7% (16/22) of patients with unknown primary HN cancer. Synchronous lesions were found in 8.1% of patients by PET/CT, with a PPV of 66.6%. Distant metastases were detected in 15.4% (19/123) of patients. Treatment was altered in 30.9% (38/123) of patients as a result of this imaging modality. CONCLUSIONS: The benefit of the PET/CT imaging modality resides in its fusion of anatomic detail of the HN region with the sensitivity of detecting tumors with increased metabolic activity at distant sites. Treatment was altered in 30.9% of our previously untreated HN cancer patients because of this imaging technique, with altered treatment including upstaging, diagnosing distant and unresectable disease, and working-up second primary malignancies. The false-positive findings did not result in additional morbidity to these patients. Although PET/CT is sensitive in detecting occult cervical nodal metastases, it does not yet have the ability to replace neck dissection as the diagnostic standard of care. This study supports the use of PET/CT in patients with newly diagnosed HN cancer because of its high PPV and superiority of detecting distant metastases and synchronous lesions. © The American Laryngological, Rhinological & Otological Society, Inc.",Laryngoscope,10.1097/MLG.0b013e31805d017b,"Department of Otolaryngology - Head and Neck Surgery, Ohio State University Medical Center, Columbus, OH, United States; Department of General Surgery, Ohio State University Medical Center, Columbus, OH, United States; Department of Radiology, Ohio State University Medical Center, Columbus, OH, United States; Department of Otolaryngology - Head and Neck Surgery, Ohio State University Medical Center, 456 W. 10th Avenue, Columbus OH 43210, United States","Fleming Jr., A.J., Department of Otolaryngology - Head and Neck Surgery, Ohio State University Medical Center, Columbus, OH, United States, Department of Otolaryngology - Head and Neck Surgery, Ohio State University Medical Center, 456 W. 10th Avenue, Columbus OH 43210, United States; Smith Jr., S.P., Department of Otolaryngology - Head and Neck Surgery, Ohio State University Medical Center, Columbus, OH, United States; Paul, C.M., Department of General Surgery, Ohio State University Medical Center, Columbus, OH, United States; Hall, N.C., Department of Radiology, Ohio State University Medical Center, Columbus, OH, United States; Daly, B.T., Department of Otolaryngology - Head and Neck Surgery, Ohio State University Medical Center, Columbus, OH, United States; Agrawal, A., Department of Otolaryngology - Head and Neck Surgery, Ohio State University Medical Center, Columbus, OH, United States; Schuller, D.E., Department of Otolaryngology - Head and Neck Surgery, Ohio State University Medical Center, Columbus, OH, United States",Computed tomography; Head and neck cancer; Positron emission tomography; Previously untreated patients,"fluorodeoxyglucose f 18; diagnostic agent; fluorodeoxyglucose f 18; radiopharmaceutical agent; adult; aged; article; cancer patient; cancer staging; computer assisted tomography; controlled study; diagnostic value; female; head and neck cancer; histopathology; human; major clinical study; male; metastasis; neck dissection; positron emission tomography; priority journal; retrospective study; sample size; sensitivity and specificity; statistical analysis; cohort analysis; cost benefit analysis; disease free survival; economics; head and neck tumor; intravenous drug administration; middle aged; mortality; nuclear magnetic resonance imaging; radiography; scintiscanning; Adult; Aged; Aged, 80 and over; Cohort Studies; Cost-Benefit Analysis; Disease-Free Survival; Female; Fluorodeoxyglucose F18; Head and Neck Neoplasms; Humans; Infusions, Intravenous; Magnetic Resonance Imaging; Male; Middle Aged; Positron-Emission Tomography; Radiopharmaceuticals; Retrospective Studies; Sensitivity and Specificity; Tomography, X-Ray Computed",Article,Scopus,,R,Scope irrelevant,Unclassified,,,,,,,N/A,,N/A,,,,,,
2-s2.0-34447292138,Sugarman J.,Ethics and Stem Cell Therapeutics for Cardiovascular Disease,2007,"As research on stem cell therapeutics for the treatment of cardiovascular diseases in adults is being planned and conducted it is essential to address the ethical issues associated with it. The considerable attention that is currently focused on the ethical issues associated with stem cell research as well as the acute clinical situations sometimes encountered when treating cardiovascular disease, underscore the need for explicit attention to the ethical aspects of this research. In this article, I survey some of the key ethical considerations regarding research involving stem cell therapeutics for cardiovascular diseases including: (1) the standard ethical considerations for translational and clinical research and mechanisms of ethical oversight of them; (2) additional oversight related to stem cell research; (3) considerations for obtaining informed consent for this research and in selecting individual human subjects to participate in it; (4) concerns related to justice that may manifest themselves with respect to which research endeavors move forward and (5) conflicts of interest in research and their potential relationship to research integrity. © 2007 Elsevier Inc. All rights reserved.",Progress in Cardiovascular Diseases,10.1016/j.pcad.2007.02.003,"Department of Medicine, Berman Institute of Bioethics, Johns Hopkins University, Baltimore, MD, United States; Department of Health Policy and Management, Johns Hopkins University, Baltimore, MD, United States","Sugarman, J., Department of Medicine, Berman Institute of Bioethics, Johns Hopkins University, Baltimore, MD, United States, Department of Health Policy and Management, Johns Hopkins University, Baltimore, MD, United States",,"article; cardiovascular disease; clinical research; conflict of interest; human; informed consent; justice; medical ethics; patient selection; research ethics; stem cell transplantation; Biomedical Research; Cardiovascular Diseases; Conflict of Interest; Ethics Committees; Ethics, Research; Guidelines; Human Experimentation; Humans; Informed Consent; Morals; Patient Selection; Peer Review, Research; Social Justice; Stem Cell Transplantation",Article,Scopus,,R,"Research ethics, bioethics, clinical ethics, or ethical role of universities in society",Unclassified,,,,,,,N/A,,N/A,,,,,,
2-s2.0-34547094551,Trulson C.R.,Determinants of disruption: Institutional misconduct among state-committed delinquents,2007,"With a few exceptions, most of the empirical research on institutional misconduct has focused on adult prison inmates. As a result, little is known about the factors related to misconduct among state-committed delinquents. This article examined the institutional misconduct of 4,684 state-committed delinquents released from a large Southern juvenile correctional system. Males, non-Whites, gang members and/or those with gang-related family members, and those with earlier, more serious, and more extensive delinquent histories were significantly more likely to engage in serious forms of institutional misconduct. These predictors were consistent for the model examining a less serious but disruptive form of institutional misconduct, with the exception that race, sex, and gang membership failed to be significant. The analyses also indicate that the determinants of misconduct for males may differ for state-committed females. This article concludes with suggestions for future research on institutional misconduct involving state-committed delinquents. © 2007 Sage Publications.",Youth Violence and Juvenile Justice,10.1177/1541204006295162,"Department of Criminal Justice, University of North Texas, Denton, TX, United States","Trulson, C.R., Department of Criminal Justice, University of North Texas, Denton, TX, United States",Deprivation; Importation; Incarcerated delinquents; Institutional misconduct; Institutional violence,,Article,Scopus,,R,Scope irrelevant,Unclassified,,,,,,,N/A,,N/A,,,,,,
2-s2.0-34547229868,"Kiracofe N.M., Wells L.",Mandated disciplinary counseling on campus: Problems and possibilities,2007,"Because of increased student misconduct in academic institutions, counselors have had to use traditional voluntary counseling models with involuntary disciplinary clients. The authors propose a policy position that would preclude mandated treatment and instead place an emphasis on counseling readiness programming for disciplinary referrals. A stages of behavioral change model is offered as a tool to articulate when counseling can be effective with students entangled in disciplinary procedures. © 2007 by the American Counseling Association. All rights reserved.",Journal of Counseling and Development,,"Department of Counselor Education and Counseling Psychology, Western Michigan University, United States; Department of Counselor Education and Counseling Psychology, 3102 Sangren Hall, Western Michigan University, Kalamazoo, MI 49008-5226, United States","Kiracofe, N.M., Department of Counselor Education and Counseling Psychology, Western Michigan University, United States, Department of Counselor Education and Counseling Psychology, 3102 Sangren Hall, Western Michigan University, Kalamazoo, MI 49008-5226, United States; Wells, L., Department of Counselor Education and Counseling Psychology, Western Michigan University, United States",,,Article,Scopus,,R,Cheating (exclusively),Unclassified,,,,,,,N/A,,N/A,,,,,,
2-s2.0-34547259694,"Wang Y.-C., Huang Z.-G.",Research on receiver autonomous integrity monitoring augmented with improved clock bias model,2007,"The paper presents an improved receiver clock bias forecast model. The model built with 'coasting window' method, holds the real-time refresh parameters. The extrapolated future clock bias is used to augment RAIM performance. Relevant flow charts and a new algorithm for forecasting error are introduced. The data analysis proves that this method not only increases availability of RAIM, but improves the rates of fault detection and identification. The minimum fault that can be detected decreases from 50 meters to 40 meters; and the minimum fault that can be detected and identified completely dropped from 70 meters to 60 meters.",Tien Tzu Hsueh Pao/Acta Electronica Sinica,,"Radio Navigation Lab., School of Electronic and Information Engineering, Beijing University of Aeronautics and Astronautics, Beijing 100083, China","Wang, Y.-C., Radio Navigation Lab., School of Electronic and Information Engineering, Beijing University of Aeronautics and Astronautics, Beijing 100083, China; Huang, Z.-G., Radio Navigation Lab., School of Electronic and Information Engineering, Beijing University of Aeronautics and Astronautics, Beijing 100083, China",Clock bias model; Coasting window; Integrity; RAIM,Algorithms; Forecasting; Global positioning system; Least squares approximations; Navigation systems; Clock bias model; Coasting window; Data analysis; Fault identification; Flow chart; Forecasting error; Receiver autonomous integrity monitoring (RAIM); Satellite navigation aids,Article,Scopus,,R,Scope irrelevant,Unclassified,,,,,,,N/A,,N/A,,,,,,
2-s2.0-34547673160,"Blanch-Mur C., Rey-Abella F., Folch-Soler A.",Academic misconduct among Health Sciences students [Nivel de conducta académica deshonesta entre los estudiantes de una escuela de ciencias de la salud],2006,"Objectives. To determine the proportion of health sciences students who engage in academic misconduct and to identify their opinion of this behavior. Method. An anonymous, voluntary, self-administered questionnaire was given to all students in the Blanquerna School of Nursing, Physiotherapy and Nutrition, in February 2004. The questionnaire consisted of three sections: the first aimed to evaluate academic behavior during exams and practical sessions and when handing in coursework, the second was designed to determine students' opinion of copying, and the third aimed to determine their knowledge of academic misconduct among fellow students. Results. A total of 468 questionnaires were analyzed (participation rate 42.5%). Twenty-eight percent (120/468) (95% CI: 19.11-26.7) of the students reported they had copied during an exam. Twenty percent (95% CI: 16.6-23.9) admitted to copying entire texts from other authors without referencing the sources. Approximately 49.7% (95% CI: 45.1-54.2) gave their own work to other classmates to be used as a model. Sixty-eight percent (95% CI: 64.1-72.5) believed that all students cheated at some time during their university course. Students believed that the only punishment that should be applied was to invalidate the corresponding exam, exercise or test while about 20% considered no punishment was necessary. Discussion. Our students are similar those in other countries in terms of copying exams, plagiarizing texts or passing off material from the internet as their own. However, the students in this study tended to see academic misconduct as not especially serious.",Enfermeria Clinica,10.1016/S1130-8621(06)71182-2,"Escola Universitària d'Infermeria, Fisioteràpia I Nutrició Blanquerna, Universitat Ramon Llull, Barcelona, Spain; Escola Universitària d'Infermeria, Fisioteràpia I Nutrició Blanquerna, Universitat Ramon Llull, Padilla, 326-332, 08025 Barcelona, Spain","Blanch-Mur, C., Escola Universitària d'Infermeria, Fisioteràpia I Nutrició Blanquerna, Universitat Ramon Llull, Barcelona, Spain, Escola Universitària d'Infermeria, Fisioteràpia I Nutrició Blanquerna, Universitat Ramon Llull, Padilla, 326-332, 08025 Barcelona, Spain; Rey-Abella, F., Escola Universitària d'Infermeria, Fisioteràpia I Nutrició Blanquerna, Universitat Ramon Llull, Barcelona, Spain; Folch-Soler, A., Escola Universitària d'Infermeria, Fisioteràpia I Nutrició Blanquerna, Universitat Ramon Llull, Barcelona, Spain",Health sciences schools; Honesty; Institutional ethics,,Article,Scopus,,R,Cheating (exclusively),Unclassified,,,,,,,N/A,,N/A,,,,,,
2-s2.0-34547701774,Grieger M.C.A.,Ghostwriters and commerce of scientific papers on the internet: Science at risk [Escritores-fantasma e comércio de trabalhos científicos na internet: A ciência em risco],2007,"Frauds in scientific production are not a rare phenomenon, even in the medical field. Among these frauds are some types of authorship misconduct, such as plagiarism and ghostwriting sponsored by pharmaceutical industries. Another type of misconduct, which is particularly detrimental to science, is the ecommerce of scientific works, which has been growing and frequently shown in the press. OBJECTIVES.To analyze the e-commerce of scientific papers and the means by which these services are offered. METHODS. Eighteen Brazilian web sites that offer elaboration of scientific papers were selected. A request for the elaboration of a final essay for a forged post-graduatie course was sent to each of them. The research requested had already been completed, consequently technical, ethical and bibliographical characteristics were already known to the author. RESULTS. Ten enterprises accepted the order and, except for one, they have not objected to the conditions imposed: Field research, approval by an ethics committee on research and use of the Vancouver norms. Six have not replied and two have not accepted the order alleging that they had no co-workers available for the task. CONCLUSIONS. E-commerce of scientific papers is a fact which can negatively interfere in the ethical, scientific and professional development of graduate and post-graduate students, as well as in scientific production by adulterating data and information found in literature. A new approach is recommended, especially when evaluating final essays.",Revista da Associacao Medica Brasileira,,"Faculdade de Medicina de Itajubá - MG, Brazil; Av. Renó Junior, 362, Cep: 37502-138 - Itajubá - MG, Brazil","Grieger, M.C.A., Faculdade de Medicina de Itajubá - MG, Brazil, Av. Renó Junior, 362, Cep: 37502-138 - Itajubá - MG, Brazil",E-commerce; Essay; Ghostwriting; Internet; Ordering; Publication ethics; Scientific work,"article; commercial phenomena; ethics; human; Internet; professional competence; publishing; research ethics; scientific misconduct; standard; writing; Authorship; Commerce; Ethics, Research; Humans; Internet; Plagiarism; Professional Competence; Publishing; Scientific Misconduct",Article,Scopus,Portuguese,R,Accessibility and language,Unclassified,,,,,,,N/A,,N/A,,,,,,
2-s2.0-34547745870,"Funakoshi Y., Hariu M., Tapper J.E., Marchuk L.L., Shrive N.G., Kanaya F., Rattner J.B., Hart D.A., Frank C.B.",Periarticular ligament changes following ACL/MCL transection in an ovine stifle joint model of osteoarthritis,2007,"Anterior cruciate ligament (ACL) injuries often lead to significant functional impairment, and are associated with increased risk for induction of degenerative joint disease. However, few studies have described the effect of ligament transection on the remaining intact knee ligaments. This study sought to determine specifically what impact combined ACL/medial collateral ligament (MCL) transection had on the remaining intact knee ligaments, particularly from the histological, biochemical, and molecular perspectives. Twenty weeks post-ACL/MCL transection, the cut ends of sheep MCLs were bridged by scar, while the posterior cruciate ligaments (PCLs) and lateral collateral ligaments (LCLs) seemed gross morphologically normal. Water content and cell density increased significantly in the MCL scars and the intact PCLs but were unchanged in the LCLs. Collagen fibril diameter distribution was significantly altered in both MCL scar tissue and uninjured PCLs from transected joints. MMP-13 mRNA levels in MCL scars and PCLs from ligament transected joints were increased, while TIMP-1 mRNA levels were significantly decreased in the PCLs only. This study has shown that some intact ligaments in injured joints are impacted by the injury. The joint appears to behave like an integrated organ system, with injury to one component affecting the other components as the ""organ"" attempts to adapt to the loss of integrity. © 2007 Orthopaedic Research Society. Published by Wiley Periodicals, Inc.",Journal of Orthopaedic Research,10.1002/jor.20370,"McCaig Centre for Joint Injury and Arthritis Research, University of Calgary, 3330 Hospital Dr. NW, Calgary, AB T2N 4N1, Canada; Department of Orthopaedic Surgery, University of Ryukyus, Okinawa, Japan","Funakoshi, Y., McCaig Centre for Joint Injury and Arthritis Research, University of Calgary, 3330 Hospital Dr. NW, Calgary, AB T2N 4N1, Canada, Department of Orthopaedic Surgery, University of Ryukyus, Okinawa, Japan; Hariu, M., McCaig Centre for Joint Injury and Arthritis Research, University of Calgary, 3330 Hospital Dr. NW, Calgary, AB T2N 4N1, Canada; Tapper, J.E., McCaig Centre for Joint Injury and Arthritis Research, University of Calgary, 3330 Hospital Dr. NW, Calgary, AB T2N 4N1, Canada; Marchuk, L.L., McCaig Centre for Joint Injury and Arthritis Research, University of Calgary, 3330 Hospital Dr. NW, Calgary, AB T2N 4N1, Canada; Shrive, N.G., McCaig Centre for Joint Injury and Arthritis Research, University of Calgary, 3330 Hospital Dr. NW, Calgary, AB T2N 4N1, Canada; Kanaya, F., Department of Orthopaedic Surgery, University of Ryukyus, Okinawa, Japan; Rattner, J.B., McCaig Centre for Joint Injury and Arthritis Research, University of Calgary, 3330 Hospital Dr. NW, Calgary, AB T2N 4N1, Canada; Hart, D.A., McCaig Centre for Joint Injury and Arthritis Research, University of Calgary, 3330 Hospital Dr. NW, Calgary, AB T2N 4N1, Canada; Frank, C.B., McCaig Centre for Joint Injury and Arthritis Research, University of Calgary, 3330 Hospital Dr. NW, Calgary, AB T2N 4N1, Canada",ACL injury; Collagen fibril diameter; Ligament remodeling; Matrix metallo-proteinase; Osteoarthritis (OA),"collagen fibril; collagenase 3; messenger RNA; tissue inhibitor of metalloproteinase 1; animal experiment; animal model; animal tissue; anterior cruciate ligament injury; article; cell density; controlled study; female; gene expression; histopathology; knee ligament injury; nonhuman; osteoarthritis; pathogenesis; priority journal; scar formation; sheep; tissue distribution; tissue structure; water content; Animals; Anterior Cruciate Ligament; Collagen; Disease Models, Animal; Female; Knee Injuries; Ligaments, Articular; Matrix Metalloproteinase 13; Medial Collateral Ligament, Knee; Microscopy, Electron, Transmission; Osteoarthritis; RNA, Messenger; Sheep; Tissue Inhibitor of Metalloproteinase-1",Article,Scopus,,R,Scope irrelevant,Unclassified,,,,,,,N/A,,N/A,,,,,,
2-s2.0-34547887341,"Sligo F., Culligan N.",Defining focus and integrity in building a community research coalition,2007,"Pervasive and systemic barriers to collaborative university-community research make such studies highly challenging. Yet the necessity of participative research means that feasible ways to conduct high quality collaborative investigations must be sought. In a longitudinal action research study investigating adult literacy, issues facing community and academic researchers centred upon focus and integrity. Differing researchers defined focus and integrity in sharply varying ways, so that terminology employed within the programme formed contested sites of meaning and interpretation. This meant that ideas of research integrity held very different connotations for different actors. Yet the viability of the programme depended on both academics and community people attempting to expand their horizons by understanding and taking into account others' perceptions. © 2007 Springer Science+Business Media, LLC.",Systemic Practice and Action Research,10.1007/s11213-006-9064-y,"of Department of Communication and Journalism, Massey University, P.O. Box 756, Wellington, New Zealand","Sligo, F., of Department of Communication and Journalism, Massey University, P.O. Box 756, Wellington, New Zealand; Culligan, N., of Department of Communication and Journalism, Massey University, P.O. Box 756, Wellington, New Zealand",Collaborative research; Community research; Diversity in community; Integrity in research; University-community research,,Article,Scopus,,R,Methods,Unclassified,,,,,,,N/A,,N/A,,,,,,
2-s2.0-34547908897,Mawson J.,"Research councils, universities and local government: Building bridges",2007,"This article examines the relationship between the UK's research councils, which are responsible for funding research in British universities and the development, execution and dissemination of that research in partnership with local government. The article focuses on the role of a partnership: the Local Authority Research Council Initiative (LARCI). The recent establishment of a national focus for the planning of local government research has opened up the exciting possibility of engaging with the research councils at a strategic level. © 2007 CIPFA.",Public Money and Management,10.1111/j.1467-9302.2007.00593.x,"Local Government Centre, Warwick Business School; Local Authority Research Council Initiative","Mawson, J., Local Government Centre, Warwick Business School, Local Authority Research Council Initiative",,,Article,Scopus,,R,"Research ethics, bioethics, clinical ethics, or ethical role of universities in society",Unclassified,,,,,,,N/A,,N/A,,,,,,
2-s2.0-34547915619,Coleman H.,New development: Connecting public service researchers and practitioners,2007,"Universities and research centres are responsible for some of the most sophisticated, forward-thinking analysis of the challenges facing public services today. But how do we effectively transfer that knowledge from the academic community to the hands of those at the front line of public policy? The Economic and Social Research Council has invested in a dedicated service to do just that: a research brokerage for public services, creating a bridge between researchers and research users. © 2007 CIPFA.",Public Money and Management,10.1111/j.1467-9302.2007.00595.x,ESRC,"Coleman, H., ESRC",,,Article,Scopus,,R,"Research ethics, bioethics, clinical ethics, or ethical role of universities in society",Unclassified,,,,,,,N/A,,N/A,,,,,,
2-s2.0-34547940339,"Shuqiao Y., Huiqin Y., Xiongzhao Z., Auerbach R.P., Abela J.R.Z., Pulleyblank R.W., Xi T.","An examination of the psychometric properties of the Chinese version of the barratt impulsiveness scale, 11th version in a sample of Chinese adolescents",2007,"The current study examined the psychometric properties of the Chinese translation of the Barratt Impulsiveness Scale 11th version in a sample of adolescents from Hunan province, mainland China. During an initial assessment, 396 secondary school students (Grades 10-12) completed the scale and self-report measures assessing problem behaviors and alcohol use. The scale was re-administered 1 mo. later, Analysis gave Cronbach alpha of .80 and test-retest reliability of .70. Confirmatory factor analysis indicated a model containing six first-order factors and two second-order factors best fit the data. Girls reported higher Total scores than boys as well as higher scores on the motor impulsiveness, self-control, and cognitive instability sub-scales. Scores were associated in the predicted direction with a wide variety of self-reported problem behaviors including alcohol use, gambling, and academic misconduct. Current findings indicate that the translated scale is a promising tool with some further development for assessing impulsiveness with Chinese adolescents. © Perceptual and Motor Skills 2007.",Perceptual and Motor Skills,10.2466/PMS.104.4.1169-1182,"Medical Psychological Research Center, Central South University; McGill University; Medical Psychological Research Center, 2nd Xiangya Hospital, Central South University, Changsha, Hunan 410011, China; Department of Psychology, McGill University, Stewart Biological Sciences Building, 1205 Dr. Penfield Avenue, Montreal, Que. H3A 1B1, Canada","Shuqiao, Y., Medical Psychological Research Center, Central South University, Medical Psychological Research Center, 2nd Xiangya Hospital, Central South University, Changsha, Hunan 410011, China, Department of Psychology, McGill University, Stewart Biological Sciences Building, 1205 Dr. Penfield Avenue, Montreal, Que. H3A 1B1, Canada; Huiqin, Y., Medical Psychological Research Center, Central South University; Xiongzhao, Z., Medical Psychological Research Center, Central South University; Auerbach, R.P., McGill University; Abela, J.R.Z., McGill University; Pulleyblank, R.W., McGill University; Xi, T., McGill University",,"adolescent; article; Asian; child behavior; child psychology; comparative study; drinking behavior; factorial analysis; female; high risk behavior; human; impulsiveness; language; male; pathological gambling; personality test; psychological aspect; psychometry; questionnaire; reproducibility; sex difference; statistics; Adolescent; Adolescent Behavior; Adolescent Psychology; Alcohol Drinking; Asian Continental Ancestry Group; Factor Analysis, Statistical; Female; Gambling; Humans; Impulsive Behavior; Male; Personality Inventory; Psychometrics; Questionnaires; Reproducibility of Results; Risk-Taking; Sex Factors; Translating",Article,Scopus,,R,Scope irrelevant,Unclassified,,,,,,,N/A,,N/A,,,,,,
2-s2.0-34548019957,"Osakabe K., Onizawa K., Shibata K., Suzuki M.",Probabilistic evaluation of current structural integrity assessment method for reactor pressure vessel using PASCAL ver. 2,2007,"Fifty-five nuclear power plants of light water reactors (LWRs) in Japan including seven plants which have already reached a 30-year operation have been operated as of September 2006. The probabilistic fracture mechanics (PFM) method has been recently highlighted to rationally incorporate the uncertainties arising from the material properties, defect distribution, inspection quality and so on, unlike the conventional deterministic method. As a part of the materials aging degradation and structural integrity research for LWR components, the PFM analysis code PASCAL has been developed in JAEA. This code evaluates the conditional probabilities of crack initiation and fracture of a reactor pressure vessel (RPV) under transient conditions such as pressurized thermal shock (PTS). Sensitivity analyses for pre-service and in-service inspections have been performed according to JSME S NA1-2004 and the correlation between the results by deterministic analysis according to the JEAC 4206-2004 and probabilistic analysis based on PFM for the integrity of RPV under PTS has also been described. © Atomic Energy Society of Japan.",Transactions of the Atomic Energy Society of Japan,,"Nuclear Safety Research Center, Japan Atomic Energy Agency, 2-4 Shirakata-Shirane, Naka-gun, Ibaraki 319-1195, Japan; Mizuho Information and Research Institute, Inc.","Osakabe, K., Nuclear Safety Research Center, Japan Atomic Energy Agency, 2-4 Shirakata-Shirane, Naka-gun, Ibaraki 319-1195, Japan, Mizuho Information and Research Institute, Inc.; Onizawa, K., Nuclear Safety Research Center, Japan Atomic Energy Agency, 2-4 Shirakata-Shirane, Naka-gun, Ibaraki 319-1195, Japan; Shibata, K., Nuclear Safety Research Center, Japan Atomic Energy Agency, 2-4 Shirakata-Shirane, Naka-gun, Ibaraki 319-1195, Japan; Suzuki, M., Nuclear Safety Research Center, Japan Atomic Energy Agency, 2-4 Shirakata-Shirane, Naka-gun, Ibaraki 319-1195, Japan",Fracture toughness; Irradiation embrittlement; Non-destructive examination; Pressurized thermal shock; Probabilistic fracture mechanics; Reactor pressure vessel,Degradation; Fracture mechanics; Light water reactors; Pascal (programming language); Pressure vessels; Sensitivity analysis; Structural integrity; Thermal shock; Conventional deterministic method; Irradiation embrittlement; Non-destructive examination; Probabilistic fracture mechanics (PFM); Nuclear power plants,Article,Scopus,,R,Scope irrelevant,Unclassified,,,,,,,N/A,,N/A,,,,,,
2-s2.0-34548034905,"Osakabe K., Onizawa K., Shibata K., Suzuki M.",Development of probabilistic fracture mechanics analysis code PASCAL ver. 2 for reactor pressure vessel,2007,"As a part of the materials aging degradation and structural integrity research for LWR components, the probabilistic fracture mechanics (PFM) analysis code PASCAL has been developed in JAEA. This code evaluates the conditional probabilities of crack initiation and fracture of a reactor pressure vessel (RPV) under transient conditions such as pressurized thermal shock (PTS). A standardized analysis method is proposed on the basis of the development of PASCAL ver. 2 and results of sensitivity analyses. Graphical user interface (GUI) including the standardized analysis method as default settings and values has been also developed for PASCAL ver. 2. A case study showed that non-destructive examination with good performance had a more significant effect on the probability of failure than non-destructive examinations repeated with low performance. © Atomic Energy Society of Japan.",Transactions of the Atomic Energy Society of Japan,,"Nuclear Safety Research Center, Japan Atomic Energy Agency, 2-4 Shirakata-Shirane, Naka-gun, Ibaraki 319-1195, Japan; Mizuho Information and Research Institute, Inc.","Osakabe, K., Nuclear Safety Research Center, Japan Atomic Energy Agency, 2-4 Shirakata-Shirane, Naka-gun, Ibaraki 319-1195, Japan, Mizuho Information and Research Institute, Inc.; Onizawa, K., Nuclear Safety Research Center, Japan Atomic Energy Agency, 2-4 Shirakata-Shirane, Naka-gun, Ibaraki 319-1195, Japan; Shibata, K., Nuclear Safety Research Center, Japan Atomic Energy Agency, 2-4 Shirakata-Shirane, Naka-gun, Ibaraki 319-1195, Japan; Suzuki, M., Nuclear Safety Research Center, Japan Atomic Energy Agency, 2-4 Shirakata-Shirane, Naka-gun, Ibaraki 319-1195, Japan",Fracture toughness; Irradiation embrittlement; Non-destructive examination; Pressurized thermal shock; Probabilistic fracture mechanics; Reactor pressure vessel,Degradation; Fracture mechanics; Graphical user interfaces; Pascal (programming language); Pressure vessels; Structural integrity; Thermal shock; Irradiation embrittlement; LWR components; Non-destructive examination; Nuclear reactors,Article,Scopus,,R,Scope irrelevant,Unclassified,,,,,,,N/A,,N/A,,,,,,
2-s2.0-34548723512,Conklin T.A.,Method or madness: Phenomenology as knowledge creator,2007,"This article reviews the research method of phenomenology and its use in understanding human experience. This is conceptualized in the context of a research study performed with nine participants and their experience of finding their ""calling."" Their experiences are used as the medium through which Husserl's method is explored. Questions and concerns about this alternative and nontraditional approach to creating and understanding new social knowledge are considered. Reflexivity and the researcher's psychological integrity in application of the method are explored. © 2007 Sage Publications.",Journal of Management Inquiry,10.1177/1056492607306023,John Carroll University,"Conklin, T.A., John Carroll University",Calling; Husserl; Phenomenology; Reflexivity,,Article,Scopus,,R,Scope irrelevant,Unclassified,,,,,,,N/A,,N/A,,,,,,
2-s2.0-34548726111,Thomsen M.,A course treating ethical issues in physics,2007,"A course focusing on ethical issues in physics has been taught to undergraduate students at Eastern Michigan University since 1988. The course covers both responsible conduct of research and ethical issues associated with how physicists interact with the rest of society. Since most undergraduate physics majors will not have a career in academia, it is important that a course such as this address issues that will be relevant to physicists in a wide range of job situations. There is a wealth of published work that can be drawn on for reading assignments. © 2007 Springer Science + Business Media B.V.",Science and Engineering Ethics,10.1007/s11948-006-0004-0,"Department of Physics and Astronomy, Eastern Michigan University, Ypsilanti, MI 48197, United States","Thomsen, M., Department of Physics and Astronomy, Eastern Michigan University, Ypsilanti, MI 48197, United States",Ethics education; Physics,"article; education; ethics; human; physics; public relations; publishing; research ethics; social behavior; United States; Ethics, Research; Humans; Interprofessional Relations; Michigan; Physics; Publishing; Social Responsibility",Article,Scopus,,R,Scope irrelevant,Unclassified,,,,,,,N/A,,N/A,,,,,,
2-s2.0-34548845863,Dyer O.,"GMC clears GP accused of giving court ""junk science"" on MMR vaccine.",2007,[No abstract available],BMJ (Clinical research ed.),,,"Dyer, O.",,measles mumps rubella vaccine; article; expert witness; general practice; legal aspect; scientific misconduct; United Kingdom; Expert Testimony; Family Practice; Great Britain; Measles-Mumps-Rubella Vaccine; Scientific Misconduct,Article,Scopus,English,R,Article format or year,Unclassified,,,,,,,N/A,,N/A,,,,,,
2-s2.0-34648839996,"Zhang Y.-L., Yang J.-C., Tang D.-G.",Decision standard for grade of pile integrity by cross-hole sonic logging,2007,"The concrete quality of pile was tested by cross-hole sonic logging, and the grade of the pile integrity quantitatively estimated. After analyses, the coefficient of integrity β suitable to cross-hole sonic logging was used in order to determine the interval of the coefficient of integrity by the probability method which can determine the classification of the pile integrity. Research indicates that the method is easy to calculate, convenient to use, exact to detect the anomaly of concrete and able to recognize the different grave degree of anomaly, and that the grade of the pile integrity can be rationally decided.",Jiefangjun Ligong Daxue Xuebao/Journal of PLA University of Science and Technology (Natural Science Edition),,"Engineering Institute of Corps of Engineers, PLA Univ. of Sci. and Technol., Nanjing 210007, China; The Third Engineer Scientific Research Institute, Headquarters of the General Staff, Luoyang 471023, China; Jiangsu Provincial Jianyuan Geotechnical and Surveying Institute Co. Ltd., Nanjing 210029, China","Zhang, Y.-L., Engineering Institute of Corps of Engineers, PLA Univ. of Sci. and Technol., Nanjing 210007, China, Jiangsu Provincial Jianyuan Geotechnical and Surveying Institute Co. Ltd., Nanjing 210029, China; Yang, J.-C., The Third Engineer Scientific Research Institute, Headquarters of the General Staff, Luoyang 471023, China; Tang, D.-G., Engineering Institute of Corps of Engineers, PLA Univ. of Sci. and Technol., Nanjing 210007, China",Classification of pile integrity; Cross-hole sonic logging; Fixed quantity; Foundation pile; Judgment standard,Classification (of information); Defects; Pile foundations; Ultrasonic testing; Classification of pile integrity; Cross hole sonic logging; Fixed quantity; Foundation pile; Judgment standard; Concrete testing,Article,Scopus,,R,Scope irrelevant,Unclassified,,,,,,,N/A,,N/A,,,,,,
2-s2.0-34748876534,"Kossman S., Casper G.R., Severtson D.J., Grenier A.S., Or C., Carayon P., Brennan P.F.",Designing study nurses' training to enhance research integrity: a macroergonomic approach.,2006,"Successful field evaluation of informatics initiatives designed to create technology-enhanced professional practice relies on adequate training of experimental participants. However, such training presents design, implementation and evaluation challenges. A macroergonomic approach, focusing on an organizational view of people, technology, task and environment interactions in work systems, provides a framework for training that allows anticipation and compensation for challenges. In the HeartCare II project, we developed a multi-level training program for nurses and patients enrolled in a field trial of an innovative technology-enhanced professional practice model. Using a macroergonomic approach, we designed three waves of training centered on a train-the-trainer model. Evaluation tools for each training wave provided improvement feedback. Despite planning, a drop-off occurred between training waves, affecting both recruitment and patient training. Troubleshooting identified people, task, technology, and organizational concerns. Strategies to increase nurse buy-in and improve technical performance are making a difference. Organizational challenges remain the most intractable.",AMIA ... Annual Symposium proceedings / AMIA Symposium. AMIA Symposium,,"School of Nursing, University of Wisconsin-Madison, Madison, Wisconsin, USA.","Kossman, S., School of Nursing, University of Wisconsin-Madison, Madison, Wisconsin, USA.; Casper, G.R., School of Nursing, University of Wisconsin-Madison, Madison, Wisconsin, USA.; Severtson, D.J., School of Nursing, University of Wisconsin-Madison, Madison, Wisconsin, USA.; Grenier, A.S., School of Nursing, University of Wisconsin-Madison, Madison, Wisconsin, USA.; Or, C., School of Nursing, University of Wisconsin-Madison, Madison, Wisconsin, USA.; Carayon, P., School of Nursing, University of Wisconsin-Madison, Madison, Wisconsin, USA.; Brennan, P.F., School of Nursing, University of Wisconsin-Madison, Madison, Wisconsin, USA.",,"adult; article; education; female; health care quality; human; male; medical informatics; methodology; middle aged; nursing education; nursing evaluation research; Adult; Education, Nursing; Female; Humans; Male; Medical Informatics; Middle Aged; Nursing Evaluation Research; Program Evaluation",Article,Scopus,,R,"Research ethics, bioethics, clinical ethics, or ethical role of universities in society",Unclassified,,,,,,,N/A,,N/A,,,,,,
2-s2.0-34748889612,"Kearns J., O'Connor B.C., Moore F.B.-G.",Provocations on the structure of scholarly writing in the digital era,2007,"Purpose - This paper seeks to urge academic writers to restructure their scholarly writing to reflect the depth of their intellectual message rather than conforming to the structurally simplistic hegemony of the mundane. Design/methodology/approach - The authors of this paper represent interdisciplinary perspectives in research. Each has grown increasingly disillusioned by dwindling consideration given to the structural integrity of scholarly thoughts in academic writing. This paper does not suggest a solution of strict adherence to some style manual or single format, nor does it suggest a privilege to any particular constraint. Indeed, the authors suggest that the digital environment enables unimagined communication possibilities, and hence a counterpoise to any single rigid structure. New formats require attention to the engineering of message structure. Using historical examples and modern applications from their disciplines, the authors offer provocations on the structures of scholarly writing. They pay particular attention to modern applications of Claude Shannon's information theory and to the introduction of models for understanding the audiences of academic writing. Findings - Scholarly writing warrants a deep investment of intellectual, personal, and communicative effort. Readers will have different requirements for any individual piece of scholarly writing, but all will be served by the fullest expression of the logic, care, tenacity, and passion that drove the research to fruition. Engineering the scholarly document to contribute to audiences of differing interests and abilities requires careful consideration rather than mere assumption of a generic reader. Originality/value - Research for this paper yielded few preceding studies that considered document structures for scholarship. Authors of this paper intend to provoke academes to engage in active and intentional reconsiderations of how they choose to say what they have to say, by following the presented examples of writing and tools for measuring structural elements of documents.",On the Horizon,10.1108/10748120710836246,"College of Education, University of Akron, Akron, OH, United States; School of Library and Information Sciences, University of North Texas, Denton, TX, United States; Department of Biology, University of Akron, Akron, OH, United States","Kearns, J., College of Education, University of Akron, Akron, OH, United States; O'Connor, B.C., School of Library and Information Sciences, University of North Texas, Denton, TX, United States; Moore, F.B.-G., Department of Biology, University of Akron, Akron, OH, United States",Academic staff; Change management; Research work; Serials,,Article,Scopus,,R,Methods,Unclassified,,,,,,,N/A,,N/A,,,,,,
2-s2.0-34848840611,Zigmond J.,Surgeon general's warning. Nomination 'scuffle in larger war' on science policy.,2007,[No abstract available],Modern healthcare,,,"Zigmond, J.",,article; government; politics; public health service; science; scientific misconduct; United States; Federal Government; Politics; Science; Scientific Misconduct; United States; United States Public Health Service,Article,Scopus,English,R,"Research ethics, bioethics, clinical ethics, or ethical role of universities in society",Unclassified,,,,,,,N/A,,N/A,,,,,,
2-s2.0-34848852705,[No author name available],"Evidence of political interference / EPA air pollution decision threatens public health: science disregarded, misrepresented on particulate matter standard.",2007,"Political interference with federal agency science threatens our health, safety, and environment. The Environmental Protection Agency's recent air pollution rules on fine particulate matter (PM) are particularly egregious assaults on public health and the integrity of science in federal policy making. The Union of Concerned Scientists (UCS) has been actively monitoring and documenting cases of such interference and mobilizing scientists and citizens alike to push for reforms. Information on the PM case, and many others, are available on the UCS website (http://www.ucsusa.org).",New solutions : a journal of environmental and occupational health policy : NS,,,,,air pollution; article; economics; ethics; government; government regulation; human; legal aspect; maximum allowable concentration; particulate matter; policy; politics; science; scientific misconduct; standard; United States; Air Pollution; Government Regulation; Humans; Maximum Allowable Concentration; Particulate Matter; Politics; Public Policy; Science; Scientific Misconduct; United States; United States Environmental Protection Agency,Article,Scopus,English,R,"Research ethics, bioethics, clinical ethics, or ethical role of universities in society",Unclassified,,,,,,,N/A,,N/A,,,,,,
2-s2.0-34848869391,Rest K.,Silenced science: air pollution decision-making at the EPA threatens public health.,2007,"The saga of the Environmental Protection Agency's new particulate matter (PM) rule is yet another example of this Administration's disregard for and disrespect of science and scientists--and may signal the beginning of a disturbing trend to reduce the role of science in protecting the quality of our air. Political interference in the PM case is clear. And more trouble may be in the wings when it comes to acceptable levels of ozone pollution and the process for setting the National Ambient Air Quality Standards (NAAQS). For several years, the Union of Concerned Scientists has been actively monitoring and documenting the misuse of science in public policy-making. Consider this a call to arms. Now is the time to engage your elected officials on these issues.",New solutions : a journal of environmental and occupational health policy : NS,,"Union of Concerned Scientists, 2 Brattle Square Cambridge, MA 02238-9105, USA.","Rest, K., Union of Concerned Scientists, 2 Brattle Square Cambridge, MA 02238-9105, USA.",,ozone; air pollution; article; ethics; government; government regulation; human; legal aspect; maximum allowable concentration; particulate matter; policy; politics; science; scientific misconduct; standard; United States; Air Pollution; Government Regulation; Humans; Maximum Allowable Concentration; Ozone; Particulate Matter; Politics; Public Policy; Science; Scientific Misconduct; United States; United States Environmental Protection Agency,Article,Scopus,English,R,"Research ethics, bioethics, clinical ethics, or ethical role of universities in society",Unclassified,,,,,,,N/A,,N/A,,,,,,
2-s2.0-34848892109,"Arkoosh M.K., Derby K.M., Wacker D.P., Berg W., McLaughlin T.F., Barretto A.",A descriptive evaluation of long-term treatment integrity,2007,"The validity of selecting treatment contingencies on the basis of the results obtained through functional analysis is well documented. However, a number of second-generation questions have emerged: For example, what are the parameters required to achieve desired treatment outcomes? More specifically, what is the degree of treatment integrity needed for the successful reduction of problem behavior? This study had two purposes: to describe the relationship between treatment integrity levels and treatment effectiveness and to highlight the importance of reporting the treatment integrity in outcome-based research. The results indicate that a high level of treatment integrity is required for treatment success. Furthermore, the authors found that very low levels of integrity may be required for behavioral reduction procedures (i.e., extinction) if high levels of reinforcement are provided. © 2007 Sage Publications.",Behavior Modification,10.1177/0145445507302254,"Gonzaga University, Spokane, WA; University of Iowa, Iowa City; Department of Special Education, Gonzaga University, Spokane, WA 99258-0025","Arkoosh, M.K., Gonzaga University, Spokane, WA; Derby, K.M., Gonzaga University, Spokane, WA, Department of Special Education, Gonzaga University, Spokane, WA 99258-0025; Wacker, D.P., University of Iowa, Iowa City; Berg, W., University of Iowa, Iowa City; McLaughlin, T.F., Gonzaga University, Spokane, WA; Barretto, A., Gonzaga University, Spokane, WA",Integrity; Long-term treatment; Parent training,article; attention; behavior disorder; behavior therapy; child; education; evaluation; human; interpersonal communication; methodology; parent; psychological aspect; reinforcement; social behavior; teaching; time; treatment outcome; videorecording; Attention; Behavior Therapy; Child; Child Behavior Disorders; Communication; Humans; Parents; Reinforcement (Psychology); Social Behavior; Teaching; Time Factors; Treatment Outcome; Videotape Recording,Article,Scopus,,R,Scope irrelevant,Unclassified,,,,,,,N/A,,N/A,,,,,,
2-s2.0-34848899774,"Kisamore J.L., Stone T.H., Jawahar I.M.",Academic integrity: The relationship between individual and situational factors on misconduct contemplations,2007,"Recent, well-publicized scandals, involving unethical conduct have rekindled interest in academic misconduct. Prior studies of academic misconduct have focussed exclusively on situational factors (e.g., integrity culture, honor codes), demographic variables or personality constructs. We contend that it is important to also examine how these classes of variables interact to influence perceptions of and intentions relating to academic misconduct. In a sample of 217 business students, we examined how integrity culture interacts with Prudence and Adjustment to explain variance in estimated frequency of cheating, suspicions of cheating, considering cheating and reporting cheating. Age, integrity culture, and personality variables were significantly related to different criteria. Overall, personality variables explained the most unique variance in academic misconduct, and Adjustment interacted with integrity culture, such that integrity culture had more influence on intentions to cheat for less well-adjusted individuals. Implications for practice are discussed and future research directions are offered. © 2007 Springer Science+Business Media B.V.",Journal of Business Ethics,10.1007/s10551-006-9260-9,"University of Oklahoma in Tulsa, Department of Psychology, OU Schustarman Center, Tulsa, OK 74135-2553, United States; Oklahoma State University, Department of Management, Spears School of Business, Stillwater, OK 74078, United States; Illinois State University, Department of Management and Quantitative Methods, College of Business, Normal, IL 61790-5580, United States","Kisamore, J.L., University of Oklahoma in Tulsa, Department of Psychology, OU Schustarman Center, Tulsa, OK 74135-2553, United States; Stone, T.H., Oklahoma State University, Department of Management, Spears School of Business, Stillwater, OK 74078, United States; Jawahar, I.M., Illinois State University, Department of Management and Quantitative Methods, College of Business, Normal, IL 61790-5580, United States",Academic culture; Academic integrity; Cheating; Misconduct; Personality,,Article,Scopus,,R,Cheating (exclusively),Unclassified,,,,,,,N/A,,N/A,,,,,,
2-s2.0-34948885560,Bohnsack R.,Image interpretation and the documental method [A interpretação de imagens e o método documentário],2007,"The considerable development of qualitative methods over the last 20 years is intrinsically related to the ""linguistic turn"". The assumption that recorded texts are the basic data for all scientific research is therefore responsible for that prevalence of text interpretation methods and for such particular ""fixation"" on texts within qualitative methodologies. However, a difference has to be established between communication about (über) image and communication through (durch) image. Methodological access to the pre-conceptual or 'atheoretical' understanding was introduced in the 1920s by the iconology of Erwin Panofsky and his contemporary Karl Mannheim with his documental interpretation method. Important correspondences can be demonstrated between the two approaches as well as regarding the field of semiotics. Based on the understanding that the iconic character in its obstinateness is not properly available to us through language, we may conclude - referenced in the aforementioned authors as well as in Barthes, Foucault, and Imdahl -, that apprehending an image's peculiarities implies suspending, ""placing in parentheses"" our connotations (based on the iconographic previous knowledge mediated by language) as much as possible. Methodologically, the iconic character can only be reconstructed through the description of form, especially image's planimetric structure. The documental method of image interpretation is fit to face such challenge. © 2007 Programa de Pós-Graduação em Sociologia - UFRGS.",Sociologias,,"Departamento de Sociologia, Universidade de Bielefeld, Bielefeld, Germany; Universidade Erlangen-Nürnberg, Erlangen, Germany; Universidade Livre de Berlim, Berlin, Germany","Bohnsack, R., Departamento de Sociologia, Universidade de Bielefeld, Bielefeld, Germany, Universidade Erlangen-Nürnberg, Erlangen, Germany, Universidade Livre de Berlim, Berlin, Germany",Documental method; Erwin Panofsky; Image interpretation; Kari Mannheim; Qualitative methods,,Article,Scopus,,R,Scope irrelevant,Unclassified,,,,,,,N/A,,N/A,,,,,,
2-s2.0-35048897927,[No author name available],Let's go round again!,2007,"New research by the Waste & Resources Action Programme (WRAP) Recycled Paper Advocacy Team has revealed that print and paper buyers are planning to significantly increase their use of recycled paper. WRAP was established as a not for profit company in 2000 and is backed by government funding from Defra. It focuses on market development and support to drive forward recycling and materials resource efficiency. Over two thirds have targets or plans to increase the proportion of paper products using recycled content in the future, according to the research amongst those responsible for print and paper procurement for major organizations across the UK. 51% plan to increase their use by up to 20% and others plan to be more bullish, with a quarter planning to increase their procurement by between 20% to 50%. The single most important factor when procuring recycled paper is that it has equal performance and reliability or printing presses and office machines as virgin stock.",Paper Making and Distribution,,,,,,Article,Scopus,,R,Scope irrelevant,Unclassified,,,,,,,N/A,,N/A,,,,,,
[truncated: 6,278,631 more chars]
